# Supplementary material for: Genetic Diversity and Population Structure of Cucumber (Cucumis sativus L.)
Source: PLoS One. 2012 Oct 12;7(10):e46919. doi: 10.1371/journal.pone.0046919 (PMC3470563; doi:10.1371/journal.pone.0046919)
Supplement: Table S1 — Detail information of cucumber resources. (XLSX) [file pone.0046919.s001.xlsx]

## Sheet: Sheet1
Individual code	Accession Name	Geographical origin	Model	Genebank origin	PI#	Species
CG0001	LJ 90430	India	P3	NPGS	Ames 28156	Cucumis sativus var. hardwickii
CG0002	11621	India, Meghalaya	P3	NPGS	PI 183967	Cucumis sativus var. hardwickii
CG0003	13598	India, Uttar Pradesh	P2P3	NPGS	PI 215589	Cucumis sativus var. hardwickii
CG0004	VIR 3147	India	P3	NPGS	PI 462369	Cucumis sativus var. hardwickii
CG0005	VIR 3147	India	P3	NPGS	PI 504564	Cucumis sativus var. hardwickii
CG0006	Hamil	India	P2	CGN	CGN20909	Cucumis sativus var. hardwickii
CG0007	bhw2	India	P3	CGN	CGN 24497	Cucumis sativus var. hardwickii
CG0008	bhw3	India	P3	CGN	CGN 24666	Cucumis sativus var. hardwickii
CG0009	bkw4	India	P3	CGN	CGN 24667	Cucumis sativus var. hardwickii
CG0010	hw1	India	P2P3	East-West Seed International Ltd.	NA	Cucumis sativus var. hardwickii
CG0011	hw2	India	P3	East-West Seed International Ltd.	NA	Cucumis sativus var. hardwickii
CG0012	hw3	India	P3	East-West Seed International Ltd.	NA	Cucumis sativus var. hardwickii
CG0013	hw4	India	P3	East-West Seed International Ltd.	NA	Cucumis sativus var. hardwickii
CG0014	hw5	India	P3	East-West Seed International Ltd.	NA	Cucumis sativus var. hardwickii
CG0015	hw6	India	P3	East-West Seed International Ltd.	NA	Cucumis sativus var. hardwickii
CG0016	CUS 233	India	P3	IPK	NA	Cucumis sativus var. hardwickii
CG0017	CUS 155	India	P3	IPK	NA	Cucumis sativus var. hardwickii
CG0020	PI 214155	India, Karnataka	P3	NPGS	PI 214155	Cucumis sativus var. hardwickii
CG0101	Polskite	Poland	P1	CGN	CGN19754	Cucumis sativus var. sativus
CG0102	3611x715	Poland	P1	CGN	CGN19815	Cucumis sativus var. sativus
CG0103	Northern Delight	NA	P1	CGN	CGN22243	Cucumis sativus var. sativus
CG0104	Pickle 263/152	Japan	P1	CGN	CGN22272	Cucumis sativus var. sativus
CG0105	CGN23408	NA	P1	CGN	CGN23408	Cucumis sativus var. sativus
CG0106	GS100	NA	P1	IVF-CAAS	GS100	Cucumis sativus var. sativus
CG0107	GS105	NA	P1	IVF-CAAS	GS105	Cucumis sativus var. sativus
CG0108	GS107	NA	P1	IVF-CAAS	GS107	Cucumis sativus var. sativus
CG0109	GS108	NA	P1	IVF-CAAS	GS108	Cucumis sativus var. sativus
CG0110	GS109	NA	P1	IVF-CAAS	GS109	Cucumis sativus var. sativus
CG0111	GS111	NA	P1	IVF-CAAS	GS111	Cucumis sativus var. sativus
CG0112	GS114	NA	P1	IVF-CAAS	GS114	Cucumis sativus var. sativus
CG0113	GS115	NA	P1	IVF-CAAS	GS115	Cucumis sativus var. sativus
CG0114	GS117	NA	P1	IVF-CAAS	GS117	Cucumis sativus var. sativus
CG0115	GS12	NA	P1	IVF-CAAS	GS12	Cucumis sativus var. sativus
CG0116	GS124	NA	P1	IVF-CAAS	GS124	Cucumis sativus var. sativus
CG0117	GS125	NA	P1	IVF-CAAS	GS125	Cucumis sativus var. sativus
CG0118	GS126	NA	P1	IVF-CAAS	GS126	Cucumis sativus var. sativus
CG0119	GS131	NA	P1	IVF-CAAS	GS131	Cucumis sativus var. sativus
CG0120	GS132	NA	P1	IVF-CAAS	GS132	Cucumis sativus var. sativus
CG0121	GS133	NA	P1	IVF-CAAS	GS133	Cucumis sativus var. sativus
CG0122	GS134	NA	P1	IVF-CAAS	GS134	Cucumis sativus var. sativus
CG0123	GS139	NA	P1	IVF-CAAS	GS139	Cucumis sativus var. sativus
CG0124	GS140	NA	P1	IVF-CAAS	GS140	Cucumis sativus var. sativus
CG0125	GS141	NA	P1	IVF-CAAS	GS141	Cucumis sativus var. sativus
CG0126	GS142	NA	P1	IVF-CAAS	GS142	Cucumis sativus var. sativus
CG0127	GS145	NA	P1	IVF-CAAS	GS145	Cucumis sativus var. sativus
CG0128	GS147	NA	P1	IVF-CAAS	GS147	Cucumis sativus var. sativus
CG0129	GS150	NA	P1	IVF-CAAS	GS150	Cucumis sativus var. sativus
CG0130	GS151	NA	P1	IVF-CAAS	GS151	Cucumis sativus var. sativus
CG0131	GS154	NA	P1	IVF-CAAS	GS154	Cucumis sativus var. sativus
CG0132	GS155	NA	P1	IVF-CAAS	GS155	Cucumis sativus var. sativus
CG0133	GS156	NA	P1	IVF-CAAS	GS156	Cucumis sativus var. sativus
CG0134	GS162	NA	P1	IVF-CAAS	GS162	Cucumis sativus var. sativus
CG0135	GS164	NA	P1	IVF-CAAS	GS164	Cucumis sativus var. sativus
CG0136	GS165	NA	P1	IVF-CAAS	GS165	Cucumis sativus var. sativus
CG0137	GS166	NA	P1	IVF-CAAS	GS166	Cucumis sativus var. sativus
CG0138	GS167	NA	P1	IVF-CAAS	GS167	Cucumis sativus var. sativus
CG0139	GS20	NA	P1	IVF-CAAS	GS20	Cucumis sativus var. sativus
CG0140	GS21	NA	P1	IVF-CAAS	GS21	Cucumis sativus var. sativus
CG0141	GS22	NA	P1	IVF-CAAS	GS22	Cucumis sativus var. sativus
CG0142	GS3	NA	P1	IVF-CAAS	GS3	Cucumis sativus var. sativus
CG0143	GS30	NA	P1	IVF-CAAS	GS30	Cucumis sativus var. sativus
CG0144	GS32	NA	P1	IVF-CAAS	GS32	Cucumis sativus var. sativus
CG0145	GS35	NA	P1	IVF-CAAS	GS35	Cucumis sativus var. sativus
CG0146	GS37	NA	P1	IVF-CAAS	GS37	Cucumis sativus var. sativus
CG0147	GS38	NA	P1	IVF-CAAS	GS38	Cucumis sativus var. sativus
CG0148	GS4	NA	P1	IVF-CAAS	GS4	Cucumis sativus var. sativus
CG0149	GS44	NA	P1	IVF-CAAS	GS44	Cucumis sativus var. sativus
CG0150	GS45	NA	P1	IVF-CAAS	GS45	Cucumis sativus var. sativus
CG0151	GS46	NA	P1	IVF-CAAS	GS46	Cucumis sativus var. sativus
CG0152	GS48	NA	P1	IVF-CAAS	GS48	Cucumis sativus var. sativus
CG0153	GS51	NA	P1	IVF-CAAS	GS51	Cucumis sativus var. sativus
CG0154	GS53	NA	P1	IVF-CAAS	GS53	Cucumis sativus var. sativus
CG0155	GS54	NA	P1	IVF-CAAS	GS54	Cucumis sativus var. sativus
CG0156	GS60	NA	P1	IVF-CAAS	GS60	Cucumis sativus var. sativus
CG0157	GS83	NA	P1	IVF-CAAS	GS83	Cucumis sativus var. sativus
CG0158	GS91	NA	P1	IVF-CAAS	GS91	Cucumis sativus var. sativus
CG0159	GS92	NA	P1	IVF-CAAS	GS92	Cucumis sativus var. sativus
CG0160	GS94	NA	P1	IVF-CAAS	GS94	Cucumis sativus var. sativus
CG0161	GS67	NA	P1	IVF-CAAS	GS67	Cucumis sativus var. sativus
CG0162	GS68	NA	P1	IVF-CAAS	GS68	Cucumis sativus var. sativus
CG0163	GS69	NA	P1	IVF-CAAS	GS69	Cucumis sativus var. sativus
CG0164	GS76	NA	P1	IVF-CAAS	GS76	Cucumis sativus var. sativus
CG0165	GS1	NA	P1	IVF-CAAS	GS1	Cucumis sativus var. sativus
CG0166	GS11	NA	P1	IVF-CAAS	GS11	Cucumis sativus var. sativus
CG0167	GS13	NA	P1	IVF-CAAS	GS13	Cucumis sativus var. sativus
CG0168	GS14	NA	P1	IVF-CAAS	GS14	Cucumis sativus var. sativus
CG0169	C1456	NA	P1	IVF-CAAS	Ⅱ5A1456	Cucumis sativus var. sativus
CG0170	C1457	NA	P1	IVF-CAAS	Ⅱ5A1457	Cucumis sativus var. sativus
CG0171	C1458	NA	P1	IVF-CAAS	Ⅱ5A1458	Cucumis sativus var. sativus
CG0172	C1459	NA	P1	IVF-CAAS	Ⅱ5A1459	Cucumis sativus var. sativus
CG0173	Imaki	Japan	P1P2	CGN	CGN19757	Cucumis sativus var. sativus
CG0174	Zia Stefga Si	NA	P1P2	CGN	CGN19830	Cucumis sativus var. sativus
CG0175	Tsha 77 (F1) Zozulya	Russian Federation	P1P2	CGN	CGN20928	Cucumis sativus var. sativus
CG0176	CGN22961	NA	P1P2	CGN	CGN22961	Cucumis sativus var. sativus
CG0177	GS163	NA	P1P2	IVF-CAAS	GS163	Cucumis sativus var. sativus
CG0178	Gruner Schnitt	NA	P2	CGN	CGN19535	Cucumis sativus var. sativus
CG0179	Balady	Lebanon	P2	CGN	CGN19549	Cucumis sativus var. sativus
CG0180	Pariser Trauben	NA	P2	CGN	CGN19593	Cucumis sativus var. sativus
CG0181	Russische Trauben	NA	P2	CGN	CGN19595	Cucumis sativus var. sativus
CG0182	China Long	NA	P2	CGN	CGN19603	Cucumis sativus var. sativus
CG0183	Cool and Crisp	South Afica	P2	CGN	CGN19608	Cucumis sativus var. sativus
CG0184	London Long Green	South Afica	P2	CGN	CGN19609	Cucumis sativus var. sativus
CG0185	Fletcher	United States of America	P2	CGN	CGN19611	Cucumis sativus var. sativus
CG0186	CGN19621	NA	P2	CGN	CGN19621	Cucumis sativus var. sativus
CG0187	CGN19622	NA	P2	CGN	CGN19622	Cucumis sativus var. sativus
CG0188	Kiodai Ao Futomaga	Japan	P2	CGN	CGN19627	Cucumis sativus var. sativus
CG0189	CGN19629	NA	P2	CGN	CGN19629	Cucumis sativus var. sativus
CG0190	CGN19630	NA	P2	CGN	CGN19630	Cucumis sativus var. sativus
CG0191	CGN19631	NA	P2	CGN	CGN19631	Cucumis sativus var. sativus
CG0192	CGN19632	NA	P2	CGN	CGN19632	Cucumis sativus var. sativus
CG0193	Highmoor	United States of America	P2	CGN	CGN19635	Cucumis sativus var. sativus
CG0194	CGN19636	Egypt	P2	CGN	CGN19636	Cucumis sativus var. sativus
CG0195	CGN19662	NA	P2	CGN	CGN19662	Cucumis sativus var. sativus
CG0196	CGN19663	NA	P2	CGN	CGN19663	Cucumis sativus var. sativus
CG0197	CGN19664	NA	P2	CGN	CGN19664	Cucumis sativus var. sativus
CG0198	Marketer Long	United States of America	P2	CGN	CGN19668	Cucumis sativus var. sativus
CG0199	CGN19672	NA	P2	CGN	CGN19672	Cucumis sativus var. sativus
CG0200	Ranger	United States of America	P2	CGN	CGN19683	Cucumis sativus var. sativus
CG0201	Rositsa	Bulgaria	P2	CGN	CGN19753	Cucumis sativus var. sativus
CG0202	Abn. Groot	Germany	P2	CGN	CGN19761	Cucumis sativus var. sativus
CG0203	911	NA	P2	CGN	CGN19813	Cucumis sativus var. sativus
CG0204	Tsha 98 (F1) Aprelskii	Russian Federation	P2	CGN	CGN19822	Cucumis sativus var. sativus
CG0205	Delicius	Poland	P2	CGN	CGN19834	Cucumis sativus var. sativus
CG0206	female line	Poland	P2	CGN	CGN19835	Cucumis sativus var. sativus
CG0207	CGN20269	NA	P2	CGN	CGN20269	Cucumis sativus var. sativus
CG0208	MSU-30-75	United States of America	P2	CGN	CGN20869	Cucumis sativus var. sativus
CG0209	MSU-30-75	United States of America	P2	CGN	CGN20871	Cucumis sativus var. sativus
CG0210	CGN20895	NA	P2	CGN	CGN20895	Cucumis sativus var. sativus
CG0211	Lun	NA	P2	CGN	CGN20902	Cucumis sativus var. sativus
CG0212	Roly	Germany	P2	CGN	CGN20904	Cucumis sativus var. sativus
CG0213	Szenzacio	NA	P2	CGN	CGN20911	Cucumis sativus var. sativus
CG0214	Perseus	Sweden	P2	CGN	CGN21587	Cucumis sativus var. sativus
CG0215	Mandarin	United States of America	P2	CGN	CGN21595	Cucumis sativus var. sativus
CG0216	Erfurti	Germany	P2	CGN	CGN21597	Cucumis sativus var. sativus
CG0217	CGN21617	NA	P2	CGN	CGN21617	Cucumis sativus var. sativus
CG0218	CGN21618	NA	P2	CGN	CGN21618	Cucumis sativus var. sativus
CG0219	CGN21619	NA	P2	CGN	CGN21619	Cucumis sativus var. sativus
CG0220	Slicer	NA	P2	CGN	CGN21622	Cucumis sativus var. sativus
CG0221	CGN21633	NA	P2	CGN	CGN21633	Cucumis sativus var. sativus
CG0222	CGN21639	NA	P2	CGN	CGN21639	Cucumis sativus var. sativus
CG0223	Posrednik 97ZH	Poland	P2	CGN	CGN21677	Cucumis sativus var. sativus
CG0224	Robin 50	United States of America	P2	CGN	CGN22230	Cucumis sativus var. sativus
CG0225	P 70	Netherlands	P2	CGN	CGN22277	Cucumis sativus var. sativus
CG0226	CGN22298	Netherlands	P2	CGN	CGN22298	Cucumis sativus var. sativus
CG0227	BN19543	NA	P2	IVF-CAAS	BN19543	Cucumis sativus var. sativus
CG0228	BN19793	NA	P2	IVF-CAAS	BN19793	Cucumis sativus var. sativus
CG0229	BN38	NA	P2	IVF-CAAS	BN38	Cucumis sativus var. sativus
CG0230	BN987	NA	P2	IVF-CAAS	BN987	Cucumis sativus var. sativus
CG0231	G1552	NA	P2	IVF-CAAS	G1552	Cucumis sativus var. sativus
CG0232	G1553	NA	P2	IVF-CAAS	G1553	Cucumis sativus var. sativus
CG0233	G1565	NA	P2	IVF-CAAS	G1565	Cucumis sativus var. sativus
CG0234	G1603	NA	P2	IVF-CAAS	G1603	Cucumis sativus var. sativus
CG0235	GS157	NA	P2	IVF-CAAS	GS157	Cucumis sativus var. sativus
CG0236	3-19	South Afica	P2P3	CGN	CGN20910	Cucumis sativus var. sativus
CG0237	Surinaamse Komkommer	Surinam	P2P3	CGN	CGN20965	Cucumis sativus var. sativus
CG0238	Anthracnose 197087	India	P3	CGN	CGN23089	Cucumis sativus var. sativus
CG0239	G1766	NA	P3	IVF-CAAS	G1766	Cucumis sativus var. sativus
CG1000	Bai Huang Gua	China, Qinhuangdao	P1	IVF-CAAS	Ⅱ5A0456	Cucumis sativus var. sativus
CG1001	Lan Zhou Da Ci Gua	China, Lanzhou	P1	IVF-CAAS	Ⅱ5A0636	Cucumis sativus var. sativus
CG1002	Hei Ci Huang Gua	China, Lanzhou	P1	IVF-CAAS	Ⅱ5A0882	Cucumis sativus var. sativus
CG1003	Huang Gua(Bai Ci)	China, Lanzhou	P1	IVF-CAAS	Ⅱ5A0883	Cucumis sativus var. sativus
CG1004	You Pi Huang Gua	China, Inner Mongolia	P1	IVF-CAAS	Ⅱ5A0894	Cucumis sativus var. sativus
CG1005	Da Hei Huang Gua	China, Inner Mongolia	P1	IVF-CAAS	Ⅱ5A0919	Cucumis sativus var. sativus
CG1006	He Tao Di Huang Gua	China, Inner Mongolia	P1	IVF-CAAS	Ⅱ5A0013	Cucumis sativus var. sativus
CG1007	Jiu Yue Qing Shui Huang Gua	China, Inner Mongolia	P1	IVF-CAAS	Ⅱ5A1094	Cucumis sativus var. sativus
CG1008	Ye Er San Han Huang Gua	China, Inner Mongolia	P1	IVF-CAAS	Ⅱ5A1166	Cucumis sativus var. sativus
CG1009	Ye Er San Shui Huang Gua	China, Inner Mongolia	P1	IVF-CAAS	Ⅱ5A1310	Cucumis sativus var. sativus
CG1010	Wu Lan Hao Te Ye San	China, Inner Mongolia	P1	IVF-CAAS	Ⅱ5A0009	Cucumis sativus var. sativus
CG1011	An Ning Huang Gua	China, Inner Mongolia	P1	IVF-CAAS	Ⅱ5A1165	Cucumis sativus var. sativus
CG1012	Hei You Tiao	China, Inner Mongolia	P1	IVF-CAAS	Ⅱ5A0012	Cucumis sativus var. sativus
CG1013	Si Gua Qing	China, Inner Mongolia	P1	IVF-CAAS	Ⅱ5A1405	Cucumis sativus var. sativus
CG1014	Xian Ming Ci Gua	China, Inner Mongolia	P1	IVF-CAAS	Ⅱ5A0006	Cucumis sativus var. sativus
CG1015	Xi Cai Yuan Ci Gua	China, Inner Mongolia	P1	IVF-CAAS	Ⅱ5A1095	Cucumis sativus var. sativus
CG1016	Wu Li Ying Ci Gua	China, Inner Mongolia	P1	IVF-CAAS	Ⅱ5A1096	Cucumis sativus var. sativus
CG1017	Qiao Kao Ci Gua	China, Inner Mongolia	P1	IVF-CAAS	Ⅱ5A1097	Cucumis sativus var. sativus
CG1018	Hei Wu She	China, Inner Mongolia	P1	IVF-CAAS	Ⅱ5A0011	Cucumis sativus var. sativus
CG1019	Dong Wa Yao Ci Gua	China, Inner Mongolia	P1	IVF-CAAS	Ⅱ5A0005	Cucumis sativus var. sativus
CG1020	Kai Lu Di Huang Gua	China, Inner Mongolia	P1	IVF-CAAS	Ⅱ5A0014	Cucumis sativus var. sativus
CG1021	Kai Lu Huang Gua	China, Inner Mongolia	P1	IVF-CAAS	Ⅱ5A0008	Cucumis sativus var. sativus
CG1022	Bei Jing Xiao Ci	China, Inner Mongolia	P1	IVF-CAAS	Ⅱ5A0010	Cucumis sativus var. sativus
CG1023	Hai La Er Ye Er San	China, Inner Mongolia	P1	IVF-CAAS	Ⅱ5A0007	Cucumis sativus var. sativus
CG1024	Chun Dao Qiu	China, Inner Mongolia	P1	IVF-CAAS	Ⅱ5A1311	Cucumis sativus var. sativus
CG1025	Bang Chui Huang Gua	China, Inner Mongolia	P1	IVF-CAAS	Ⅱ5A1404	Cucumis sativus var. sativus
CG1026	Huang You Tiao	China, Inner Mongolia	P1	IVF-CAAS	Ⅱ5A1309	Cucumis sativus var. sativus
CG1027	Chi Feng Ci Gua	China, Inner Mongolia	P1	IVF-CAAS	Ⅱ5A1093	Cucumis sativus var. sativus
CG1028	Hei Wu Bang	China, Inner Mongolia	P1	IVF-CAAS	Ⅱ5A0640	Cucumis sativus var. sativus
CG1029	7902	China, Inner Mongolia	P1	IVF-CAAS	Ⅱ5A0670	Cucumis sativus var. sativus
CG1030	Bei Jing Da Ci	China, Beijing	P1	IVF-CAAS	Ⅱ5A0137	Cucumis sativus var. sativus
CG1031	Bei Jing Xiao Ci	China, Beijing	P1	IVF-CAAS	Ⅱ5A0141	Cucumis sativus var. sativus
CG1032	Bei Jing Da Ci	China, Beijing	P1	IVF-CAAS	Ⅱ5A0219	Cucumis sativus var. sativus
CG1033	Bei Jing Xiao Ci	China, Beijing	P1	IVF-CAAS	Ⅱ5A0220	Cucumis sativus var. sativus
CG1034	Qing Pi Huang Gua(Bai Ci)	China, Beijing	P1	IVF-CAAS	Ⅱ5A0868	Cucumis sativus var. sativus
CG1035	Qing Tiao Hei Ci Huang Gua	China, Beijing	P1	IVF-CAAS	Ⅱ5A0878	Cucumis sativus var. sativus
CG1036	Bei Jing Da Ci	China, Beijing	P1	IVF-CAAS	Ⅱ5A0884	Cucumis sativus var. sativus
CG1037	Wen Shang Huang Gua	China, Beijing	P1	IVF-CAAS	Ⅱ5A0415	Cucumis sativus var. sativus
CG1038	Si Gua Qing Tiao	China, Beijing	P1	IVF-CAAS	Ⅱ5A0420	Cucumis sativus var. sativus
CG1039	Bian Gua	China, Beijing	P1	IVF-CAAS	Ⅱ5A0443	Cucumis sativus var. sativus
CG1040	Iao Qi Cun Bai	China, Beijing	P1	IVF-CAAS	Ⅱ5A0407	Cucumis sativus var. sativus
CG1041	Xiao Bai Huang Gua	China, Beijing	P1	IVF-CAAS	Ⅱ5A0460	Cucumis sativus var. sativus
CG1042	De Hui Huang Gua	China, Jilin	P1	IVF-CAAS	Ⅱ5A1007	Cucumis sativus var. sativus
CG1043	CM8537-1-2-1-1-0-1-1-1	China, Jilin	P1	IVF-CAAS	Ⅱ5A1269	Cucumis sativus var. sativus
CG1044	Qing Ci	China, Jilin	P1	IVF-CAAS	Ⅱ5A0678	Cucumis sativus var. sativus
CG1045	Gong Zhu Ling Shui Huang Gua(Hei Ci)	China, Jilin	P1	IVF-CAAS	Ⅱ5A0866	Cucumis sativus var. sativus
CG1046	Qing Tiao Huang Gua(Bai Ci)	China, Jilin	P1	IVF-CAAS	Ⅱ5A0877	Cucumis sativus var. sativus
CG1047	Dong Ye Ci Gua	China, Jilin	P1	IVF-CAAS	Ⅱ5A0935	Cucumis sativus var. sativus
CG1048	Han Huang Gua	China, Jilin	P1	IVF-CAAS	Ⅱ5A0969	Cucumis sativus var. sativus
CG1049	Shui Di Huang Gua	China, Jilin	P1	IVF-CAAS	Ⅱ5A0976	Cucumis sativus var. sativus
CG1050	Han Bai	China, Jilin	P1	IVF-CAAS	Ⅱ5A0143	Cucumis sativus var. sativus
CG1051	Jiu Tai 803	China, Jilin	P1	IVF-CAAS	Ⅱ5A1470	Cucumis sativus var. sativus
CG1052	Qian An Ye San	China, Jilin	P1	IVF-CAAS	Ⅱ5A0252	Cucumis sativus var. sativus
CG1053	Gong Zhu Ling Shui Huang Gua	China, Jilin	P1	IVF-CAAS	Ⅱ5A0599	Cucumis sativus var. sativus
CG1054	Duan Xing Zao	China, Jilin	P1	IVF-CAAS	Ⅱ5A0603	Cucumis sativus var. sativus
CG1055	Nong An Ye San	China, Jilin	P1	IVF-CAAS	Ⅱ5A0015	Cucumis sativus var. sativus
CG1056	Shuang Liao Han Huang Gua	China, Jilin	P1	IVF-CAAS	Ⅱ5A0147	Cucumis sativus var. sativus
CG1057	Bai Tou Shuang	China, Jilin	P1	IVF-CAAS	Ⅱ5A0016	Cucumis sativus var. sativus
CG1058	Yong An Bai Tou Shuang	China, Jilin	P1	IVF-CAAS	Ⅱ5A0017	Cucumis sativus var. sativus
CG1059	Si Ping Qiu Gua	China, Jilin	P1	IVF-CAAS	Ⅱ5A0155	Cucumis sativus var. sativus
CG1060	Si Ping Ci Gua	China, Jilin	P1	IVF-CAAS	Ⅱ5A0018	Cucumis sativus var. sativus
CG1061	Da Qing Huang Gua	China, Jilin	P1	IVF-CAAS	Ⅱ5A0148	Cucumis sativus var. sativus
CG1062	Da Qing	China, Jilin	P1	IVF-CAAS	Ⅱ5A0439	Cucumis sativus var. sativus
CG1063	Yan Bian Han Huang Gua	China, Jilin	P1	IVF-CAAS	Ⅱ5A0146	Cucumis sativus var. sativus
CG1064	Lao Lai Shao	China, Jilin	P1	IVF-CAAS	Ⅱ5A1343	Cucumis sativus var. sativus
CG1065	Kai Shan Tun Han Huang Gua	China, Jilin	P1	IVF-CAAS	Ⅱ5A0251	Cucumis sativus var. sativus
CG1066	Tu Men Da Qing Gua	China, Jilin	P1	IVF-CAAS	Ⅱ5A0463	Cucumis sativus var. sativus
CG1067	Long Yin 94-32	China, Jilin	P1	IVF-CAAS	Ⅱ5A1468	Cucumis sativus var. sativus
CG1068	Dong Ye Hu Gua	China, Jilin	P1	IVF-CAAS	Ⅱ5A0605	Cucumis sativus var. sativus
CG1069	Xiao Ba Cha	China, Jilin	P1	IVF-CAAS	Ⅱ5A0595	Cucumis sativus var. sativus
CG1070	Fu Yu Ye San	China, Jilin	P1	IVF-CAAS	Ⅱ5A0596	Cucumis sativus var. sativus
CG1071	Fu Song Ye San	China, Jilin	P1	IVF-CAAS	Ⅱ5A0594	Cucumis sativus var. sativus
CG1072	Hua Dian Ye San	China, Jilin	P1	IVF-CAAS	Ⅱ5A0149	Cucumis sativus var. sativus
CG1073	Yu Shu Da Ci	China, Jilin	P1	IVF-CAAS	Ⅱ5A0153	Cucumis sativus var. sativus
CG1074	Han Shu Ba Cha	China, Jilin	P1	IVF-CAAS	Ⅱ5A0150	Cucumis sativus var. sativus
CG1075	Yong Ji Ye San	China, Jilin	P1	IVF-CAAS	Ⅱ5A0598	Cucumis sativus var. sativus
CG1076	Ye San Han Huang Gua	China, Jilin	P1	IVF-CAAS	Ⅱ5A0144	Cucumis sativus var. sativus
CG1077	Qing Pi Ba Cha	China, Jilin	P1	IVF-CAAS	Ⅱ5A0152	Cucumis sativus var. sativus
CG1078	Pan Shi Huang Gua	China, Jilin	P1	IVF-CAAS	Ⅱ5A0604	Cucumis sativus var. sativus
CG1079	7842-A	China, Jilin	P1	IVF-CAAS	Ⅱ5A1264	Cucumis sativus var. sativus
CG1080	7842-B	China, Jilin	P1	IVF-CAAS	Ⅱ5A1265	Cucumis sativus var. sativus
CG1081	7842-D	China, Jilin	P1	IVF-CAAS	Ⅱ5A1267	Cucumis sativus var. sativus
CG1082	Xuan 9 Hao	China, Jilin	P1	IVF-CAAS	Ⅱ5A1268	Cucumis sativus var. sativus
CG1083	Da Qing7314-2-6-1-1	China, Jilin	P1	IVF-CAAS	Ⅱ5A0156	Cucumis sativus var. sativus
CG1084	Shui Tong Huang Gua	China, Jilin	P1	IVF-CAAS	Ⅱ5A0151	Cucumis sativus var. sativus
CG1085	Bang Huang Gua	China, Jilin	P1	IVF-CAAS	Ⅱ5A0848	Cucumis sativus var. sativus
CG1086	Dang Di Ye San	China, Jilin	P1	IVF-CAAS	Ⅱ5A0849	Cucumis sativus var. sativus
CG1087	7720	China, Jilin	P1	IVF-CAAS	Ⅱ5A1345	Cucumis sativus var. sativus
CG1088	7701-143	China, Jilin	P1	IVF-CAAS	Ⅱ5A1346	Cucumis sativus var. sativus
CG1089	7701-146	China, Jilin	P1	IVF-CAAS	Ⅱ5A1347	Cucumis sativus var. sativus
CG1090	7842-E	China, Jilin	P1	IVF-CAAS	Ⅱ5A1348	Cucumis sativus var. sativus
CG1091	7842-F	China, Jilin	P1	IVF-CAAS	Ⅱ5A1349	Cucumis sativus var. sativus
CG1092	Ji Feng Huang Gua	China, Jilin	P1	IVF-CAAS	Ⅱ5A0847	Cucumis sativus var. sativus
CG1093	Er Hao Huang Gua	China, Jilin	P1	IVF-CAAS	Ⅱ5A1004	Cucumis sativus var. sativus
CG1094	Tong Hua Ye San	China, Jilin	P1	IVF-CAAS	Ⅱ5A0597	Cucumis sativus var. sativus
CG1095	Su Lian Duan Huang Gua	China, Jilin	P1	IVF-CAAS	Ⅱ5A0600	Cucumis sativus var. sativus
CG1096	Su Lian Chang Huang Gua	China, Jilin	P1	IVF-CAAS	Ⅱ5A0601	Cucumis sativus var. sativus
CG1097	Tong Yu Han Huang Gua	China, Jilin	P1	IVF-CAAS	Ⅱ5A0020	Cucumis sativus var. sativus
CG1098	801-9	China, Jilin	P1	IVF-CAAS	Ⅱ5A1140	Cucumis sativus var. sativus
CG1099	801-0	China, Jilin	P1	IVF-CAAS	Ⅱ5A1141	Cucumis sativus var. sativus
CG1100	8534	China, Jilin	P1	IVF-CAAS	Ⅱ5A1142	Cucumis sativus var. sativus
CG1101	8529	China, Jilin	P1	IVF-CAAS	Ⅱ5A1143	Cucumis sativus var. sativus
CG1102	801-3	China, Jilin	P1	IVF-CAAS	Ⅱ5A1144	Cucumis sativus var. sativus
CG1103	801-5	China, Jilin	P1	IVF-CAAS	Ⅱ5A1145	Cucumis sativus var. sativus
CG1104	801-6	China, Jilin	P1	IVF-CAAS	Ⅱ5A1146	Cucumis sativus var. sativus
CG1105	8602	China, Jilin	P1	IVF-CAAS	Ⅱ5A1147	Cucumis sativus var. sativus
CG1106	Ji Tie 2 Hao	China, Jilin	P1	IVF-CAAS	Ⅱ5A1460	Cucumis sativus var. sativus
CG1107	Ji Tie 3 Hao	China, Jilin	P1	IVF-CAAS	Ⅱ5A1461	Cucumis sativus var. sativus
CG1108	Ji Tie 4 Hao	China, Jilin	P1	IVF-CAAS	Ⅱ5A1462	Cucumis sativus var. sativus
CG1109	Ji Tie 6 Hao	China, Jilin	P1	IVF-CAAS	Ⅱ5A1464	Cucumis sativus var. sativus
CG1110	Ji Tie 7 Hao	China, Jilin	P1	IVF-CAAS	Ⅱ5A1465	Cucumis sativus var. sativus
CG1111	Ji Tie 9 Hao	China, Jilin	P1	IVF-CAAS	Ⅱ5A1467	Cucumis sativus var. sativus
CG1112	He Ping Te Xuan	China, Jilin	P1	IVF-CAAS	Ⅱ5A1472	Cucumis sativus var. sativus
CG1113	Xuan4	China, Jilin	P1	IVF-CAAS	Ⅱ5A1473	Cucumis sativus var. sativus
CG1114	Ji Xuan 1Hao	China, Jilin	P1	IVF-CAAS	Ⅱ5A1474	Cucumis sativus var. sativus
CG1115	2611-0-7-1-2	China, Jilin	P1	IVF-CAAS	Ⅱ5A1497	Cucumis sativus var. sativus
CG1116	7314-2-7-4-1	China, Jilin	P1	IVF-CAAS	Ⅱ5A1498	Cucumis sativus var. sativus
CG1117	98-0-0-1-1	China, Jilin	P1	IVF-CAAS	Ⅱ5A1500	Cucumis sativus var. sativus
CG1118	9706-0-3-1-0	China, Jilin	P1	IVF-CAAS	Ⅱ5A1502	Cucumis sativus var. sativus
CG1119	9711-0-2-1-0	China, Jilin	P1	IVF-CAAS	Ⅱ5A1503	Cucumis sativus var. sativus
CG1120	9713-0-8-2-1	China, Jilin	P1	IVF-CAAS	Ⅱ5A1504	Cucumis sativus var. sativus
CG1121	9714-6-3-1-5	China, Jilin	P1	IVF-CAAS	Ⅱ5A1505	Cucumis sativus var. sativus
CG1122	9709-0-3-0-1	China, Jilin	P1	IVF-CAAS	Ⅱ5A1506	Cucumis sativus var. sativus
CG1123	Chang Chun Ye San	China, Jilin	P1	IVF-CAAS	Ⅱ5A0154	Cucumis sativus var. sativus
CG1124	Jiu Yue Qing	China, Jilin	P1	IVF-CAAS	Ⅱ5A0019	Cucumis sativus var. sativus
CG1125	Chang Chun Mi Ci	China, Jilin	P1	IVF-CAAS	Ⅱ5A0021	Cucumis sativus var. sativus
CG1126	Chun Dao Qiu	China, Jilin	P1	IVF-CAAS	Ⅱ5A0602	Cucumis sativus var. sativus
CG1127	Chang Chun Wu Ci	China, Jilin	P1	IVF-CAAS	Ⅱ5A0608	Cucumis sativus var. sativus
CG1128	Ba Cha	China, Jilin	P1	IVF-CAAS	Ⅱ5A0145	Cucumis sativus var. sativus
CG1129	Ha Er Bin Da Qing(Hei Ci)	China, Harbin	P1	IVF-CAAS	Ⅱ5A0869	Cucumis sativus var. sativus
CG1130	Ha Er Bin Huang Gua(Bai Ci)	China, Harbin	P1	IVF-CAAS	Ⅱ5A0881	Cucumis sativus var. sativus
CG1131	Jin-1-7	China, Dalian	P1	IVF-CAAS	Ⅱ5A0641	Cucumis sativus var. sativus
CG1132	Tian Shui Ben Di Lv Bai	China, Gansu	P1	IVF-CAAS	Ⅱ5A0667	Cucumis sativus var. sativus
CG1133	Sheng Fang Chun Huang Gua	China, Tianjin	P1	IVF-CAAS	Ⅱ5A1055	Cucumis sativus var. sativus
CG1134	Jin Bei Huang Gua	China, Tianjin	P1	IVF-CAAS	Ⅱ5A0926	Cucumis sativus var. sativus
CG1135	Sheng Fang Er Kuai	China, Tianjin	P1	IVF-CAAS	Ⅱ5A0140	Cucumis sativus var. sativus
CG1136	Di Pa Huang Gua	China, Tianjin	P1	IVF-CAAS	Ⅱ5A1060	Cucumis sativus var. sativus
CG1137	Chang Chun Huang Gua	China, Tianjin	P1	IVF-CAAS	Ⅱ5A0650	Cucumis sativus var. sativus
CG1138	Jie Jie Shuang	China, Tianjin	P1	IVF-CAAS	Ⅱ5A0674	Cucumis sativus var. sativus
CG1139	Jin Yan Si Hao	China, Tianjin	P1	IVF-CAAS	Ⅱ5A0680	Cucumis sativus var. sativus
CG1140	Jin Yan Yi Hao	China, Tianjin	P1	IVF-CAAS	Ⅱ5A0696	Cucumis sativus var. sativus
CG1141	Jin Yan San Hao	China, Tianjin	P1	IVF-CAAS	Ⅱ5A0700	Cucumis sativus var. sativus
CG1142	H13	China, Tianjin	P1	IVF-CAAS	Ⅱ5A0710	Cucumis sativus var. sativus
CG1143	Jin Yan 5 Hao	China, Tianjin	P1	IVF-CAAS	Ⅱ5A0002	Cucumis sativus var. sativus
CG1144	Jin Yan 6 Hao	China, Tianjin	P1	IVF-CAAS	Ⅱ5A0003	Cucumis sativus var. sativus
CG1145	Jin Yan 7 Hao	China, Tianjin	P1	IVF-CAAS	Ⅱ5A0004	Cucumis sativus var. sativus
CG1146	54465	China, Tianjin	P1	IVF-CAAS	Ⅱ5A1069	Cucumis sativus var. sativus
CG1147	Duan Xing Zao	China, Tianjin	P1	IVF-CAAS	Ⅱ5A0948	Cucumis sativus var. sativus
CG1148	You Tiao	China, Tianjin	P1	IVF-CAAS	Ⅱ5A0989	Cucumis sativus var. sativus
CG1149	Tong Liao Mi Ci	China, Tianjin	P1	IVF-CAAS	Ⅱ5A1164	Cucumis sativus var. sativus
CG1150	Ye San Qing	China, Tianjin	P1	IVF-CAAS	Ⅱ5A0891	Cucumis sativus var. sativus
CG1151	Ji Xian Huang Gua	China, Tianjin	P1	IVF-CAAS	Ⅱ5A0924	Cucumis sativus var. sativus
CG1152	Ji Xian Di Huang Gua	China, Tianjin	P1	IVF-CAAS	Ⅱ5A0941	Cucumis sativus var. sativus
CG1153	Ye Er San Mi Ci	China, Tianjin	P1	IVF-CAAS	Ⅱ5A0139	Cucumis sativus var. sativus
CG1154	Bang Zi Gua	China, Tianjin	P1	IVF-CAAS	Ⅱ5A0898	Cucumis sativus var. sativus
CG1155	Zi Xuan 2 Hao	China, Tianjin	P1	IVF-CAAS	Ⅱ5A1051	Cucumis sativus var. sativus
CG1156	Wen Shang Huang Gua	China, Tianjin	P1	IVF-CAAS	Ⅱ5A1163	Cucumis sativus var. sativus
CG1157	Zao Gua	China, Tianjin	P1	IVF-CAAS	Ⅱ5A1066	Cucumis sativus var. sativus
CG1158	Pi Guang Huang Gua	China, Tianjin	P1	IVF-CAAS	Ⅱ5A1067	Cucumis sativus var. sativus
CG1159	Hao Yang Huang Gua	China, Tianjin	P1	IVF-CAAS	Ⅱ5A1061	Cucumis sativus var. sativus
CG1160	Bei Jing Jie Tou	China, Ningxia	P1	IVF-CAAS	Ⅱ5A0136	Cucumis sativus var. sativus
CG1161	Huang Duan Bang Zi	China, Yinchuan	P1	IVF-CAAS	Ⅱ5A1139	Cucumis sativus var. sativus
CG1162	♀ Xing Xi 1-7-10	China, Yinchuan	P1	IVF-CAAS	Ⅱ5A1216	Cucumis sativus var. sativus
CG1163	Ci Xing Xi 87-4-12	China, Yinchuan	P1	IVF-CAAS	Ⅱ5A1218	Cucumis sativus var. sativus
CG1164	Ci Xing Xi 87	China, Yinchuan	P1	IVF-CAAS	Ⅱ5A1219	Cucumis sativus var. sativus
CG1165	Q35	China, Yinchuan	P1	IVF-CAAS	Ⅱ5A1220	Cucumis sativus var. sativus
CG1166	Q52	China, Yinchuan	P1	IVF-CAAS	Ⅱ5A1221	Cucumis sativus var. sativus
CG1167	Q60	China, Yinchuan	P1	IVF-CAAS	Ⅱ5A1222	Cucumis sativus var. sativus
CG1168	25-5B-9	China, Yinchuan	P1	IVF-CAAS	Ⅱ5A1223	Cucumis sativus var. sativus
CG1169	Q60XN9-1-2	China, Yinchuan	P1	IVF-CAAS	Ⅱ5A1224	Cucumis sativus var. sativus
CG1170	Q60XN9-1-1	China, Yinchuan	P1	IVF-CAAS	Ⅱ5A1225	Cucumis sativus var. sativus
CG1171	Mai Huang Gua	China, Yinchuan	P1	IVF-CAAS	Ⅱ5A1226	Cucumis sativus var. sativus
CG1172	Wu Zhong Xi Huang Gua	China, Yinchuan	P1	IVF-CAAS	Ⅱ5A1227	Cucumis sativus var. sativus
CG1173	San Gua	China, Yinchuan	P1	IVF-CAAS	Ⅱ5A1228	Cucumis sativus var. sativus
CG1174	Xi Bei 7 Hao	China, Yinchuan	P1	IVF-CAAS	Ⅱ5A1229	Cucumis sativus var. sativus
CG1175	Hei Han Tui	China, Yinchuan	P1	IVF-CAAS	Ⅱ5A1230	Cucumis sativus var. sativus
CG1176	Ning Huang 1 Hao	China, Yinchuan	P1	IVF-CAAS	Ⅱ5A1231	Cucumis sativus var. sativus
CG1177	Ning Huang 2 Hao	China, Yinchuan	P1	IVF-CAAS	Ⅱ5A1232	Cucumis sativus var. sativus
CG1178	Ning Huang 3 Hao	China, Yinchuan	P1	IVF-CAAS	Ⅱ5A1233	Cucumis sativus var. sativus
CG1179	N9-1-1	China, Yinchuan	P1	IVF-CAAS	Ⅱ5A1234	Cucumis sativus var. sativus
CG1180	N9-1-11	China, Yinchuan	P1	IVF-CAAS	Ⅱ5A1235	Cucumis sativus var. sativus
CG1181	G-1F1	China, Yinchuan	P1	IVF-CAAS	Ⅱ5A1236	Cucumis sativus var. sativus
CG1182	Lang Li Zao	China, Yinchuan	P1	IVF-CAAS	Ⅱ5A1237	Cucumis sativus var. sativus
CG1183	Xi Xuan 78	China, Yinchuan	P1	IVF-CAAS	Ⅱ5A1359	Cucumis sativus var. sativus
CG1184	31 Hao	China, Yinchuan	P1	IVF-CAAS	Ⅱ5A1360	Cucumis sativus var. sativus
CG1185	40 Hao	China, Yinchuan	P1	IVF-CAAS	Ⅱ5A1361	Cucumis sativus var. sativus
CG1186	Q89-2-26	China, Yinchuan	P1	IVF-CAAS	Ⅱ5A1362	Cucumis sativus var. sativus
CG1187	Q92	China, Yinchuan	P1	IVF-CAAS	Ⅱ5A1363	Cucumis sativus var. sativus
CG1188	G-1	China, Yinchuan	P1	IVF-CAAS	Ⅱ5A1364	Cucumis sativus var. sativus
CG1189	79-18 Ci Huang Gua	China, Yinchuan	P1	IVF-CAAS	Ⅱ5A1365	Cucumis sativus var. sativus
CG1190	45-7-1	China, Yinchuan	P1	IVF-CAAS	Ⅱ5A1367	Cucumis sativus var. sativus
CG1191	Wang Jia Rou Huang Gua	China, Yinchuan	P1	IVF-CAAS	Ⅱ5A1368	Cucumis sativus var. sativus
CG1192	Ping Li Huang Gua	China, Yinchuan	P1	IVF-CAAS	Ⅱ5A1369	Cucumis sativus var. sativus
CG1193	Xi Bei 1 Hao	China, Yinchuan	P1	IVF-CAAS	Ⅱ5A1370	Cucumis sativus var. sativus
CG1194	759	China, Yinchuan	P1	IVF-CAAS	Ⅱ5A1371	Cucumis sativus var. sativus
CG1195	761 Kang Bing Huang Gua	China, Yinchuan	P1	IVF-CAAS	Ⅱ5A1372	Cucumis sativus var. sativus
CG1196	864 Hao	China, Yinchuan	P1	IVF-CAAS	Ⅱ5A1373	Cucumis sativus var. sativus
CG1197	791	China, Yinchuan	P1	IVF-CAAS	Ⅱ5A1374	Cucumis sativus var. sativus
CG1198	Yin Chuan Mi Ci Huang Gua	China, Yinchuan	P1	IVF-CAAS	Ⅱ5A1375	Cucumis sativus var. sativus
CG1199	Jing Yuan Jia Huang Gua	China, Yinchuan	P1	IVF-CAAS	Ⅱ5A1376	Cucumis sativus var. sativus
CG1200	Jing Yuan Di Huang Gua	China, Yinchuan	P1	IVF-CAAS	Ⅱ5A1377	Cucumis sativus var. sativus
CG1201	Ye San Han Huang Gua	China, Yinchuan	P1	IVF-CAAS	Ⅱ5A1378	Cucumis sativus var. sativus
CG1202	An Yang Ci Gua	China, Yinchuan	P1	IVF-CAAS	Ⅱ5A1379	Cucumis sativus var. sativus
CG1203	He Nan Ci Gua	China, Yinchuan	P1	IVF-CAAS	Ⅱ5A1420	Cucumis sativus var. sativus
CG1204	An Ning Ci Gua	China, Yinchuan	P1	IVF-CAAS	Ⅱ5A1421	Cucumis sativus var. sativus
CG1205	Jin Xi 784	China, Yinchuan	P1	IVF-CAAS	Ⅱ5A1422	Cucumis sativus var. sativus
CG1206	Ye Er San Huang Gua	China, Yinchuan	P1	IVF-CAAS	Ⅱ5A1423	Cucumis sativus var. sativus
CG1207	Ci Huang Gua	China, Yinchuan	P1	IVF-CAAS	Ⅱ5A0405	Cucumis sativus var. sativus
CG1208	Yin Chuan You Tiao	China, Yinchuan	P1	IVF-CAAS	Ⅱ5A0406	Cucumis sativus var. sativus
CG1209	Bei Jing Xiao Ci Huang Gua	China, Yinchuan	P1	IVF-CAAS	Ⅱ5A0846	Cucumis sativus var. sativus
CG1210	Qi Cun Zi	China, Shanhai Pass	P1	IVF-CAAS	Ⅱ5A0963	Cucumis sativus var. sativus
CG1211	Han Huang Gua	China, Shanxi	P1	IVF-CAAS	Ⅱ5A0100	Cucumis sativus var. sativus
CG1212	Huang Gua	China, Shanxi	P1	IVF-CAAS	Ⅱ5A0101	Cucumis sativus var. sativus
CG1213	Yi Tiao Long	China, Shanxi	P1	IVF-CAAS	Ⅱ5A0102	Cucumis sativus var. sativus
CG1214	Dong Zhi Huang Gua	China, Shanxi	P1	IVF-CAAS	Ⅱ5A1123	Cucumis sativus var. sativus
CG1215	Di Huang Gua	China, Shanxi	P1	IVF-CAAS	Ⅱ5A1396	Cucumis sativus var. sativus
CG1216	You Yi Yi Hao	China, Shanxi	P1	IVF-CAAS	Ⅱ5A0648	Cucumis sativus var. sativus
CG1217	Han Di Cai Huang Gua	China, Shanxi	P1	IVF-CAAS	Ⅱ5A0089	Cucumis sativus var. sativus
CG1218	Chang Chun Ci	China, Shanxi	P1	IVF-CAAS	Ⅱ5A0895	Cucumis sativus var. sativus
CG1219	Qi Hao	China, Shanxi	P1	IVF-CAAS	Ⅱ5A0908	Cucumis sativus var. sativus
CG1220	Huang Gua	China, Shanxi	P1	IVF-CAAS	Ⅱ5A0092	Cucumis sativus var. sativus
CG1221	Xi Ning Qiu Gua	China, Shanxi	P1	IVF-CAAS	Ⅱ5A0929	Cucumis sativus var. sativus
CG1222	Huang Gua	China, Shanxi	P1	IVF-CAAS	Ⅱ5A0093	Cucumis sativus var. sativus
CG1223	Ye Er San	China, Shanxi	P1	IVF-CAAS	Ⅱ5A0094	Cucumis sativus var. sativus
CG1224	Xiao Ba Cha	China, Shanxi	P1	IVF-CAAS	Ⅱ5A0095	Cucumis sativus var. sativus
CG1225	Huang Gua	China, Shanxi	P1	IVF-CAAS	Ⅱ5A0096	Cucumis sativus var. sativus
CG1226	Huang Kou Huang Gua	China, Shanxi	P1	IVF-CAAS	Ⅱ5A0099	Cucumis sativus var. sativus
CG1227	Bang Chui Huang Gua	China, Shanxi	P1	IVF-CAAS	Ⅱ5A0187	Cucumis sativus var. sativus
CG1228	Di Huang Gua	China, Shanxi	P1	IVF-CAAS	Ⅱ5A0572	Cucumis sativus var. sativus
CG1229	Xiang Ning Ben Di Huang Gua	China, Shanxi	P1	IVF-CAAS	Ⅱ5A0573	Cucumis sativus var. sativus
CG1230	Jiao Cheng Huang Gua	China, Shanxi	P1	IVF-CAAS	Ⅱ5A0198	Cucumis sativus var. sativus
CG1231	Bao De Ben Di Huang Gua	China, Shanxi	P1	IVF-CAAS	Ⅱ5A0563	Cucumis sativus var. sativus
CG1232	Hou Ma Ben Di Huang Gua	China, Shanxi	P1	IVF-CAAS	Ⅱ5A0562	Cucumis sativus var. sativus
CG1233	Yuan Ping Huang Gua	China, Shanxi	P1	IVF-CAAS	Ⅱ5A0199	Cucumis sativus var. sativus
CG1234	732	China, Shanxi	P1	IVF-CAAS	Ⅱ5A0201	Cucumis sativus var. sativus
CG1235	Ben Di Huang Gua	China, Shanxi	P1	IVF-CAAS	Ⅱ5A0189	Cucumis sativus var. sativus
CG1236	Da Ning Ben Di Huang Gua	China, Shanxi	P1	IVF-CAAS	Ⅱ5A0564	Cucumis sativus var. sativus
CG1237	Hei Wu She Da Ci	China, Shanxi	P1	IVF-CAAS	Ⅱ5A0175	Cucumis sativus var. sativus
CG1238	Tai Yuan Ben Di Huang Gua	China, Shanxi	P1	IVF-CAAS	Ⅱ5A0565	Cucumis sativus var. sativus
CG1239	Ben Di Huang Gua	China, Shanxi	P1	IVF-CAAS	Ⅱ5A0255	Cucumis sativus var. sativus
CG1240	Zuo Yu Di Huang Gua	China, Shanxi	P1	IVF-CAAS	Ⅱ5A0568	Cucumis sativus var. sativus
CG1241	Ci Huang Gua	China, Shanxi	P1	IVF-CAAS	Ⅱ5A0200	Cucumis sativus var. sativus
CG1242	Fang Shan Ben Di Huang Gua	China, Shanxi	P1	IVF-CAAS	Ⅱ5A0561	Cucumis sativus var. sativus
CG1243	Hei Wu She	China, Shanxi	P1	IVF-CAAS	Ⅱ5A0180	Cucumis sativus var. sativus
CG1244	Lao Huang Gua	China, Shanxi	P1	IVF-CAAS	Ⅱ5A0185	Cucumis sativus var. sativus
CG1245	Dong Bei Huang Gua	China, Shanxi	P1	IVF-CAAS	Ⅱ5A0186	Cucumis sativus var. sativus
CG1246	Wu Xiang Hei Wu She	China, Shanxi	P1	IVF-CAAS	Ⅱ5A0571	Cucumis sativus var. sativus
CG1247	Huang Tie Wu Ci Gua(Da Ci Huang Gua)	China, Shanxi	P1	IVF-CAAS	Ⅱ5A0197	Cucumis sativus var. sativus
CG1248	Shan Xi Yong Ji	China, Shanxi	P1	IVF-CAAS	Ⅱ5A0453	Cucumis sativus var. sativus
CG1249	Shan Dong Da Ci Gua	China, Shanxi	P1	IVF-CAAS	Ⅱ5A0196	Cucumis sativus var. sativus
CG1250	Bai Ci Huang Gua	China, Shanxi	P1	IVF-CAAS	Ⅱ5A0184	Cucumis sativus var. sativus
CG1251	Qin Yuan Ben Di Huang Gua	China, Shanxi	P1	IVF-CAAS	Ⅱ5A0566	Cucumis sativus var. sativus
CG1252	Hei Wu She	China, Shanxi	P1	IVF-CAAS	Ⅱ5A0174	Cucumis sativus var. sativus
CG1253	Hei Ba Ci	China, Shanxi	P1	IVF-CAAS	Ⅱ5A0183	Cucumis sativus var. sativus
CG1254	Ben Di Huang Gua	China, Shanxi	P1	IVF-CAAS	Ⅱ5A0193	Cucumis sativus var. sativus
CG1255	Ben Di Huang Gua	China, Shanxi	P1	IVF-CAAS	Ⅱ5A0190	Cucumis sativus var. sativus
CG1256	Hei Wu She	China, Shanxi	P1	IVF-CAAS	Ⅱ5A0178	Cucumis sativus var. sativus
CG1257	Hei Wu She	China, Shanxi	P1	IVF-CAAS	Ⅱ5A0177	Cucumis sativus var. sativus
CG1258	Da Ba Cha	China, Shanxi	P1	IVF-CAAS	Ⅱ5A0182	Cucumis sativus var. sativus
CG1259	Qiu Huang Gua	China, Shanxi	P1	IVF-CAAS	Ⅱ5A0194	Cucumis sativus var. sativus
CG1260	Yi Cheng Ben Di Huang Gua	China, Shanxi	P1	IVF-CAAS	Ⅱ5A0574	Cucumis sativus var. sativus
CG1261	Di Man Huang Gua	China, Shanxi	P1	IVF-CAAS	Ⅱ5A0559	Cucumis sativus var. sativus
CG1262	Ben Di Huang Gua	China, Shanxi	P1	IVF-CAAS	Ⅱ5A0191	Cucumis sativus var. sativus
CG1263	Hei You Tiao	China, Shanxi	P1	IVF-CAAS	Ⅱ5A0575	Cucumis sativus var. sativus
CG1264	Hei You Tiao	China, Shanxi	P1	IVF-CAAS	Ⅱ5A0576	Cucumis sativus var. sativus
CG1265	Hei Wu She	China, Shanxi	P1	IVF-CAAS	Ⅱ5A0179	Cucumis sativus var. sativus
CG1266	Da Ci Gua	China, Shanxi	P1	IVF-CAAS	Ⅱ5A0195	Cucumis sativus var. sativus
CG1267	Wen Shang Ci Gua	China, Shanxi	P1	IVF-CAAS	Ⅱ5A0569	Cucumis sativus var. sativus
CG1268	Za Jiao Huang Gua	China, Shanxi	P1	IVF-CAAS	Ⅱ5A0560	Cucumis sativus var. sativus
CG1269	Hei Wu Chi	China, Shanxi	P1	IVF-CAAS	Ⅱ5A0181	Cucumis sativus var. sativus
CG1270	Yi Jing Huang Gua	China, Shanxi	P1	IVF-CAAS	Ⅱ5A0567	Cucumis sativus var. sativus
CG1271	Xi Huang Gua	China, Shanxi	P1	IVF-CAAS	Ⅱ5A0115	Cucumis sativus var. sativus
CG1272	Ben Di Huang Gua	China, Shanxi	P1	IVF-CAAS	Ⅱ5A0192	Cucumis sativus var. sativus
CG1273	Ben Di Huang Gua	China, Shanxi	P1	IVF-CAAS	Ⅱ5A0036	Cucumis sativus var. sativus
CG1274	Biao Ci Ben Di Huang Gua	China, Chengde	P1	IVF-CAAS	Ⅱ5A0656	Cucumis sativus var. sativus
CG1275	Yan Tai Wan Shu	China, Chengde	P1	IVF-CAAS	Ⅱ5A0685	Cucumis sativus var. sativus
CG1276	Nan Jing Zao Huang Gua	China, Sinkiang	P1	IVF-CAAS	Ⅱ5A0489	Cucumis sativus var. sativus
CG1277	Yi Li Zao Huang Gua	China, Sinkiang	P1	IVF-CAAS	Ⅱ5A0490	Cucumis sativus var. sativus
CG1278	Lan Zhou Qing Tiao Huang Gua	China, Sinkiang	P1	IVF-CAAS	Ⅱ5A0491	Cucumis sativus var. sativus
CG1279	C492	China, Sinkiang	P1	IVF-CAAS	Ⅱ5A0492	Cucumis sativus var. sativus
CG1280	Li Ming She Huang Gua(Bai Ci)	China, Sinkiang	P1	IVF-CAAS	Ⅱ5A0870	Cucumis sativus var. sativus
CG1281	Min Zhu She Huang Gua(Hei Ci)	China, Sinkiang	P1	IVF-CAAS	Ⅱ5A0887	Cucumis sativus var. sativus
CG1282	Shen Huang Pi Huang Gua	China, Sinkiang	P1	IVF-CAAS	Ⅱ5A1167	Cucumis sativus var. sativus
CG1283	Hei Pi Huang Gua	China, Sinkiang	P1	IVF-CAAS	Ⅱ5A1169	Cucumis sativus var. sativus
CG1284	Lang Li Zao Huang Gua(Hei Ci)	China, Sinkiang	P1	IVF-CAAS	Ⅱ5A0872	Cucumis sativus var. sativus
CG1285	Lang Li Ma Pi Hei Ci	China, Sinkiang	P1	IVF-CAAS	Ⅱ5A0873	Cucumis sativus var. sativus
CG1286	Shen Huang Pi Huang Gua	China, Sinkiang	P1	IVF-CAAS	Ⅱ5A1168	Cucumis sativus var. sativus
CG1287	Yi Wo Feng Huang Gua(Hei Ci)	China, Sinkiang	P1	IVF-CAAS	Ⅱ5A0885	Cucumis sativus var. sativus
CG1288	Yi Wo Feng Qing Pi(Hei Ci)	China, Sinkiang	P1	IVF-CAAS	Ⅱ5A0886	Cucumis sativus var. sativus
CG1289	Chao Xian Huang Gua	China, Shenyang	P1	IVF-CAAS	Ⅱ5A0697	Cucumis sativus var. sativus
CG1290	Yu Yu Er Hao	China, Hebei	P1	IVF-CAAS	Ⅱ5A0649	Cucumis sativus var. sativus
CG1291	Wu Ji Di Huang Gua	China, Hebei	P1	IVF-CAAS	Ⅱ5A1006	Cucumis sativus var. sativus
CG1292	He Cha Huang Gua	China, Hebei	P1	IVF-CAAS	Ⅱ5A1008	Cucumis sativus var. sativus
CG1293	Cang Zhou Huang Gua	China, Hebei	P1	IVF-CAAS	Ⅱ5A1075	Cucumis sativus var. sativus
CG1294	Zheng Ding Huang Gua	China, Hebei	P1	IVF-CAAS	Ⅱ5A1120	Cucumis sativus var. sativus
CG1295	Tian Jin You Tiao	China, Hebei	P1	IVF-CAAS	Ⅱ5A1207	Cucumis sativus var. sativus
CG1296	Ye San	China, Hebei	P1	IVF-CAAS	Ⅱ5A1244	Cucumis sativus var. sativus
CG1297	Jiu Di Pa	China, Hebei	P1	IVF-CAAS	Ⅱ5A1245	Cucumis sativus var. sativus
CG1298	Han Huang Gua	China, Hebei	P1	IVF-CAAS	Ⅱ5A1246	Cucumis sativus var. sativus
CG1299	Lv Huang Gua	China, Hebei	P1	IVF-CAAS	Ⅱ5A1247	Cucumis sativus var. sativus
CG1300	Han Huang Gua	China, Hebei	P1	IVF-CAAS	Ⅱ5A1248	Cucumis sativus var. sativus
CG1301	Lv Huang Gua	China, Hebei	P1	IVF-CAAS	Ⅱ5A1394	Cucumis sativus var. sativus
CG1302	Dang Di Bai Huang Gua	China, Hebei	P1	IVF-CAAS	Ⅱ5A0643	Cucumis sativus var. sativus
CG1303	He Bei Yu 8 Hao	China, Hebei	P1	IVF-CAAS	Ⅱ5A0684	Cucumis sativus var. sativus
CG1304	Shou Guang Qiu Gua	China, Hebei	P1	IVF-CAAS	Ⅱ5A0916	Cucumis sativus var. sativus
CG1305	Zhang Jia Kou Huang Gua	China, Hebei	P1	IVF-CAAS	Ⅱ5A0928	Cucumis sativus var. sativus
CG1306	Chang Chun Wu Ci	China, Hebei	P1	IVF-CAAS	Ⅱ5A0934	Cucumis sativus var. sativus
CG1307	Lu Di Huang Gua	China, Hebei	P1	IVF-CAAS	Ⅱ5A0939	Cucumis sativus var. sativus
CG1308	Ye Er San	China, Hebei	P1	IVF-CAAS	Ⅱ5A0975	Cucumis sativus var. sativus
CG1309	Chun Dao Qiu	China, Hebei	P1	IVF-CAAS	Ⅱ5A0982	Cucumis sativus var. sativus
CG1310	Zheng Ding Qiu Dao Qiu	China, Hebei	P1	IVF-CAAS	Ⅱ5A0983	Cucumis sativus var. sativus
CG1311	Dong Guang Di Pa Gua	China, Hebei	P1	IVF-CAAS	Ⅱ5A0721	Cucumis sativus var. sativus
CG1312	Feng Nan Yi Chi Qing	China, Hebei	P1	IVF-CAAS	Ⅱ5A1039	Cucumis sativus var. sativus
CG1313	Ye San Qiu Huang Gua	China, Hebei	P1	IVF-CAAS	Ⅱ5A0714	Cucumis sativus var. sativus
CG1314	Pi Xiao Ci Bai Huang Gua	China, Hebei	P1	IVF-CAAS	Ⅱ5A0715	Cucumis sativus var. sativus
CG1315	Man Jia Hui Huang Gua	China, Hebei	P1	IVF-CAAS	Ⅱ5A0716	Cucumis sativus var. sativus
CG1316	Wei Mao Huang Gua	China, Hebei	P1	IVF-CAAS	Ⅱ5A0724	Cucumis sativus var. sativus
CG1317	Bao Ding Huang Gua	China, Hebei	P1	IVF-CAAS	Ⅱ5A0728	Cucumis sativus var. sativus
CG1318	Yang Kang	China, Hebei	P1	IVF-CAAS	Ⅱ5A1213	Cucumis sativus var. sativus
CG1319	Da Xiao Bai Qicun	China, Hebei	P1	IVF-CAAS	Ⅱ5A0719	Cucumis sativus var. sativus
CG1320	Ben Di Huang Gua	China, Hebei	P1	IVF-CAAS	Ⅱ5A0733	Cucumis sativus var. sativus
CG1321	Bai Pi Huang Gua	China, Hebei	P1	IVF-CAAS	Ⅱ5A0114	Cucumis sativus var. sativus
CG1322	Qian Qi Li Huang Gua	China, Hebei	P1	IVF-CAAS	Ⅱ5A1087	Cucumis sativus var. sativus
CG1323	Nan Pi Di Pa Huang Gua	China, Hebei	P1	IVF-CAAS	Ⅱ5A0727	Cucumis sativus var. sativus
CG1324	Tang Qiu Yi Hao	China, Hebei	P1	IVF-CAAS	Ⅱ5A1488	Cucumis sativus var. sativus
CG1325	Tang Shan Qiu Gua	China, Hebei	P1	IVF-CAAS	Ⅱ5A1038	Cucumis sativus var. sativus
CG1326	Da Qiu Zi	China, Hebei	P1	IVF-CAAS	Ⅱ5A0313	Cucumis sativus var. sativus
CG1327	Lao Lai Shao Qiu Huang Gua	China, Hebei	P1	IVF-CAAS	Ⅱ5A0711	Cucumis sativus var. sativus
CG1328	Ye Er San Huang Gua	China, Hebei	P1	IVF-CAAS	Ⅱ5A0712	Cucumis sativus var. sativus
CG1329	Da Qing Tiao	China, Hebei	P1	IVF-CAAS	Ⅱ5A0315	Cucumis sativus var. sativus
CG1330	Xian Huang Gua	China, Hebei	P1	IVF-CAAS	Ⅱ5A0736	Cucumis sativus var. sativus
CG1331	Da Ming Chun Huang Gua	China, Hebei	P1	IVF-CAAS	Ⅱ5A1113	Cucumis sativus var. sativus
CG1332	Ye Li San Huang Gua	China, Hebei	P1	IVF-CAAS	Ⅱ5A0755	Cucumis sativus var. sativus
CG1333	Jia Huang Gua	China, Hebei	P1	IVF-CAAS	Ⅱ5A0722	Cucumis sativus var. sativus
CG1334	Meng Xun Di Pa Gua	China, Hebei	P1	IVF-CAAS	Ⅱ5A1041	Cucumis sativus var. sativus
CG1335	Wan Xian Haung Gua	China, Hebei	P1	IVF-CAAS	Ⅱ5A0726	Cucumis sativus var. sativus
CG1336	Huang Gua	China, Hebei	P1	IVF-CAAS	Ⅱ5A0104	Cucumis sativus var. sativus
CG1337	Qiu Huang Gua	China, Hebei	P1	IVF-CAAS	Ⅱ5A0732	Cucumis sativus var. sativus
CG1338	Bai Pi Qiu Huang Gua	China, Hebei	P1	IVF-CAAS	Ⅱ5A0720	Cucumis sativus var. sativus
CG1339	Bai Huang Gua	China, Hebei	P1	IVF-CAAS	Ⅱ5A1086	Cucumis sativus var. sativus
CG1340	Huang Gua	China, Hebei	P1	IVF-CAAS	Ⅱ5A0112	Cucumis sativus var. sativus
CG1341	Di Chuan Huang Gua	China, Hebei	P1	IVF-CAAS	Ⅱ5A0753	Cucumis sativus var. sativus
CG1342	Di Jia Huang Gua	China, Hebei	P1	IVF-CAAS	Ⅱ5A0754	Cucumis sativus var. sativus
CG1343	Huang Gua	China, Hebei	P1	IVF-CAAS	Ⅱ5A0750	Cucumis sativus var. sativus
CG1344	Ci Huang Gua	China, Hebei	P1	IVF-CAAS	Ⅱ5A0751	Cucumis sativus var. sativus
CG1345	Zhu Gu Chun Dao Qiu	China, Hebei	P1	IVF-CAAS	Ⅱ5A0440	Cucumis sativus var. sativus
CG1346	Ye Huang Gua	China, Hebei	P1	IVF-CAAS	Ⅱ5A0466	Cucumis sativus var. sativus
CG1347	He Jian Huang Gua	China, Hebei	P1	IVF-CAAS	Ⅱ5A1042	Cucumis sativus var. sativus
CG1348	Ci Huang Gua	China, Hebei	P1	IVF-CAAS	Ⅱ5A0729	Cucumis sativus var. sativus
CG1349	Da Bai Ci Huang Gua	China, Hebei	P1	IVF-CAAS	Ⅱ5A0739	Cucumis sativus var. sativus
CG1350	Xiao Bai Ci Huang Gua	China, Hebei	P1	IVF-CAAS	Ⅱ5A0741	Cucumis sativus var. sativus
CG1351	Huang Gua	China, Hebei	P1	IVF-CAAS	Ⅱ5A0103	Cucumis sativus var. sativus
CG1352	Tie Pi Haung Gua	China, Hebei	P1	IVF-CAAS	Ⅱ5A0312	Cucumis sativus var. sativus
CG1353	Bang Chui Gua	China, Hebei	P1	IVF-CAAS	Ⅱ5A0316	Cucumis sativus var. sativus
CG1354	Dong Bei Huang Gua	China, Hebei	P1	IVF-CAAS	Ⅱ5A0319	Cucumis sativus var. sativus
CG1355	Dao Ba Qi	China, Hebei	P1	IVF-CAAS	Ⅱ5A0318	Cucumis sativus var. sativus
CG1356	Qing Qi Cun Qiu Gua	China, Hebei	P1	IVF-CAAS	Ⅱ5A0738	Cucumis sativus var. sativus
CG1357	Shi Jia Zhuang Huang Gua	China, Hebei	P1	IVF-CAAS	Ⅱ5A0718	Cucumis sativus var. sativus
CG1358	Di Pa Gua	China, Hebei	P1	IVF-CAAS	Ⅱ5A1040	Cucumis sativus var. sativus
CG1359	Chun Huang Gua	China, Hebei	P1	IVF-CAAS	Ⅱ5A0723	Cucumis sativus var. sativus
CG1360	38 Hao Huang Gua	China, Hebei	P1	IVF-CAAS	Ⅱ5A1085	Cucumis sativus var. sativus
CG1361	Shi Feng13	China, Hebei	P1	IVF-CAAS	Ⅱ5A1214	Cucumis sativus var. sativus
CG1362	48-2	China, Hebei	P1	IVF-CAAS	Ⅱ5A1215	Cucumis sativus var. sativus
CG1363	Ji Huang Gua Yi Hao	China, Hebei	P1	IVF-CAAS	Ⅱ5A0031	Cucumis sativus var. sativus
CG1364	Ji Huang Gua Er Hao	China, Hebei	P1	IVF-CAAS	Ⅱ5A0032	Cucumis sativus var. sativus
CG1365	Ji Cai Huang Gua San Hao	China, Hebei	P1	IVF-CAAS	Ⅱ5A0033	Cucumis sativus var. sativus
CG1366	Chong Qing Dan Xuan	China, Hebei	P1	IVF-CAAS	Ⅱ5A0748	Cucumis sativus var. sativus
CG1367	151B Dan Xuan	China, Hebei	P1	IVF-CAAS	Ⅱ5A0749	Cucumis sativus var. sativus
CG1368	84-24	China, Hebei	P1	IVF-CAAS	Ⅱ5A0855	Cucumis sativus var. sativus
CG1369	Zao Chun Gua	China, Hebei	P1	IVF-CAAS	Ⅱ5A0744	Cucumis sativus var. sativus
CG1370	Ben Di Da Ci	China, Hebei	P1	IVF-CAAS	Ⅱ5A0761	Cucumis sativus var. sativus
CG1371	Da Bai Ci	China, Hebei	P1	IVF-CAAS	Ⅱ5A0731	Cucumis sativus var. sativus
CG1372	You Tiao Xiao Qing Ci	China, Hebei	P1	IVF-CAAS	Ⅱ5A0752	Cucumis sativus var. sativus
CG1373	Ye San Bai	China, Hebei	P1	IVF-CAAS	Ⅱ5A0108	Cucumis sativus var. sativus
CG1374	Zao Chun Ba Cha	China, Hebei	P1	IVF-CAAS	Ⅱ5A1084	Cucumis sativus var. sativus
CG1375	Bai Ci Han Ba Cha	China, Hebei	P1	IVF-CAAS	Ⅱ5A1212	Cucumis sativus var. sativus
CG1376	Ye Er San	China, Hebei	P1	IVF-CAAS	Ⅱ5A0106	Cucumis sativus var. sativus
CG1377	Da Huang Gua	China, Hebei	P1	IVF-CAAS	Ⅱ5A0413	Cucumis sativus var. sativus
CG1378	Fu Ping Huang Gua	China, Hebei	P1	IVF-CAAS	Ⅱ5A0730	Cucumis sativus var. sativus
CG1379	Sheng Fang Huang Gua	China, Hebei	P1	IVF-CAAS	Ⅱ5A0442	Cucumis sativus var. sativus
CG1380	You Tiao	China, Hebei	P1	IVF-CAAS	Ⅱ5A0737	Cucumis sativus var. sativus
CG1381	Da You Tiao	China, Hebei	P1	IVF-CAAS	Ⅱ5A0725	Cucumis sativus var. sativus
CG1382	Chang Bai Huang Gua	China, Hebei	P1	IVF-CAAS	Ⅱ5A0734	Cucumis sativus var. sativus
CG1383	Duan Bai Huang Gua	China, Hebei	P1	IVF-CAAS	Ⅱ5A0735	Cucumis sativus var. sativus
CG1384	Ben Di Huang Gua	China, Hebei	P1	IVF-CAAS	Ⅱ5A0740	Cucumis sativus var. sativus
CG1385	Han Huang Gua	China, Hebei	P1	IVF-CAAS	Ⅱ5A0743	Cucumis sativus var. sativus
CG1386	An Zhang Chun Gua	China, Hebei	P1	IVF-CAAS	Ⅱ5A1088	Cucumis sativus var. sativus
CG1387	Wan Huang Gua	China, Henan	P1	IVF-CAAS	Ⅱ5A1121	Cucumis sativus var. sativus
CG1388	Duan Huang Gua	China, Henan	P1	IVF-CAAS	Ⅱ5A1122	Cucumis sativus var. sativus
CG1389	Zhen Ping Huang Gua	China, Henan	P1	IVF-CAAS	Ⅱ5A1131	Cucumis sativus var. sativus
CG1390	Qing Huang Gua	China, Henan	P1	IVF-CAAS	Ⅱ5A1256	Cucumis sativus var. sativus
CG1391	He Nan Zi Jiao	China, Henan	P1	IVF-CAAS	Ⅱ5A0668	Cucumis sativus var. sativus
CG1392	Ji Xian Wu Ming	China, Henan	P1	IVF-CAAS	Ⅱ5A0890	Cucumis sativus var. sativus
CG1393	Xin Ye Huang Gua	China, Henan	P1	IVF-CAAS	Ⅱ5A0892	Cucumis sativus var. sativus
CG1394	Qiu Huang Gua	China, Henan	P1	IVF-CAAS	Ⅱ5A0922	Cucumis sativus var. sativus
CG1395	Tong Liao Xian Gua	China, Henan	P1	IVF-CAAS	Ⅱ5A0943	Cucumis sativus var. sativus
CG1396	Huang Pi San Zhan	China, Henan	P1	IVF-CAAS	Ⅱ5A0959	Cucumis sativus var. sativus
CG1397	Da Cha Xia Gua	China, Henan	P1	IVF-CAAS	Ⅱ5A0970	Cucumis sativus var. sativus
CG1398	Zheng Zhou Hei You Tiao	China, Henan	P1	IVF-CAAS	Ⅱ5A0985	Cucumis sativus var. sativus
CG1399	Ning Ling Huang Gua	China, Henan	P1	IVF-CAAS	Ⅱ5A0987	Cucumis sativus var. sativus
CG1400	Shang Cai Huang Gua	China, Henan	P1	IVF-CAAS	Ⅱ5A0623	Cucumis sativus var. sativus
CG1401	Lin Ru Di Huang Gua	China, Henan	P1	IVF-CAAS	Ⅱ5A0628	Cucumis sativus var. sativus
CG1402	Yan Shi Qiu Di Huang Gua	China, Henan	P1	IVF-CAAS	Ⅱ5A1199	Cucumis sativus var. sativus
CG1403	Xia Feng Yi Hao	China, Henan	P1	IVF-CAAS	Ⅱ5A0088	Cucumis sativus var. sativus
CG1404	Nan Le Shou Qu	China, Henan	P1	IVF-CAAS	Ⅱ5A0432	Cucumis sativus var. sativus
CG1405	Si Zhuang Huang Gua	China, Henan	P1	IVF-CAAS	Ⅱ5A0462	Cucumis sativus var. sativus
CG1406	Nan Zhao Qiu Di Huang Gua	China, Henan	P1	IVF-CAAS	Ⅱ5A1206	Cucumis sativus var. sativus
CG1407	Nan Yang Huang Huang Gua	China, Henan	P1	IVF-CAAS	Ⅱ5A0086	Cucumis sativus var. sativus
CG1408	Tang He Huang Huang Gua	China, Henan	P1	IVF-CAAS	Ⅱ5A0087	Cucumis sativus var. sativus
CG1409	Shang Qiu Qiu Huang Gua	China, Henan	P1	IVF-CAAS	Ⅱ5A0080	Cucumis sativus var. sativus
CG1410	Shang Qiu Xiang Pi Huang Gua	China, Henan	P1	IVF-CAAS	Ⅱ5A0081	Cucumis sativus var. sativus
CG1411	Shang Shui Bai Huang Gua	China, Henan	P1	IVF-CAAS	Ⅱ5A0084	Cucumis sativus var. sativus
CG1412	Tai Kang Xian Huang Gua	China, Henan	P1	IVF-CAAS	Ⅱ5A0082	Cucumis sativus var. sativus
CG1413	An Yang Ci Huang Gua	China, Henan	P1	IVF-CAAS	Ⅱ5A0070	Cucumis sativus var. sativus
CG1414	An Yang Ben Gua	China, Henan	P1	IVF-CAAS	Ⅱ5A0071	Cucumis sativus var. sativus
CG1415	8113	China, Henan	P1	IVF-CAAS	Ⅱ5A0483	Cucumis sativus var. sativus
CG1416	Wei Shi Ye We San	China, Henan	P1	IVF-CAAS	Ⅱ5A0627	Cucumis sativus var. sativus
CG1417	Song Xian Di Huang Gua	China, Henan	P1	IVF-CAAS	Ⅱ5A1200	Cucumis sativus var. sativus
CG1418	Gong Xian Qiu Di Huang Gua	China, Henan	P1	IVF-CAAS	Ⅱ5A1201	Cucumis sativus var. sativus
CG1419	Gong Xian Qiu Di Huang Gua	China, Henan	P1	IVF-CAAS	Ⅱ5A0078	Cucumis sativus var. sativus
CG1420	Kai Feng Ba Da Cha Huang Gua	China, Henan	P1	IVF-CAAS	Ⅱ5A0481	Cucumis sativus var. sativus
CG1421	Kai Feng Qiu Huang Gua	China, Henan	P1	IVF-CAAS	Ⅱ5A0482	Cucumis sativus var. sativus
CG1422	Xin Cai Xian Huang Gua	China, Henan	P1	IVF-CAAS	Ⅱ5A0620	Cucumis sativus var. sativus
CG1423	Qi Xian Qiu Di Huang Gua	China, Henan	P1	IVF-CAAS	Ⅱ5A0079	Cucumis sativus var. sativus
CG1424	Ru Yang Bai Huang Gua	China, Henan	P1	IVF-CAAS	Ⅱ5A0076	Cucumis sativus var. sativus
CG1425	Ji Xian Huang Gua	China, Henan	P1	IVF-CAAS	Ⅱ5A0074	Cucumis sativus var. sativus
CG1426	Shen Qiu Xian Huang Gua	China, Henan	P1	IVF-CAAS	Ⅱ5A0622	Cucumis sativus var. sativus
CG1427	Bi Yang Yang Ye Xian Huang Gua	China, Henan	P1	IVF-CAAS	Ⅱ5A0417	Cucumis sativus var. sativus
CG1428	Luo Ning Di Huang Gua	China, Henan	P1	IVF-CAAS	Ⅱ5A1202	Cucumis sativus var. sativus
CG1429	Xin Zheng Di Huang Gua	China, Henan	P1	IVF-CAAS	Ⅱ5A1052	Cucumis sativus var. sativus
CG1430	Zhe Chuan Huang Gua	China, Henan	P1	IVF-CAAS	Ⅱ5A0630	Cucumis sativus var. sativus
CG1431	Chen Zhou You Bang Zi	China, Henan	P1	IVF-CAAS	Ⅱ5A0621	Cucumis sativus var. sativus
CG1432	Huai Yang Xian Huang Gua	China, Henan	P1	IVF-CAAS	Ⅱ5A0625	Cucumis sativus var. sativus
CG1433	Qing Cha Huang Gua	China, Henan	P1	IVF-CAAS	Ⅱ5A0072	Cucumis sativus var. sativus
CG1434	Luo He Jin Bang Chui	China, Henan	P1	IVF-CAAS	Ⅱ5A1327	Cucumis sativus var. sativus
CG1435	Pu Yang Xian Huang Gua	China, Henan	P1	IVF-CAAS	Ⅱ5A0073	Cucumis sativus var. sativus
CG1436	Ling Bao Di Huang Gua	China, Henan	P1	IVF-CAAS	Ⅱ5A0629	Cucumis sativus var. sativus
CG1437	Jiu Di Pa	China, Henan	P1	IVF-CAAS	Ⅱ5A0465	Cucumis sativus var. sativus
CG1438	She Qi Di Huang Gua	China, Henan	P1	IVF-CAAS	Ⅱ5A1204	Cucumis sativus var. sativus
CG1439	Tai Shan Miao Huang Gua	China, Henan	P1	IVF-CAAS	Ⅱ5A0075	Cucumis sativus var. sativus
CG1440	Xi Hua Hei You Pi	China, Henan	P1	IVF-CAAS	Ⅱ5A0626	Cucumis sativus var. sativus
CG1441	Ba Da Tou Huang Gua	China, Henan	P1	IVF-CAAS	Ⅱ5A0624	Cucumis sativus var. sativus
CG1442	Deng Xian Di Huang Gua	China, Henan	P1	IVF-CAAS	Ⅱ5A1203	Cucumis sativus var. sativus
CG1443	Jia Xian Qiu Di Huang Gua	China, Henan	P1	IVF-CAAS	Ⅱ5A1198	Cucumis sativus var. sativus
CG1444	Zheng Zhou Hei You Tiao	China, Henan	P1	IVF-CAAS	Ⅱ5A0077	Cucumis sativus var. sativus
CG1445	Zheng Zhou Hei You Tiao	China, Henan	P1	IVF-CAAS	Ⅱ5A1057	Cucumis sativus var. sativus
CG1446	Zhen Ping Di Huang Gua	China, Henan	P1	IVF-CAAS	Ⅱ5A1205	Cucumis sativus var. sativus
CG1447	Xiang Cheng Qing Huang Gua	China, Henan	P1	IVF-CAAS	Ⅱ5A0085	Cucumis sativus var. sativus
CG1448	Lu Yi Xian Huang Gua	China, Henan	P1	IVF-CAAS	Ⅱ5A0083	Cucumis sativus var. sativus
CG1449	Hei Xiao Ci Gua	China, Henan	P1	IVF-CAAS	Ⅱ5A0699	Cucumis sativus var. sativus
CG1450	Ci Xing Huang Gua	China, Gansu	P1	IVF-CAAS	Ⅱ5A0686	Cucumis sativus var. sativus
CG1451	Tian Shui Di Huang Bai	China, Gansu	P1	IVF-CAAS	Ⅱ5A0897	Cucumis sativus var. sativus
CG1452	An Ning Ci Gua	China, Lanzhou	P1	IVF-CAAS	Ⅱ5A0246	Cucumis sativus var. sativus
CG1453	Lan Zhou Ci Huang Gua	China, Lanzhou	P1	IVF-CAAS	Ⅱ5A0632	Cucumis sativus var. sativus
CG1454	He Shui Han Huang Gua	China, Gansu	P1	IVF-CAAS	Ⅱ5A1188	Cucumis sativus var. sativus
CG1455	Hei You Tiao Huang Gua	China, Gansu	P1	IVF-CAAS	Ⅱ5A1190	Cucumis sativus var. sativus
CG1456	Qi Huang Gua	China, Gansu	P1	IVF-CAAS	Ⅱ5A0631	Cucumis sativus var. sativus
CG1457	Ning Xian Lv Pi Huang Gua	China, Gansu	P1	IVF-CAAS	Ⅱ5A1189	Cucumis sativus var. sativus
CG1458	Ning Xian Huang Pi Huang Gua	China, Gansu	P1	IVF-CAAS	Ⅱ5A1192	Cucumis sativus var. sativus
CG1459	Bai Huang Gua	China, Gansu	P1	IVF-CAAS	Ⅱ5A0850	Cucumis sativus var. sativus
CG1460	Chang Chun Mi Ci Huang Gua	China, Gansu	P1	IVF-CAAS	Ⅱ5A1098	Cucumis sativus var. sativus
CG1461	Jin Bang Zi Huang Gua	China, Gansu	P1	IVF-CAAS	Ⅱ5A0242	Cucumis sativus var. sativus
CG1462	151 Jia Huang Gua	China, Gansu	P1	IVF-CAAS	Ⅱ5A1191	Cucumis sativus var. sativus
CG1463	Tie Pi Haung Gua	China, Shijiazhuang	P1	IVF-CAAS	Ⅱ5A0657	Cucumis sativus var. sativus
CG1464	Nong Cheng 3 Hao	China, Shanxi	P1	IVF-CAAS	Ⅱ5A0907	Cucumis sativus var. sativus
CG1465	Ci Huang Gua(Bai Ci)	China, Shanxi	P1	IVF-CAAS	Ⅱ5A0876	Cucumis sativus var. sativus
CG1466	Xi An Da Ci(Bai Ci)	China, Shanxi	P1	IVF-CAAS	Ⅱ5A0880	Cucumis sativus var. sativus
CG1467	Jin Zao Sheng	China, Liaoning	P1	IVF-CAAS	Ⅱ5A1010	Cucumis sativus var. sativus
CG1468	Ben Di Huang Gua	China, Liaoning	P1	IVF-CAAS	Ⅱ5A1124	Cucumis sativus var. sativus
CG1469	Han Huang Gua	China, Liaoning	P1	IVF-CAAS	Ⅱ5A1125	Cucumis sativus var. sativus
CG1470	Han Huang Gua	China, Liaoning	P1	IVF-CAAS	Ⅱ5A1126	Cucumis sativus var. sativus
CG1471	Han Di Huang Gua	China, Liaoning	P1	IVF-CAAS	Ⅱ5A1249	Cucumis sativus var. sativus
CG1472	Da Huang Gua	China, Liaoning	P1	IVF-CAAS	Ⅱ5A1250	Cucumis sativus var. sativus
CG1473	Huang Gua	China, Liaoning	P1	IVF-CAAS	Ⅱ5A1251	Cucumis sativus var. sativus
CG1474	Qiu Huang Gua	China, Liaoning	P1	IVF-CAAS	Ⅱ5A1252	Cucumis sativus var. sativus
CG1475	Ben Di Huang Gua	China, Liaoning	P1	IVF-CAAS	Ⅱ5A1391	Cucumis sativus var. sativus
CG1476	Huang Gua	China, Liaoning	P1	IVF-CAAS	Ⅱ5A1392	Cucumis sativus var. sativus
CG1477	Huang Gua	China, Liaoning	P1	IVF-CAAS	Ⅱ5A1393	Cucumis sativus var. sativus
CG1478	Jin Zao Sheng	China, Liaoning	P1	IVF-CAAS	Ⅱ5A0639	Cucumis sativus var. sativus
CG1479	Guan Xian Qiu Gua	China, Liaoning	P1	IVF-CAAS	Ⅱ5A0925	Cucumis sativus var. sativus
CG1480	Yi Tiao Long Huang Gua	China, Liaoning	P1	IVF-CAAS	Ⅱ5A0938	Cucumis sativus var. sativus
CG1481	Gong Zhu Ling Huang Gua	China, Liaoning	P1	IVF-CAAS	Ⅱ5A0947	Cucumis sativus var. sativus
CG1482	Jian Ping Ye San	China, Liaoning	P1	IVF-CAAS	Ⅱ5A0950	Cucumis sativus var. sativus
CG1483	Liao Yang Shui Gua	China, Liaoning	P1	IVF-CAAS	Ⅱ5A0965	Cucumis sativus var. sativus
CG1484	Huo Huang Gua	China, Liaoning	P1	IVF-CAAS	Ⅱ5A1436	Cucumis sativus var. sativus
CG1485	Dan Dong Da Ci	China, Liaoning	P1	IVF-CAAS	Ⅱ5A0409	Cucumis sativus var. sativus
CG1486	Bang Huang Gua	China, Liaoning	P1	IVF-CAAS	Ⅱ5A0833	Cucumis sativus var. sativus
CG1487	Shui Huang Gua	China, Liaoning	P1	IVF-CAAS	Ⅱ5A0834	Cucumis sativus var. sativus
CG1488	Hei Han Tui	China, Liaoning	P1	IVF-CAAS	Ⅱ5A0841	Cucumis sativus var. sativus
CG1489	Hei Han Tui	China, Liaoning	P1	IVF-CAAS	Ⅱ5A1076	Cucumis sativus var. sativus
CG1490	Qing Pi Qiu Huang Gua	China, Liaoning	P1	IVF-CAAS	Ⅱ5A0581	Cucumis sativus var. sativus
CG1491	Qiu Huang Gua	China, Liaoning	P1	IVF-CAAS	Ⅱ5A0832	Cucumis sativus var. sativus
CG1492	Lu Di Yi Hao	China, Liaoning	P1	IVF-CAAS	Ⅱ5A0257	Cucumis sativus var. sativus
CG1493	C150-13	China, Liaoning	P1	IVF-CAAS	Ⅱ5A0593	Cucumis sativus var. sativus
CG1494	Han Huang Gua	China, Liaoning	P1	IVF-CAAS	Ⅱ5A1435	Cucumis sativus var. sativus
CG1495	Qiu Huang Gua	China, Liaoning	P1	IVF-CAAS	Ⅱ5A0580	Cucumis sativus var. sativus
CG1496	Lang Ya Bang	China, Liaoning	P1	IVF-CAAS	Ⅱ5A0843	Cucumis sativus var. sativus
CG1497	Bai Haung Gua(Jiu Lian Deng)	China, Liaoning	P1	IVF-CAAS	Ⅱ5A0837	Cucumis sativus var. sativus
CG1498	Da Lian Zao Huang Gua	China, Liaoning	P1	IVF-CAAS	Ⅱ5A1187	Cucumis sativus var. sativus
CG1499	Tang Shan Qiu Gua	China, Liaoning	P1	IVF-CAAS	Ⅱ5A1427	Cucumis sativus var. sativus
CG1500	Lv Shun Ben Di	China, Liaoning	P1	IVF-CAAS	Ⅱ5A0452	Cucumis sativus var. sativus
CG1501	Di Huang Gua	China, Liaoning	P1	IVF-CAAS	Ⅱ5A0578	Cucumis sativus var. sativus
CG1502	Qing Pi Di Huang Gua	China, Liaoning	P1	IVF-CAAS	Ⅱ5A0611	Cucumis sativus var. sativus
CG1503	Huo Huang Gua	China, Liaoning	P1	IVF-CAAS	Ⅱ5A1080	Cucumis sativus var. sativus
CG1504	Zhu Ye Qing	China, Liaoning	P1	IVF-CAAS	Ⅱ5A0583	Cucumis sativus var. sativus
CG1505	Han Ye San	China, Liaoning	P1	IVF-CAAS	Ⅱ5A0840	Cucumis sativus var. sativus
CG1506	Jian Ping Xian Qiu Huang Gua	China, Liaoning	P1	IVF-CAAS	Ⅱ5A1049	Cucumis sativus var. sativus
CG1507	Ning Yang Ci Gua	China, Liaoning	P1	IVF-CAAS	Ⅱ5A0592	Cucumis sativus var. sativus
CG1508	Zao Han Huang Gua	China, Liaoning	P1	IVF-CAAS	Ⅱ5A1079	Cucumis sativus var. sativus
CG1509	Zao Han Huang Gua(Xuan)	China, Liaoning	P1	IVF-CAAS	Ⅱ5A1301	Cucumis sativus var. sativus
CG1510	Di Huang Gua	China, Liaoning	P1	IVF-CAAS	Ⅱ5A0577	Cucumis sativus var. sativus
CG1511	Da Ba Cha	China, Liaoning	P1	IVF-CAAS	Ⅱ5A0579	Cucumis sativus var. sativus
CG1512	Fu Shun Qiu Huang Gua	China, Liaoning	P1	IVF-CAAS	Ⅱ5A0582	Cucumis sativus var. sativus
CG1513	Da Jia Huang Gua	China, Liaoning	P1	IVF-CAAS	Ⅱ5A0839	Cucumis sativus var. sativus
CG1514	Xin Bin Ye San(Xuan)	China, Liaoning	P1	IVF-CAAS	Ⅱ5A1302	Cucumis sativus var. sativus
CG1515	Ba Cha	China, Liaoning	P1	IVF-CAAS	Ⅱ5A0836	Cucumis sativus var. sativus
CG1516	Bai Han Huang Gua	China, Liaoning	P1	IVF-CAAS	Ⅱ5A1406	Cucumis sativus var. sativus
CG1517	Han Huang Gua	China, Liaoning	P1	IVF-CAAS	Ⅱ5A1434	Cucumis sativus var. sativus
CG1518	Bai Huang Gua	China, Liaoning	P1	IVF-CAAS	Ⅱ5A1183	Cucumis sativus var. sativus
CG1519	Shen Yang Ye San	China, Liaoning	P1	IVF-CAAS	Ⅱ5A1185	Cucumis sativus var. sativus
CG1520	Qiu Huang Gua	China, Liaoning	P1	IVF-CAAS	Ⅱ5A1303	Cucumis sativus var. sativus
CG1521	Lu Di 2 Hao	China, Liaoning	P1	IVF-CAAS	Ⅱ5A1305	Cucumis sativus var. sativus
CG1522	Lu Di 2 Hao ♀	China, Liaoning	P1	IVF-CAAS	Ⅱ5A1306	Cucumis sativus var. sativus
CG1523	Lu Di 2 Hao ♂	China, Liaoning	P1	IVF-CAAS	Ⅱ5A1307	Cucumis sativus var. sativus
CG1524	Bai Huang Gua	China, Liaoning	P1	IVF-CAAS	Ⅱ5A1308	Cucumis sativus var. sativus
CG1525	Jin Si Xuan	China, Liaoning	P1	IVF-CAAS	Ⅱ5A1409	Cucumis sativus var. sativus
CG1526	Xiao Jin Beng Huang Gua	China, Liaoning	P1	IVF-CAAS	Ⅱ5A1433	Cucumis sativus var. sativus
CG1527	Han Huang Gua(Wan Shu)	China, Liaoning	P1	IVF-CAAS	Ⅱ5A1489	Cucumis sativus var. sativus
CG1528	Da Ba Cha	China, Liaoning	P1	IVF-CAAS	Ⅱ5A0589	Cucumis sativus var. sativus
CG1529	Zhong Xiao Zhen Huang Gua	China, Liaoning	P1	IVF-CAAS	Ⅱ5A1056	Cucumis sativus var. sativus
CG1530	Cao Huang Gua	China, Liaoning	P1	IVF-CAAS	Ⅱ5A1046	Cucumis sativus var. sativus
CG1531	Qing Jiang Xian Gua	China, Liaoning	P1	IVF-CAAS	Ⅱ5A1047	Cucumis sativus var. sativus
CG1532	Hai Cheng Ye San	China, Liaoning	P1	IVF-CAAS	Ⅱ5A1408	Cucumis sativus var. sativus
CG1533	Yi Zhang Qing	China, Liaoning	P1	IVF-CAAS	Ⅱ5A0586	Cucumis sativus var. sativus
CG1534	Yan Bo Qing	China, Liaoning	P1	IVF-CAAS	Ⅱ5A0590	Cucumis sativus var. sativus
CG1535	Xia Feng Yi Hao	China, Liaoning	P1	IVF-CAAS	Ⅱ5A0227	Cucumis sativus var. sativus
CG1536	Lv Wang Huang Gua	China, Liaoning	P1	IVF-CAAS	Ⅱ5A1484	Cucumis sativus var. sativus
CG1537	Liao Yang Du Tiao	China, Liaoning	P1	IVF-CAAS	Ⅱ5A0584	Cucumis sativus var. sativus
CG1538	Qiu Huang Gua	China, Liaoning	P1	IVF-CAAS	Ⅱ5A1407	Cucumis sativus var. sativus
CG1539	Yi Chuan Ling	China, Liaoning	P1	IVF-CAAS	Ⅱ5A1410	Cucumis sativus var. sativus
CG1540	Hei Ba Ci	China, Liaoning	P1	IVF-CAAS	Ⅱ5A0612	Cucumis sativus var. sativus
CG1541	Liao Yang Ye San	China, Liaoning	P1	IVF-CAAS	Ⅱ5A0614	Cucumis sativus var. sativus
CG1542	Jin Zao Sheng	China, Liaoning	P1	IVF-CAAS	Ⅱ5A1184	Cucumis sativus var. sativus
CG1543	Han Huang Gua	China, Liaoning	P1	IVF-CAAS	Ⅱ5A0587	Cucumis sativus var. sativus
CG1544	Han Huang Gua	China, Liaoning	P1	IVF-CAAS	Ⅱ5A1077	Cucumis sativus var. sativus
CG1545	Han Huang Gua	China, Liaoning	P1	IVF-CAAS	Ⅱ5A1078	Cucumis sativus var. sativus
CG1546	Chun Dao Qiu	China, Liaoning	P1	IVF-CAAS	Ⅱ5A0585	Cucumis sativus var. sativus
CG1547	Bei Jing Qing	China, Liaoning	P1	IVF-CAAS	Ⅱ5A0613	Cucumis sativus var. sativus
CG1548	Han Huang Gua	China, Liaoning	P1	IVF-CAAS	Ⅱ5A0835	Cucumis sativus var. sativus
CG1549	Jin Zhou Xiao Huang Gua	China, Liaoning	P1	IVF-CAAS	Ⅱ5A1081	Cucumis sativus var. sativus
CG1550	Jin Zhou Shui Huang Gua(Xuan)	China, Liaoning	P1	IVF-CAAS	Ⅱ5A1304	Cucumis sativus var. sativus
CG1551	Yang Huang Gua	China, Liaoning	P1	IVF-CAAS	Ⅱ5A0588	Cucumis sativus var. sativus
CG1552	Jin Zhou Ye San	China, Liaoning	P1	IVF-CAAS	Ⅱ5A0838	Cucumis sativus var. sativus
CG1553	Hei Han Tui	China, Liaoning	P1	IVF-CAAS	Ⅱ5A0831	Cucumis sativus var. sativus
CG1554	Han Huang Gua	China, Liaoning	P1	IVF-CAAS	Ⅱ5A0842	Cucumis sativus var. sativus
CG1555	828	China, Henan	P1	IVF-CAAS	Ⅱ5A0689	Cucumis sativus var. sativus
CG1556	Chang Chun Mi Ci	China, Changchun	P1	IVF-CAAS	Ⅱ5A0708	Cucumis sativus var. sativus
CG1557	San Ye Di Huang Gua	China, Shanxi	P1	IVF-CAAS	Ⅱ5A0990	Cucumis sativus var. sativus
CG1558	Shan Nan Shan Huang Gua	China, Shanxi	P1	IVF-CAAS	Ⅱ5A1082	Cucumis sativus var. sativus
CG1559	Xi Xiang Shan Huang Gua(Qing)	China, Shanxi	P1	IVF-CAAS	Ⅱ5A0202	Cucumis sativus var. sativus
CG1560	Xi Xiang Shan Huang Gua(Bai)	China, Shanxi	P1	IVF-CAAS	Ⅱ5A0203	Cucumis sativus var. sativus
CG1561	Xi Nong 58 Hao Huang Gua	China, Shanxi	P1	IVF-CAAS	Ⅱ5A0024	Cucumis sativus var. sativus
CG1562	Han Huang Gua	China, Qinghai	P1	IVF-CAAS	Ⅱ5A0871	Cucumis sativus var. sativus
CG1563	Xin Nong Yi Hao	China, Qinghai	P1	IVF-CAAS	Ⅱ5A0905	Cucumis sativus var. sativus
CG1564	4 Hao Huang Gua	China, Qinghai	P1	IVF-CAAS	Ⅱ5A0709	Cucumis sativus var. sativus
CG1565	Han Huang Gua	China, Qinghai	P1	IVF-CAAS	Ⅱ5A0993	Cucumis sativus var. sativus
CG1566	Du Tiao Huang Gua	China, Liaoning	P1	IVF-CAAS	Ⅱ5A0646	Cucumis sativus var. sativus
CG1567	Hei Ba Ci Gua	China, Liaoning	P1	IVF-CAAS	Ⅱ5A0660	Cucumis sativus var. sativus
CG1568	Nong Cheng 2 Hao	China, Shanxi	P1	IVF-CAAS	Ⅱ5A0679	Cucumis sativus var. sativus
CG1569	Zao Huang Gua	China, Heilongjiang	P1	IVF-CAAS	Ⅱ5A1136	Cucumis sativus var. sativus
CG1570	Hei Long	China, Heilongjiang	P1	IVF-CAAS	Ⅱ5A0690	Cucumis sativus var. sativus
CG1571	Ye San Han Huang Gua	China, Heilongjiang	P1	IVF-CAAS	Ⅱ5A0920	Cucumis sativus var. sativus
CG1572	Leng Xuan Yi Hao	China, Heilongjiang	P1	IVF-CAAS	Ⅱ5A0952	Cucumis sativus var. sativus
CG1573	You Hao Qing Ci	China, Heilongjiang	P1	IVF-CAAS	Ⅱ5A0254	Cucumis sativus var. sativus
CG1574	Bei An Huang Gua	China, Heilongjiang	P1	IVF-CAAS	Ⅱ5A1416	Cucumis sativus var. sativus
CG1575	Da Shui Huang Gua	China, Harbin	P1	IVF-CAAS	Ⅱ5A1101	Cucumis sativus var. sativus
CG1576	Qing Ci Huang Gua	China, Harbin	P1	IVF-CAAS	Ⅱ5A1102	Cucumis sativus var. sativus
CG1577	Shui Hang Gua	China, Harbin	P1	IVF-CAAS	Ⅱ5A1105	Cucumis sativus var. sativus
CG1578	Tang Shan Qiu Gua	China, Harbin	P1	IVF-CAAS	Ⅱ5A1476	Cucumis sativus var. sativus
CG1579	He Han	China, Harbin	P1	IVF-CAAS	Ⅱ5A0229	Cucumis sativus var. sativus
CG1580	Chang Chun Mi Ci	China, Harbin	P1	IVF-CAAS	Ⅱ5A0025	Cucumis sativus var. sativus
CG1581	Ye San Han Huang Gua	China, Harbin	P1	IVF-CAAS	Ⅱ5A0026	Cucumis sativus var. sativus
CG1582	Ba Cha Han Huang Gua	China, Harbin	P1	IVF-CAAS	Ⅱ5A0027	Cucumis sativus var. sativus
CG1583	Min Zhu Ye San	China, Harbin	P1	IVF-CAAS	Ⅱ5A0030	Cucumis sativus var. sativus
CG1584	Xiao Han Huang Gua	China, Harbin	P1	IVF-CAAS	Ⅱ5A0487	Cucumis sativus var. sativus
CG1585	Xin Chun Mi Ci	China, Harbin	P1	IVF-CAAS	Ⅱ5A0995	Cucumis sativus var. sativus
CG1586	Shang Hai Huang Gua	China, Heilongjiang	P1	IVF-CAAS	Ⅱ5A0228	Cucumis sativus var. sativus
CG1587	Gao Chan Huang Gua	China, Heilongjiang	P1	IVF-CAAS	Ⅱ5A1103	Cucumis sativus var. sativus
CG1588	Zao Huang Gua	China, Heilongjiang	P1	IVF-CAAS	Ⅱ5A1104	Cucumis sativus var. sativus
CG1589	Da Qing Pi	China, Heilongjiang	P1	IVF-CAAS	Ⅱ5A0994	Cucumis sativus var. sativus
CG1590	Mu Xu Yuan Ci Gua	China, Heilongjiang	P1	IVF-CAAS	Ⅱ5A0233	Cucumis sativus var. sativus
CG1591	Xiao Xiang Huang Gua	China, Heilongjiang	P1	IVF-CAAS	Ⅱ5A0230	Cucumis sativus var. sativus
CG1592	Jin Yan Yi Hao	China, Heilongjiang	P1	IVF-CAAS	Ⅱ5A0232	Cucumis sativus var. sativus
CG1593	Chao Xian Huang Gua	China, Heilongjiang	P1	IVF-CAAS	Ⅱ5A1418	Cucumis sativus var. sativus
CG1594	Han Huang Gua	China, Heilongjiang	P1	IVF-CAAS	Ⅱ5A1415	Cucumis sativus var. sativus
CG1595	Lao Lai Shao	China, Heilongjiang	P1	IVF-CAAS	Ⅱ5A0231	Cucumis sativus var. sativus
CG1596	Wen Shang Huang Gua	China, Heilongjiang	P1	IVF-CAAS	Ⅱ5A0424	Cucumis sativus var. sativus
CG1597	Chinesische Schlangen	China	P1	CGN	CGN19592	Cucumis sativus var. sativus
CG1598	G1117	NA	P1	IVF-CAAS	G1117	Cucumis sativus var. sativus
CG1599	G1118	NA	P1	IVF-CAAS	G1118	Cucumis sativus var. sativus
CG1600	G1119	NA	P1	IVF-CAAS	G1119	Cucumis sativus var. sativus
CG1601	Xin Tai Mi Ci	NA	P1	IVF-CAAS	G1135	Cucumis sativus var. sativus
CG1602	228	NA	P1	IVF-CAAS	G1203	Cucumis sativus var. sativus
CG1603	G1204	NA	P1	IVF-CAAS	G1204	Cucumis sativus var. sativus
CG1604	G1206	NA	P1	IVF-CAAS	G1206	Cucumis sativus var. sativus
CG1605	G1208	NA	P1	IVF-CAAS	G1208	Cucumis sativus var. sativus
CG1606	G1210	NA	P1	IVF-CAAS	G1210	Cucumis sativus var. sativus
CG1607	G213	NA	P1	IVF-CAAS	G213	Cucumis sativus var. sativus
CG1608	G219	NA	P1	IVF-CAAS	G219	Cucumis sativus var. sativus
CG1609	G222	NA	P1	IVF-CAAS	G222	Cucumis sativus var. sativus
CG1610	G310	NA	P1	IVF-CAAS	G310	Cucumis sativus var. sativus
CG1611	GC1	NA	P1	IVF-CAAS	GC1	Cucumis sativus var. sativus
CG1612	GC2	NA	P1	IVF-CAAS	GC2	Cucumis sativus var. sativus
CG1613	GC3	NA	P1	IVF-CAAS	GC3	Cucumis sativus var. sativus
CG1614	GC5	NA	P1	IVF-CAAS	GC5	Cucumis sativus var. sativus
CG1615	GC64	NA	P1	IVF-CAAS	GC64	Cucumis sativus var. sativus
CG1616	GC65	NA	P1	IVF-CAAS	GC65	Cucumis sativus var. sativus
CG1617	GC66	NA	P1	IVF-CAAS	GC66	Cucumis sativus var. sativus
CG1618	GC67	NA	P1	IVF-CAAS	GC67	Cucumis sativus var. sativus
CG1619	GC68	NA	P1	IVF-CAAS	GC68	Cucumis sativus var. sativus
CG1620	GC69	NA	P1	IVF-CAAS	GC69	Cucumis sativus var. sativus
CG1621	GP1	NA	P1	IVF-CAAS	GP1	Cucumis sativus var. sativus
CG1622	GP3	NA	P1	IVF-CAAS	GP3	Cucumis sativus var. sativus
CG1623	GP30	NA	P1	IVF-CAAS	GP30	Cucumis sativus var. sativus
CG1624	GP9	NA	P1	IVF-CAAS	GP9	Cucumis sativus var. sativus
CG1625	GW1	NA	P1	IVF-CAAS	GW1	Cucumis sativus var. sativus
CG1626	GW11	NA	P1	IVF-CAAS	GW11	Cucumis sativus var. sativus
CG1627	GW13-2	NA	P1	IVF-CAAS	GW13-2	Cucumis sativus var. sativus
CG1628	GW51	NA	P1	IVF-CAAS	GW51	Cucumis sativus var. sativus
CG1629	GW7	NA	P1	IVF-CAAS	GW7	Cucumis sativus var. sativus
CG1630	GW9	NA	P1	IVF-CAAS	GW9	Cucumis sativus var. sativus
CG1631	Yang Xing Huang Gua	China, Shanghai	P1	IVF-CAAS	Ⅱ5A1005	Cucumis sativus var. sativus
CG1632	Shu Pu Huang Gua	China, Shanghai	P1	IVF-CAAS	Ⅱ5A0669	Cucumis sativus var. sativus
CG1633	Shang Hai Yang Xing	China, Shanghai	P1	IVF-CAAS	Ⅱ5A0957	Cucumis sativus var. sativus
CG1634	Shang Hai Huang Gua	China, Shanghai	P1	IVF-CAAS	Ⅱ5A0311	Cucumis sativus var. sativus
CG1635	Hu 13 Hao	China, Shanghai	P1	IVF-CAAS	Ⅱ5A1058	Cucumis sativus var. sativus
CG1636	Hu 5 Hao Huang Gua	China, Shanghai	P1	IVF-CAAS	Ⅱ5A1148	Cucumis sativus var. sativus
CG1637	Kang Bing Yang Xing	China, Shanghai	P1	IVF-CAAS	Ⅱ5A1149	Cucumis sativus var. sativus
CG1638	Yang Xing Huang Gua	China, Shanghai	P1	IVF-CAAS	Ⅱ5A0035	Cucumis sativus var. sativus
CG1639	Teng Xian Huang Gua	China, Shanghai	P1	IVF-CAAS	Ⅱ5A1300	Cucumis sativus var. sativus
CG1640	Shou Guang Di Huang Gua	China, Shandong	P1	IVF-CAAS	Ⅱ5A1009	Cucumis sativus var. sativus
CG1641	Teng Xian Huang Gua	China, Shandong	P1	IVF-CAAS	Ⅱ5A1012	Cucumis sativus var. sativus
CG1642	Jia Huang Gua	China, Shandong	P1	IVF-CAAS	Ⅱ5A1129	Cucumis sativus var. sativus
CG1643	Xian Huang Gua	China, Shandong	P1	IVF-CAAS	Ⅱ5A1130	Cucumis sativus var. sativus
CG1644	Huang Gua	China, Shandong	P1	IVF-CAAS	Ⅱ5A1254	Cucumis sativus var. sativus
CG1645	You Huang Gua	China, Shandong	P1	IVF-CAAS	Ⅱ5A1395	Cucumis sativus var. sativus
CG1646	Shan Dong Ci Gua	China, Shandong	P1	IVF-CAAS	Ⅱ5A0888	Cucumis sativus var. sativus
CG1647	An Yang Ci Gua	China, Shandong	P1	IVF-CAAS	Ⅱ5A0900	Cucumis sativus var. sativus
CG1648	Ning Yan Ci Gua	China, Shandong	P1	IVF-CAAS	Ⅱ5A0901	Cucumis sativus var. sativus
CG1649	Shan Dong Mi Ci	China, Shandong	P1	IVF-CAAS	Ⅱ5A0902	Cucumis sativus var. sativus
CG1650	Tai An Huang Gua	China, Shandong	P1	IVF-CAAS	Ⅱ5A0903	Cucumis sativus var. sativus
CG1651	Jie Tou Huang Gua	China, Shandong	P1	IVF-CAAS	Ⅱ5A0906	Cucumis sativus var. sativus
CG1652	Di Huang Gua	China, Shandong	P1	IVF-CAAS	Ⅱ5A0910	Cucumis sativus var. sativus
CG1653	Heng Jin Huang Gua	China, Shandong	P1	IVF-CAAS	Ⅱ5A0913	Cucumis sativus var. sativus
CG1654	Pan Shi Chun Huang Gua	China, Shandong	P1	IVF-CAAS	Ⅱ5A0914	Cucumis sativus var. sativus
CG1655	Guang Rao Da Ci	China, Shandong	P1	IVF-CAAS	Ⅱ5A0917	Cucumis sativus var. sativus
CG1656	Zhang Qiu Qing Gua	China, Shandong	P1	IVF-CAAS	Ⅱ5A0921	Cucumis sativus var. sativus
CG1657	Ji Ning Chang Gua	China, Shandong	P1	IVF-CAAS	Ⅱ5A0927	Cucumis sativus var. sativus
CG1658	Yang Xin Ci Gua	China, Shandong	P1	IVF-CAAS	Ⅱ5A0930	Cucumis sativus var. sativus
CG1659	Rong Cheng Huang Gua	China, Shandong	P1	IVF-CAAS	Ⅱ5A0936	Cucumis sativus var. sativus
CG1660	Lin Qing Ci Gua	China, Shandong	P1	IVF-CAAS	Ⅱ5A0944	Cucumis sativus var. sativus
CG1661	Ping Yuan Di Huang Gua	China, Shandong	P1	IVF-CAAS	Ⅱ5A0945	Cucumis sativus var. sativus
CG1662	Ji Ning Ye San	China, Shandong	P1	IVF-CAAS	Ⅱ5A0946	Cucumis sativus var. sativus
CG1663	Duan Han Huang Gua	China, Shandong	P1	IVF-CAAS	Ⅱ5A0951	Cucumis sativus var. sativus
CG1664	Zao Chun Huang Gua	China, Shandong	P1	IVF-CAAS	Ⅱ5A0953	Cucumis sativus var. sativus
CG1665	Bo Shan Di Fang Zhong	China, Shandong	P1	IVF-CAAS	Ⅱ5A0954	Cucumis sativus var. sativus
CG1666	Guang Rao Chun Gua	China, Shandong	P1	IVF-CAAS	Ⅱ5A0955	Cucumis sativus var. sativus
CG1667	Teng Xian Huang Gua	China, Shandong	P1	IVF-CAAS	Ⅱ5A0964	Cucumis sativus var. sativus
CG1668	Qing Dao Ye Er San	China, Shandong	P1	IVF-CAAS	Ⅱ5A0977	Cucumis sativus var. sativus
CG1669	Zhu Zhuang Ban Xia	China, Shandong	P1	IVF-CAAS	Ⅱ5A0978	Cucumis sativus var. sativus
CG1670	Da Ba Cha	China, Shandong	P1	IVF-CAAS	Ⅱ5A0326	Cucumis sativus var. sativus
CG1671	Lv Zhuang Xian Gua	China, Shandong	P1	IVF-CAAS	Ⅱ5A0773	Cucumis sativus var. sativus
CG1672	Qiu Huang Gua	China, Shandong	P1	IVF-CAAS	Ⅱ5A0349	Cucumis sativus var. sativus
CG1673	Xiao Mi Ci	China, Shandong	P1	IVF-CAAS	Ⅱ5A0779	Cucumis sativus var. sativus
CG1674	Ci Gua	China, Shandong	P1	IVF-CAAS	Ⅱ5A0338	Cucumis sativus var. sativus
CG1675	Lin Qing Jin Bang Chui	China, Shandong	P1	IVF-CAAS	Ⅱ5A1035	Cucumis sativus var. sativus
CG1676	Bai Huang Gua	China, Shandong	P1	IVF-CAAS	Ⅱ5A0320	Cucumis sativus var. sativus
CG1677	Xian Gua	China, Shandong	P1	IVF-CAAS	Ⅱ5A0807	Cucumis sativus var. sativus
CG1678	Ye Er San	China, Shandong	P1	IVF-CAAS	Ⅱ5A0806	Cucumis sativus var. sativus
CG1679	Ji Ning Chang Ba	China, Shandong	P1	IVF-CAAS	Ⅱ5A1070	Cucumis sativus var. sativus
CG1680	Lu Huang Yi Hao	China, Shandong	P1	IVF-CAAS	Ⅱ5A1068	Cucumis sativus var. sativus
CG1681	Xian Gua	China, Shandong	P1	IVF-CAAS	Ⅱ5A1030	Cucumis sativus var. sativus
CG1682	Guan Xian Di Huang Gua	China, Shandong	P1	IVF-CAAS	Ⅱ5A1031	Cucumis sativus var. sativus
CG1683	Er Qiu	China, Shandong	P1	IVF-CAAS	Ⅱ5A0340	Cucumis sativus var. sativus
CG1684	Huang Gua	China, Shandong	P1	IVF-CAAS	Ⅱ5A0362	Cucumis sativus var. sativus
CG1685	Xian Gua	China, Shandong	P1	IVF-CAAS	Ⅱ5A0328	Cucumis sativus var. sativus
CG1686	Xiao Ba Cha	China, Shandong	P1	IVF-CAAS	Ⅱ5A0355	Cucumis sativus var. sativus
CG1687	Zhu Zhuang Qiu Gua	China, Shandong	P1	IVF-CAAS	Ⅱ5A0421	Cucumis sativus var. sativus
CG1688	Da Ba Cha	China, Shandong	P1	IVF-CAAS	Ⅱ5A0791	Cucumis sativus var. sativus
CG1689	Lu Gun Zhu Di Huang Gua	China, Shandong	P1	IVF-CAAS	Ⅱ5A0351	Cucumis sativus var. sativus
CG1690	Ci Gua	China, Shandong	P1	IVF-CAAS	Ⅱ5A0342	Cucumis sativus var. sativus
CG1691	Ning Yang Da Ci	China, Shandong	P1	IVF-CAAS	Ⅱ5A0448	Cucumis sativus var. sativus
CG1692	Shou Guang Di Huang Gua	China, Shandong	P1	IVF-CAAS	Ⅱ5A1024	Cucumis sativus var. sativus
CG1693	Mai Huang Gua	China, Shandong	P1	IVF-CAAS	Ⅱ5A0431	Cucumis sativus var. sativus
CG1694	Qing Pi Qing	China, Shandong	P1	IVF-CAAS	Ⅱ5A0618	Cucumis sativus var. sativus
CG1695	Xiao Ba Cha	China, Shandong	P1	IVF-CAAS	Ⅱ5A0815	Cucumis sativus var. sativus
CG1696	Ye Er San Huang Gua	China, Shandong	P1	IVF-CAAS	Ⅱ5A0769	Cucumis sativus var. sativus
CG1697	Jia Huang Gua	China, Shandong	P1	IVF-CAAS	Ⅱ5A0337	Cucumis sativus var. sativus
CG1698	Ci Gua	China, Shandong	P1	IVF-CAAS	Ⅱ5A0788	Cucumis sativus var. sativus
CG1699	Di Huang Gua	China, Shandong	P1	IVF-CAAS	Ⅱ5A0801	Cucumis sativus var. sativus
CG1700	Huang Gua	China, Shandong	P1	IVF-CAAS	Ⅱ5A0360	Cucumis sativus var. sativus
CG1701	Da Ba Cha	China, Shandong	P1	IVF-CAAS	Ⅱ5A0361	Cucumis sativus var. sativus
CG1702	Mai Huang Gua	China, Shandong	P1	IVF-CAAS	Ⅱ5A0776	Cucumis sativus var. sativus
CG1703	Di Huang Gua	China, Shandong	P1	IVF-CAAS	Ⅱ5A0777	Cucumis sativus var. sativus
CG1704	Chun Dao Qiu	China, Shandong	P1	IVF-CAAS	Ⅱ5A0813	Cucumis sativus var. sativus
CG1705	Ci Di Huang Gua	China, Shandong	P1	IVF-CAAS	Ⅱ5A0814	Cucumis sativus var. sativus
CG1706	Ye Xian Ban Xia Huang Gua(Qiu)	China, Shandong	P1	IVF-CAAS	Ⅱ5A0218	Cucumis sativus var. sativus
CG1707	Ye Er San	China, Shandong	P1	IVF-CAAS	Ⅱ5A0356	Cucumis sativus var. sativus
CG1708	Di Huang Gua	China, Shandong	P1	IVF-CAAS	Ⅱ5A0808	Cucumis sativus var. sativus
CG1709	Xin Tai Mai Huang Gua(Xin Tai Mi Ci)	China, Shandong	P1	IVF-CAAS	Ⅱ5A0170	Cucumis sativus var. sativus
CG1710	Di Huang Gua	China, Shandong	P1	IVF-CAAS	Ⅱ5A0811	Cucumis sativus var. sativus
CG1711	Qu Fu Ye Er San	China, Shandong	P1	IVF-CAAS	Ⅱ5A1025	Cucumis sativus var. sativus
CG1712	Chun Dao Qiu	China, Shandong	P1	IVF-CAAS	Ⅱ5A0805	Cucumis sativus var. sativus
CG1713	Qiu Huang Gua	China, Shandong	P1	IVF-CAAS	Ⅱ5A0800	Cucumis sativus var. sativus
CG1714	Zao Zhuang Wu Zhao Long	China, Shandong	P1	IVF-CAAS	Ⅱ5A1032	Cucumis sativus var. sativus
CG1715	Xian Gua	China, Shandong	P1	IVF-CAAS	Ⅱ5A0790	Cucumis sativus var. sativus
CG1716	Xi Xia Qiu Huang Gua	China, Shandong	P1	IVF-CAAS	Ⅱ5A0159	Cucumis sativus var. sativus
CG1717	Xian Gua	China, Shandong	P1	IVF-CAAS	Ⅱ5A0767	Cucumis sativus var. sativus
CG1718	Si Ye Huang Gua	China, Shandong	P1	IVF-CAAS	Ⅱ5A0768	Cucumis sativus var. sativus
CG1719	Ci Di Huang Gua	China, Shandong	P1	IVF-CAAS	Ⅱ5A0816	Cucumis sativus var. sativus
CG1720	Liang Shan Fu Huang Gua	China, Shandong	P1	IVF-CAAS	Ⅱ5A1029	Cucumis sativus var. sativus
CG1721	Qiu Huang Gua	China, Shandong	P1	IVF-CAAS	Ⅱ5A0339	Cucumis sativus var. sativus
CG1722	Wen Shang Di Huang Gua	China, Shandong	P1	IVF-CAAS	Ⅱ5A1026	Cucumis sativus var. sativus
CG1723	Liu Tiao Qing Ci Gua	China, Shandong	P1	IVF-CAAS	Ⅱ5A0775	Cucumis sativus var. sativus
CG1724	Yi Yuan Ci Gua	China, Shandong	P1	IVF-CAAS	Ⅱ5A0167	Cucumis sativus var. sativus
CG1725	Di Huang Gua	China, Shandong	P1	IVF-CAAS	Ⅱ5A0789	Cucumis sativus var. sativus
CG1726	Tai An Di Huang Gua	China, Shandong	P1	IVF-CAAS	Ⅱ5A0171	Cucumis sativus var. sativus
CG1727	Qiu Huang Gua	China, Shandong	P1	IVF-CAAS	Ⅱ5A0797	Cucumis sativus var. sativus
CG1728	Jin Si Huang Gua	China, Shandong	P1	IVF-CAAS	Ⅱ5A0973	Cucumis sativus var. sativus
CG1729	Ai Sheng Huang Gua	China, Shandong	P1	IVF-CAAS	Ⅱ5A1238	Cucumis sativus var. sativus
CG1730	Ji Nan Mi Ci	China, Shandong	P1	IVF-CAAS	Ⅱ5A1356	Cucumis sativus var. sativus
CG1731	Ye Er San	China, Shandong	P1	IVF-CAAS	Ⅱ5A0778	Cucumis sativus var. sativus
CG1732	Ji Ning Yu Gua	China, Shandong	P1	IVF-CAAS	Ⅱ5A1036	Cucumis sativus var. sativus
CG1733	Ji Ning Xiao Chang Ba	China, Shandong	P1	IVF-CAAS	Ⅱ5A0166	Cucumis sativus var. sativus
CG1734	Chun Dao Qiu	China, Shandong	P1	IVF-CAAS	Ⅱ5A0329	Cucumis sativus var. sativus
CG1735	74-18	China, Shandong	P1	IVF-CAAS	Ⅱ5A0330	Cucumis sativus var. sativus
CG1736	Qiu Huang Gua	China, Shandong	P1	IVF-CAAS	Ⅱ5A0332	Cucumis sativus var. sativus
CG1737	Chun Huang Gua	China, Shandong	P1	IVF-CAAS	Ⅱ5A0792	Cucumis sativus var. sativus
CG1738	Bai Pi Huang Gua	China, Shandong	P1	IVF-CAAS	Ⅱ5A0764	Cucumis sativus var. sativus
CG1739	Shan Dong Xian Gua	China, Shandong	P1	IVF-CAAS	Ⅱ5A0419	Cucumis sativus var. sativus
CG1740	Bo Shan Xian Gua	China, Shandong	P1	IVF-CAAS	Ⅱ5A1027	Cucumis sativus var. sativus
CG1741	Zhang Dian Chun Dao Qiu	China, Shandong	P1	IVF-CAAS	Ⅱ5A0334	Cucumis sativus var. sativus
CG1742	Zhang Dian Si Gua Qing	China, Shandong	P1	IVF-CAAS	Ⅱ5A0335	Cucumis sativus var. sativus
CG1743	Teng Xian Qiu Huang Gua	China, Shandong	P1	IVF-CAAS	Ⅱ5A0172	Cucumis sativus var. sativus
CG1744	Xia Huang Gua	China, Shandong	P1	IVF-CAAS	Ⅱ5A0350	Cucumis sativus var. sativus
CG1745	Di Huang Gua	China, Shandong	P1	IVF-CAAS	Ⅱ5A0802	Cucumis sativus var. sativus
CG1746	Da Ci Gua	China, Shandong	P1	IVF-CAAS	Ⅱ5A0325	Cucumis sativus var. sativus
CG1747	Yan Tai Da Ba Cha	China, Shandong	P1	IVF-CAAS	Ⅱ5A0158	Cucumis sativus var. sativus
CG1748	Si Ye	China, Shandong	P1	IVF-CAAS	Ⅱ5A0323	Cucumis sativus var. sativus
CG1749	Yan Tai Ban Xia Huang Gua	China, Shandong	P1	IVF-CAAS	Ⅱ5A0446	Cucumis sativus var. sativus
CG1750	Zhu Cheng Jin Si Mi Ci	China, Shandong	P1	IVF-CAAS	Ⅱ5A0766	Cucumis sativus var. sativus
CG1751	Huang Gua	China, Shandong	P1	IVF-CAAS	Ⅱ5A0615	Cucumis sativus var. sativus
CG1752	Huang Gua	China, Shandong	P1	IVF-CAAS	Ⅱ5A0774	Cucumis sativus var. sativus
CG1753	Si Ye Huang Gua	China, Shandong	P1	IVF-CAAS	Ⅱ5A0765	Cucumis sativus var. sativus
CG1754	Huang Gua	China, Shandong	P1	IVF-CAAS	Ⅱ5A0341	Cucumis sativus var. sativus
CG1755	Peng Lai Ye Er San(Xian Gua)	China, Shandong	P1	IVF-CAAS	Ⅱ5A0250	Cucumis sativus var. sativus
CG1756	Deng Wang Di Huang Gua	China, Shandong	P1	IVF-CAAS	Ⅱ5A1037	Cucumis sativus var. sativus
CG1757	Liao Cheng Chun Dao Qiu	China, Shandong	P1	IVF-CAAS	Ⅱ5A0169	Cucumis sativus var. sativus
CG1758	Xian Gua	China, Shandong	P1	IVF-CAAS	Ⅱ5A0346	Cucumis sativus var. sativus
CG1759	Ci Gua	China, Shandong	P1	IVF-CAAS	Ⅱ5A0799	Cucumis sativus var. sativus
CG1760	Jiao Nan Ci Gua	China, Shandong	P1	IVF-CAAS	Ⅱ5A1034	Cucumis sativus var. sativus
CG1761	Jiao Xian Di Huang Gua	China, Shandong	P1	IVF-CAAS	Ⅱ5A0157	Cucumis sativus var. sativus
CG1762	Huang Gua	China, Shandong	P1	IVF-CAAS	Ⅱ5A0780	Cucumis sativus var. sativus
CG1763	Chun Dao Qiu	China, Shandong	P1	IVF-CAAS	Ⅱ5A0345	Cucumis sativus var. sativus
CG1764	Bai Huang Gua	China, Shandong	P1	IVF-CAAS	Ⅱ5A0794	Cucumis sativus var. sativus
CG1765	Qiu Huang Gua	China, Shandong	P1	IVF-CAAS	Ⅱ5A0321	Cucumis sativus var. sativus
CG1766	He Ze Zao Jia Ci Gua	China, Shandong	P1	IVF-CAAS	Ⅱ5A1028	Cucumis sativus var. sativus
CG1767	Chun Huang Gua	China, Shandong	P1	IVF-CAAS	Ⅱ5A0784	Cucumis sativus var. sativus
CG1768	Qiu Huang Gua	China, Shandong	P1	IVF-CAAS	Ⅱ5A0785	Cucumis sativus var. sativus
CG1769	Chun Huang Gua	China, Shandong	P1	IVF-CAAS	Ⅱ5A0781	Cucumis sativus var. sativus
CG1770	Ban Xian Gan	China, Shandong	P1	IVF-CAAS	Ⅱ5A0782	Cucumis sativus var. sativus
CG1771	Xian Huang Gua	China, Shandong	P1	IVF-CAAS	Ⅱ5A0783	Cucumis sativus var. sativus
CG1772	Qiu Huang Gua	China, Shandong	P1	IVF-CAAS	Ⅱ5A0793	Cucumis sativus var. sativus
CG1773	Da Ba Cha	China, Shandong	P1	IVF-CAAS	Ⅱ5A0798	Cucumis sativus var. sativus
CG1774	Qiu Huang Gua	China, Shandong	P1	IVF-CAAS	Ⅱ5A0357	Cucumis sativus var. sativus
CG1775	Ba Da Cha	China, Shandong	P1	IVF-CAAS	Ⅱ5A0809	Cucumis sativus var. sativus
CG1776	Ye Er San	China, Shandong	P1	IVF-CAAS	Ⅱ5A0810	Cucumis sativus var. sativus
CG1777	Huang Gua	China, Shandong	P1	IVF-CAAS	Ⅱ5A0770	Cucumis sativus var. sativus
CG1778	Huang Gua	China, Shandong	P1	IVF-CAAS	Ⅱ5A0771	Cucumis sativus var. sativus
CG1779	Mi Ci 90002	China, Shandong	P1	IVF-CAAS	Ⅱ5A1490	Cucumis sativus var. sativus
CG1780	Bai Huang Gua	China, Shandong	P1	IVF-CAAS	Ⅱ5A1491	Cucumis sativus var. sativus
CG1781	Lai Yang Huang Gua	China, Shandong	P1	IVF-CAAS	Ⅱ5A0160	Cucumis sativus var. sativus
CG1782	Lai Yang Ba Da Cha	China, Shandong	P1	IVF-CAAS	Ⅱ5A0161	Cucumis sativus var. sativus
CG1783	Qiu Huang Gua	China, Shandong	P1	IVF-CAAS	Ⅱ5A0617	Cucumis sativus var. sativus
CG1784	Di Huang Gua	China, Shandong	P1	IVF-CAAS	Ⅱ5A0358	Cucumis sativus var. sativus
CG1785	Huang Gua	China, Shandong	P1	IVF-CAAS	Ⅱ5A0359	Cucumis sativus var. sativus
CG1786	38173	China, Shandong	P1	IVF-CAAS	Ⅱ5A1350	Cucumis sativus var. sativus
CG1787	76944	China, Shandong	P1	IVF-CAAS	Ⅱ5A1351	Cucumis sativus var. sativus
CG1788	84-A2	China, Shandong	P1	IVF-CAAS	Ⅱ5A1175	Cucumis sativus var. sativus
CG1789	84-B4	China, Shandong	P1	IVF-CAAS	Ⅱ5A1176	Cucumis sativus var. sativus
CG1790	124 Zi Jiao Xi	China, Shandong	P1	IVF-CAAS	Ⅱ5A1179	Cucumis sativus var. sativus
CG1791	36111Zi Jiao Xi	China, Shandong	P1	IVF-CAAS	Ⅱ5A1180	Cucumis sativus var. sativus
CG1792	5411Zi Jiao Xi	China, Shandong	P1	IVF-CAAS	Ⅱ5A1181	Cucumis sativus var. sativus
CG1793	65112Zi Jiao Xi	China, Shandong	P1	IVF-CAAS	Ⅱ5A1182	Cucumis sativus var. sativus
CG1794	Chun Di Gua	China, Shandong	P1	IVF-CAAS	Ⅱ5A1053	Cucumis sativus var. sativus
CG1795	Zhu Cheng Yi Wo Feng	China, Shandong	P1	IVF-CAAS	Ⅱ5A0163	Cucumis sativus var. sativus
CG1796	Zhu Cheng Da Ci	China, Shandong	P1	IVF-CAAS	Ⅱ5A0164	Cucumis sativus var. sativus
CG1797	Chun Huang Gua	China, Shandong	P1	IVF-CAAS	Ⅱ5A0772	Cucumis sativus var. sativus
CG1798	Qiu Huang Gua	China, Shandong	P1	IVF-CAAS	Ⅱ5A0366	Cucumis sativus var. sativus
CG1799	Xian Gua	China, Shandong	P1	IVF-CAAS	Ⅱ5A0817	Cucumis sativus var. sativus
CG1800	Chun Dao Qiu	China, Shandong	P1	IVF-CAAS	Ⅱ5A0803	Cucumis sativus var. sativus
CG1801	Qiu Huang Gua	China, Shandong	P1	IVF-CAAS	Ⅱ5A0804	Cucumis sativus var. sativus
CG1802	You Pi	China, Shandong	P1	IVF-CAAS	Ⅱ5A0786	Cucumis sativus var. sativus
CG1803	Xiang Bi Zi	China, Shandong	P1	IVF-CAAS	Ⅱ5A0787	Cucumis sativus var. sativus
CG1804	Juan Cheng Jia Huang Gua	China, Shandong	P1	IVF-CAAS	Ⅱ5A1033	Cucumis sativus var. sativus
CG1805	Jin Xiang Chun Huang Gua	China, Shandong	P1	IVF-CAAS	Ⅱ5A0165	Cucumis sativus var. sativus
CG1806	Qiu Huang Gua	China, Shandong	P1	IVF-CAAS	Ⅱ5A0327	Cucumis sativus var. sativus
CG1807	Di Huang Gua	China, Shandong	P1	IVF-CAAS	Ⅱ5A0363	Cucumis sativus var. sativus
CG1808	Huang Gua	China, Shandong	P1	IVF-CAAS	Ⅱ5A1174	Cucumis sativus var. sativus
CG1809	Di Huang Gua	China, Shandong	P1	IVF-CAAS	Ⅱ5A0343	Cucumis sativus var. sativus
CG1810	Da Qing Tiao	China, Shandong	P1	IVF-CAAS	Ⅱ5A0812	Cucumis sativus var. sativus
CG1811	Qing Dao Qiu Ye Er San	China, Shandong	P1	IVF-CAAS	Ⅱ5A0173	Cucumis sativus var. sativus
CG1812	Chun Ye Er San	China, Shandong	P1	IVF-CAAS	Ⅱ5A0820	Cucumis sativus var. sativus
CG1813	Bai Ci Xian Gua	China, Shandong	P1	IVF-CAAS	Ⅱ5A0795	Cucumis sativus var. sativus
CG1814	Bai Ci Di Huang Gua	China, Shandong	P1	IVF-CAAS	Ⅱ5A0796	Cucumis sativus var. sativus
CG1815	Ba Zi Tou	China, Shandong	P1	IVF-CAAS	Ⅱ5A0352	Cucumis sativus var. sativus
CG1816	Qiu Huang Gua	China, Shandong	P1	IVF-CAAS	Ⅱ5A0324	Cucumis sativus var. sativus
CG1817	Wei Hua Huang Gua	China, Shandong	P1	IVF-CAAS	Ⅱ5A0818	Cucumis sativus var. sativus
CG1818	Wu Xi Zao	China, Jiangsu	P1	IVF-CAAS	Ⅱ5A1013	Cucumis sativus var. sativus
CG1819	Duan Huang Gua	China, Jiangsu	P1	IVF-CAAS	Ⅱ5A1127	Cucumis sativus var. sativus
CG1820	Nan Yuan Huang Gua	China, Jiangsu	P1	IVF-CAAS	Ⅱ5A0256	Cucumis sativus var. sativus
CG1821	Chun Huang Gua	China, Jiangsu	P1	IVF-CAAS	Ⅱ5A0893	Cucumis sativus var. sativus
CG1822	Huang Pi Huang Gua	China, Jiangsu	P1	IVF-CAAS	Ⅱ5A0909	Cucumis sativus var. sativus
CG1823	Bai Ci Huang Gua	China, Jiangsu	P1	IVF-CAAS	Ⅱ5A0911	Cucumis sativus var. sativus
CG1824	Su Duan	China, Jiangsu	P1	IVF-CAAS	Ⅱ5A0931	Cucumis sativus var. sativus
CG1825	Su Zhou Huang Gua	China, Jiangsu	P1	IVF-CAAS	Ⅱ5A0962	Cucumis sativus var. sativus
CG1826	Cao Huang Gua	China, Jiangsu	P1	IVF-CAAS	Ⅱ5A0278	Cucumis sativus var. sativus
CG1827	Dan Yang Huang Pi Huang Gua	China, Jiangsu	P1	IVF-CAAS	Ⅱ5A0756	Cucumis sativus var. sativus
CG1828	Cha Ting Huang Gua	China, Jiangsu	P1	IVF-CAAS	Ⅱ5A0023	Cucumis sativus var. sativus
CG1829	Nan Jing You Pi	China, Jiangsu	P1	IVF-CAAS	Ⅱ5A0472	Cucumis sativus var. sativus
CG1830	Mu Xu Yuan Ci Gua	China, Jiangsu	P1	IVF-CAAS	Ⅱ5A0757	Cucumis sativus var. sativus
CG1831	Nan Jing Ci Gua	China, Jiangsu	P1	IVF-CAAS	Ⅱ5A0822	Cucumis sativus var. sativus
CG1832	Yang Xing Huang Gua	China, Jiangsu	P1	IVF-CAAS	Ⅱ5A0204	Cucumis sativus var. sativus
CG1833	Nan Tong Huang Gua	China, Jiangsu	P1	IVF-CAAS	Ⅱ5A0474	Cucumis sativus var. sativus
CG1834	Bai Ci Huang Gua	China, Jiangsu	P1	IVF-CAAS	Ⅱ5A0473	Cucumis sativus var. sativus
CG1835	Xiao Huang Gua	China, Jiangsu	P1	IVF-CAAS	Ⅱ5A0237	Cucumis sativus var. sativus
CG1836	Tai Cang Huang Gua	China, Jiangsu	P1	IVF-CAAS	Ⅱ5A0852	Cucumis sativus var. sativus
CG1837	Nab Cai Di Huang Gua	China, Jiangsu	P1	IVF-CAAS	Ⅱ5A1003	Cucumis sativus var. sativus
CG1838	Chang Zhou Huang Gua	China, Jiangsu	P1	IVF-CAAS	Ⅱ5A0207	Cucumis sativus var. sativus
CG1839	Nan Yuan	China, Jiangsu	P1	IVF-CAAS	Ⅱ5A0436	Cucumis sativus var. sativus
CG1840	Ye Er San	China, Jiangsu	P1	IVF-CAAS	Ⅱ5A0455	Cucumis sativus var. sativus
CG1841	Ye Er San Huang Gua	China, Jiangsu	P1	IVF-CAAS	Ⅱ5A0823	Cucumis sativus var. sativus
CG1842	Du Gua(Ru Huang Gua)	China, Jiangsu	P1	IVF-CAAS	Ⅱ5A0235	Cucumis sativus var. sativus
CG1843	You Pi Huang Gua	China, Jiangsu	P1	IVF-CAAS	Ⅱ5A1001	Cucumis sativus var. sativus
CG1844	Xiang Bi Huang Gua	China, Jiangsu	P1	IVF-CAAS	Ⅱ5A0039	Cucumis sativus var. sativus
CG1845	Ben Di Huang Gua	China, Jiangsu	P1	IVF-CAAS	Ⅱ5A0206	Cucumis sativus var. sativus
CG1846	Wu Xi Zao	China, Jiangsu	P1	IVF-CAAS	Ⅱ5A0412	Cucumis sativus var. sativus
CG1847	Li Yang Huang Gua	China, Jiangsu	P1	IVF-CAAS	Ⅱ5A0205	Cucumis sativus var. sativus
CG1848	San Ye Zao Huang Gua	China, Jiangsu	P1	IVF-CAAS	Ⅱ5A1106	Cucumis sativus var. sativus
CG1849	Xian Huang Gua	China, Jiangsu	P1	IVF-CAAS	Ⅱ5A0234	Cucumis sativus var. sativus
CG1850	Bai Pi Huang Gua	China, Jiangsu	P1	IVF-CAAS	Ⅱ5A0034	Cucumis sativus var. sativus
CG1851	Liu Yuan Huang Gua	China, Jiangsu	P1	IVF-CAAS	Ⅱ5A0762	Cucumis sativus var. sativus
CG1852	Bao Zhang Huang Gua	China, Jiangsu	P1	IVF-CAAS	Ⅱ5A0851	Cucumis sativus var. sativus
CG1853	Chun Huang Gua	China, Jiangsu	P1	IVF-CAAS	Ⅱ5A0988	Cucumis sativus var. sativus
CG1854	Hong Men Huang Gua	China, Jiangsu	P1	IVF-CAAS	Ⅱ5A0277	Cucumis sativus var. sativus
CG1855	Tan Shan Ci Gua	China, Jiangsu	P1	IVF-CAAS	Ⅱ5A1000	Cucumis sativus var. sativus
CG1856	Hang Pi Huang Gua	China, Jiangsu	P1	IVF-CAAS	Ⅱ5A0238	Cucumis sativus var. sativus
CG1857	Xin Tai Mi Ci	China, Shandong	P1	IVF-CAAS	Ⅱ5A0675	Cucumis sativus var. sativus
CG1858	Feng Hao Huang Gua(Bai Ci)	China, Shandong	P1	IVF-CAAS	Ⅱ5A0867	Cucumis sativus var. sativus
CG1859	Shanghai Yu Bai Pi Huang Gua	China, Zhejiang	P1	IVF-CAAS	Ⅱ5A0479	Cucumis sativus var. sativus
CG1860	Bai Pi Huang Gua	China, Jiangsu	P1	IVF-CAAS	Ⅱ5A1398	Cucumis sativus var. sativus
CG1861	Jia Xing Qing Pi Huang Gua	China, Shandong	P1	IVF-CAAS	Ⅱ5A0142	Cucumis sativus var. sativus
CG1862	Wen Cheng Qing Pi Huang Gua	China, Shandong	P1	IVF-CAAS	Ⅱ5A1092	Cucumis sativus var. sativus
CG1863	Hang Zhou Qing Pi	China, Zhejiang	P1	IVF-CAAS	Ⅱ5A1116	Cucumis sativus var. sativus
CG1864	Da Zhong Huang Gua	China, Jiangsu	P1	IVF-CAAS	Ⅱ5A0028	Cucumis sativus var. sativus
CG1865	Long You Huang Gua	China, Shandong	P1	IVF-CAAS	Ⅱ5A0478	Cucumis sativus var. sativus
CG1866	Hai Yan Bai Pi Huang Gua	China, Shandong	P1	IVF-CAAS	Ⅱ5A0480	Cucumis sativus var. sativus
CG1867	Rui An Tu Zhong Huang Gua	China, Zhejiang	P1	IVF-CAAS	Ⅱ5A1111	Cucumis sativus var. sativus
CG1868	Shao Xing Ru Huang Gua	China, Jiangsu	P1	IVF-CAAS	Ⅱ5A0458	Cucumis sativus var. sativus
CG1869	Yan Tai Qiu Gua	China, Shandong	P1	IVF-CAAS	Ⅱ5A0904	Cucumis sativus var. sativus
CG1870	He Ze Huang Gua	China, Shandong	P1	IVF-CAAS	Ⅱ5A0967	Cucumis sativus var. sativus
CG1871	Zhen Jiang Huang Gua	China, Jiangsu	P1	IVF-CAAS	Ⅱ5A0966	Cucumis sativus var. sativus
CG1872	243X715	China	P1	CGN	CGN19816	Cucumis sativus var. sativus
CG1873	Shantung Thorny	China	P1	CGN	CGN20203	Cucumis sativus var. sativus
CG1874	Peking Thorny	China	P1	CGN	CGN20204	Cucumis sativus var. sativus
CG1875	Lushun Jehersa	China	P1	CGN	CGN20205	Cucumis sativus var. sativus
CG1876	Cus124/71	China	P1	CGN	CGN20243	Cucumis sativus var. sativus
CG1877	Cus125/71	China	P1	CGN	CGN20244	Cucumis sativus var. sativus
CG1878	Long Green	China	P1	CGN	CGN20516	Cucumis sativus var. sativus
CG1879	Pekin Da Czu Gua	China	P1	CGN	CGN20852	Cucumis sativus var. sativus
CG1880	Ta-Hy-Tcy	China	P1	CGN	CGN20856	Cucumis sativus var. sativus
CG1881	Din Zo Ni	China	P1	CGN	CGN20882	Cucumis sativus var. sativus
CG1882	Nanhai 2 Aouri	China	P1	CGN	CGN20885	Cucumis sativus var. sativus
CG1883	Cus121/73	China	P1	CGN	CGN21667	Cucumis sativus var. sativus
CG1884	Pekin	China	P1	CGN	CGN21697	Cucumis sativus var. sativus
CG1885	Cgn22274	China	P1	CGN	CGN22274	Cucumis sativus var. sativus
CG1886	Cgn22275	China	P1	CGN	CGN22275	Cucumis sativus var. sativus
CG1887	Ji Huano Gua 2 Hao	China	P1	CGN	CGN23391	Cucumis sativus var. sativus
CG1888	Kai Tu Di Huang Gua	China	P1	CGN	CGN23392	Cucumis sativus var. sativus
CG1889	Lu Chun 26	China	P1	CGN	CGN23393	Cucumis sativus var. sativus
CG1890	Lu Chun 32	China	P1	CGN	CGN23394	Cucumis sativus var. sativus
CG1891	Hang Pi Hei Ci	China	P1	CGN	CGN23396	Cucumis sativus var. sativus
CG1892	Pekin Cze Tou Chuan Gua	China	P1	CGN	CGN23560	Cucumis sativus var. sativus
CG1893	Ding Xian Ci Gua	China	P1	IVF-CAAS	Ⅱ5A0996	Cucumis sativus var. sativus
CG1894	Shan Huang Gua	China	P1	IVF-CAAS	Ⅱ5A0997	Cucumis sativus var. sativus
CG1895	Da Ba Cha	China	P1	IVF-CAAS	Ⅱ5A0111	Cucumis sativus var. sativus
CG1896	Han Huang Gua	China	P1	IVF-CAAS	Ⅱ5A0113	Cucumis sativus var. sativus
CG1897	Ben Di Huang Gua	China	P1	IVF-CAAS	Ⅱ5A0116	Cucumis sativus var. sativus
CG1898	Di Huang Gua	China	P1	IVF-CAAS	Ⅱ5A0117	Cucumis sativus var. sativus
CG1899	Ben Di Huang Gua	China	P1	IVF-CAAS	Ⅱ5A0118	Cucumis sativus var. sativus
CG1900	Huang Gua	China	P1	IVF-CAAS	Ⅱ5A0119	Cucumis sativus var. sativus
CG1901	Ba Gu Cha(Pa Gua)	China	P1	IVF-CAAS	Ⅱ5A0120	Cucumis sativus var. sativus
CG1902	Yi Mu San Tai	China	P1	IVF-CAAS	Ⅱ5A0121	Cucumis sativus var. sativus
CG1903	Qing Huang Gua	China	P1	IVF-CAAS	Ⅱ5A0122	Cucumis sativus var. sativus
CG1904	Bai Se Huang Gua	China	P1	IVF-CAAS	Ⅱ5A0123	Cucumis sativus var. sativus
CG1905	Lv Se Huang Gua	China	P1	IVF-CAAS	Ⅱ5A0124	Cucumis sativus var. sativus
CG1906	Ba Gu Cha	China	P1	IVF-CAAS	Ⅱ5A0125	Cucumis sativus var. sativus
CG1907	San Pian Ye	China	P1	IVF-CAAS	Ⅱ5A0126	Cucumis sativus var. sativus
CG1908	Duan Huang Gua	China	P1	IVF-CAAS	Ⅱ5A0127	Cucumis sativus var. sativus
CG1909	Xian Huang Gua	China	P1	IVF-CAAS	Ⅱ5A0128	Cucumis sativus var. sativus
CG1910	Mu Zhu Wo	China	P1	IVF-CAAS	Ⅱ5A0129	Cucumis sativus var. sativus
CG1911	Ben Di Huang Gua	China	P1	IVF-CAAS	Ⅱ5A0131	Cucumis sativus var. sativus
CG1912	Lv Pi Huang Gua	China	P1	IVF-CAAS	Ⅱ5A0132	Cucumis sativus var. sativus
CG1913	Huang Gua	China	P1	IVF-CAAS	Ⅱ5A0133	Cucumis sativus var. sativus
CG1914	Ye Er San	China	P1	IVF-CAAS	Ⅱ5A0134	Cucumis sativus var. sativus
CG1915	Ye Er San	China	P1	IVF-CAAS	Ⅱ5A0135	Cucumis sativus var. sativus
CG1916	Bao Kang Huang San	China	P1	IVF-CAAS	Ⅱ5A0422	Cucumis sativus var. sativus
CG1917	Chun Qiu Huang Gua	China	P1	IVF-CAAS	Ⅱ5A0438	Cucumis sativus var. sativus
CG1918	Dong Zhi Huang Gua	China	P1	IVF-CAAS	Ⅱ5A0467	Cucumis sativus var. sativus
CG1919	Da Huang Gua	China	P1	IVF-CAAS	Ⅱ5A0468	Cucumis sativus var. sativus
CG1920	Huang Gua	China	P1	IVF-CAAS	Ⅱ5A0469	Cucumis sativus var. sativus
CG1921	Huang Gua	China	P1	IVF-CAAS	Ⅱ5A0470	Cucumis sativus var. sativus
CG1922	Huang Gua	China	P1	IVF-CAAS	Ⅱ5A0471	Cucumis sativus var. sativus
CG1923	Hang Gua	China	P1	IVF-CAAS	Ⅱ5A0105	Cucumis sativus var. sativus
CG1924	Ci Gua	China	P1	IVF-CAAS	Ⅱ5A0107	Cucumis sativus var. sativus
CG1925	Ye Er San	China	P1	IVF-CAAS	Ⅱ5A0109	Cucumis sativus var. sativus
CG1926	Da Qing Pi Qiu Gua	China	P1	IVF-CAAS	Ⅱ5A0110	Cucumis sativus var. sativus
CG1927	87404	China	P1	IVF-CAAS	Ⅱ5A1390	Cucumis sativus var. sativus
CG1928	Nan Yang Huang Gua	China	P1	IVF-CAAS	Ⅱ5A0998	Cucumis sativus var. sativus
CG1929	Huang Gua	China	P1	IVF-CAAS	Ⅱ5A0253	Cucumis sativus var. sativus
CG1930	Ye San Qiu Huang Gua	China	P1	IVF-CAAS	Ⅱ5A0410	Cucumis sativus var. sativus
CG1931	Dong Bei Huang Gua	China	P1	IVF-CAAS	Ⅱ5A0411	Cucumis sativus var. sativus
CG1932	Bai Pi Ci Gua	China	P1	IVF-CAAS	Ⅱ5A0416	Cucumis sativus var. sativus
CG1933	Shui Huang Gua	China	P1	IVF-CAAS	Ⅱ5A0425	Cucumis sativus var. sativus
CG1934	Qiu Huang Gua	China	P1	IVF-CAAS	Ⅱ5A0428	Cucumis sativus var. sativus
CG1935	Zi Bo Ye San	China	P1	IVF-CAAS	Ⅱ5A0429	Cucumis sativus var. sativus
CG1936	San Gua	China	P1	IVF-CAAS	Ⅱ5A0434	Cucumis sativus var. sativus
CG1937	Yuan Qiu	China	P1	IVF-CAAS	Ⅱ5A0447	Cucumis sativus var. sativus
CG1938	Yin Chuan Xian Huang Gua	China	P1	IVF-CAAS	Ⅱ5A1150	Cucumis sativus var. sativus
CG1939	Shen He Ye San	China	P1	IVF-CAAS	Ⅱ5A1151	Cucumis sativus var. sativus
CG1940	Wu Xi Huang Gua	China	P1	IVF-CAAS	Ⅱ5A1152	Cucumis sativus var. sativus
CG1941	Fu Zhou Qiu Gua	China	P1	IVF-CAAS	Ⅱ5A1153	Cucumis sativus var. sativus
CG1942	Tang Shan Bang Chui Gua	China	P1	IVF-CAAS	Ⅱ5A1154	Cucumis sativus var. sativus
CG1943	Man Jia Tun	China	P1	IVF-CAAS	Ⅱ5A1155	Cucumis sativus var. sativus
CG1944	Shi Yan Bang Chui Gua	China	P1	IVF-CAAS	Ⅱ5A1156	Cucumis sativus var. sativus
CG1945	Wang Li Zao Huang Gua	China	P1	IVF-CAAS	Ⅱ5A1157	Cucumis sativus var. sativus
CG1946	Ning Yang Ci Gua	China	P1	IVF-CAAS	Ⅱ5A1158	Cucumis sativus var. sativus
CG1947	Zhu Cheng Huang Gua	China	P1	IVF-CAAS	Ⅱ5A1159	Cucumis sativus var. sativus
CG1948	Hang Zhou Qing Pi	China	P1	IVF-CAAS	Ⅱ5A1160	Cucumis sativus var. sativus
CG1949	Da Hei Ci	China	P1	IVF-CAAS	Ⅱ5A0607	Cucumis sativus var. sativus
CG1950	Jia Xiang Di Huang Gua	China	P1	IVF-CAAS	Ⅱ5A0915	Cucumis sativus var. sativus
CG1951	Duan Ba Cu	China	P1	IVF-CAAS	Ⅱ5A0661	Cucumis sativus var. sativus
CG1952	Ping Wang Ru Huang Gua	China	P1	IVF-CAAS	Ⅱ5A0688	Cucumis sativus var. sativus
CG1953	Qing Bai Huang Gua	China	P1	IVF-CAAS	Ⅱ5A0968	Cucumis sativus var. sativus
CG1954	Qing Xing Yi Hao	China	P1	IVF-CAAS	Ⅱ5A0956	Cucumis sativus var. sativus
CG1955	Da Ci Gua	China	P1	IVF-CAAS	Ⅱ5A0664	Cucumis sativus var. sativus
CG1956	Xi Yan Er Hao	China	P1	IVF-CAAS	Ⅱ5A0658	Cucumis sativus var. sativus
CG1957	Qing Pi Gua	China	P1	IVF-CAAS	Ⅱ5A0960	Cucumis sativus var. sativus
CG1958	Jie D	China	P1	IVF-CAAS	Ⅱ5A0662	Cucumis sativus var. sativus
CG1959	Czin-Pi-Czao	China	P1	CGN	CGN21671	Cucumis sativus var. sativus
CG1960	G1668	NA	P1	IVF-CAAS	G1668	Cucumis sativus var. sativus
CG1961	Wen Shi Pen Xuan	China, Tianjin	P1P2	IVF-CAAS	Ⅱ5A0647	Cucumis sativus var. sativus
CG1962	Qian Huang Pi Huang Gua	China, Sinkiang	P1P2	IVF-CAAS	Ⅱ5A1299	Cucumis sativus var. sativus
CG1963	Jin Zhou Huang Gua	China, Jinzhou	P1P2	IVF-CAAS	Ⅱ5A0454	Cucumis sativus var. sativus
CG1964	Hei Han Tui	China, Shanxi	P1P2	IVF-CAAS	Ⅱ5A0418	Cucumis sativus var. sativus
CG1965	Yang Zhou Ru Huang Gua	China, Jiangsu	P1P2	IVF-CAAS	Ⅱ5A0426	Cucumis sativus var. sativus
CG1966	Hong Lan Huang Gua	China, Jiangsu	P1P2	IVF-CAAS	Ⅱ5A0476	Cucumis sativus var. sativus
CG1967	Shan-Dun-Tcy-Gua (Shandunskii)	China	P1P2	CGN	CGN19697	Cucumis sativus var. sativus
CG1968	Rannii	China	P1P2	CGN	CGN19727	Cucumis sativus var. sativus
CG1969	Melkii	China	P1P2	CGN	CGN19728	Cucumis sativus var. sativus
CG1970	Wjr1321	China	P1P2	CGN	CGN19809	Cucumis sativus var. sativus
CG1971	247	China	P1P2	CGN	CGN19814	Cucumis sativus var. sativus
CG1972	Wjr558	China	P1P2	CGN	CGN20883	Cucumis sativus var. sativus
CG1973	Shantunger	China	P1P2	CGN	CGN22245	Cucumis sativus var. sativus
CG1974	Gui Yang Huang Gua	China	P1P2	IVF-CAAS	Ⅱ5A0423	Cucumis sativus var. sativus
CG1975	Bai Pi Qiu Ci Gua	China	P1P2	IVF-CAAS	Ⅱ5A0430	Cucumis sativus var. sativus
CG1976	Xiao Huang Gua	China, Heilongjiang	P1P2	IVF-CAAS	Ⅱ5A1413	Cucumis sativus var. sativus
CG1977	Hong Men Ci Gua	China, Jiangsu	P1P2	IVF-CAAS	Ⅱ5A0437	Cucumis sativus var. sativus
CG1978	Jin Yan Si Hao	China, Tianjin	P1P3	IVF-CAAS	Ⅱ5A0001	Cucumis sativus var. sativus
CG1979	Huang Gua	China, Shanxi	P1P3	IVF-CAAS	Ⅱ5A0091	Cucumis sativus var. sativus
CG1980	Ben Di Huang Gua	China, Sinkiang	P1P3	IVF-CAAS	Ⅱ5A1100	Cucumis sativus var. sativus
CG1981	Bai Cheng Zi Gua	China, Liaoning	P1P3	IVF-CAAS	Ⅱ5A0666	Cucumis sativus var. sativus
CG1982	Lue Yang Di Huang Gua	China, Shanxi	P1P3	IVF-CAAS	Ⅱ5A1162	Cucumis sativus var. sativus
CG1983	Qiu Huang Gua	China, Shandong	P1P3	IVF-CAAS	Ⅱ5A0348	Cucumis sativus var. sativus
CG1984	Qiu Huang Gua	China, Shandong	P1P3	IVF-CAAS	Ⅱ5A0336	Cucumis sativus var. sativus
CG1985	Yan Tai Qiu Gua	China, Shandong	P1P3	IVF-CAAS	Ⅱ5A1048	Cucumis sativus var. sativus
CG1986	Da Qing Pi	China, Shandong	P1P3	IVF-CAAS	Ⅱ5A0354	Cucumis sativus var. sativus
CG1987	Di Huang Gua	China, Shandong	P1P3	IVF-CAAS	Ⅱ5A1171	Cucumis sativus var. sativus
CG1988	Di Huang Gua	China, Shandong	P1P3	IVF-CAAS	Ⅱ5A0344	Cucumis sativus var. sativus
CG1989	Hei You Tiao	China, Shandong	P1P3	IVF-CAAS	Ⅱ5A0451	Cucumis sativus var. sativus
CG1990	Nan Tong Di Huang Gua	China, Jiangsu	P1P3	IVF-CAAS	Ⅱ5A1432	Cucumis sativus var. sativus
CG1991	Jian She Huan Gua	China, Jiangsu	P1P3	IVF-CAAS	Ⅱ5A0703	Cucumis sativus var. sativus
CG1992	Ben Di Huang Gua	China, Jiangsu	P1P3	IVF-CAAS	Ⅱ5A0477	Cucumis sativus var. sativus
CG1993	Ru Huang Gua	China, Zhejiang	P1P3	IVF-CAAS	Ⅱ5A0029	Cucumis sativus var. sativus
CG1994	Yu Du Bai Huang Gua	China, Zhejiang	P1P3	IVF-CAAS	Ⅱ5A0488	Cucumis sativus var. sativus
CG1995	Yao Shan Huang Gua	China, Zhejiang	P1P3	IVF-CAAS	Ⅱ5A0369	Cucumis sativus var. sativus
CG1996	Qing Pi Huang Gua	China	P1P3	IVF-CAAS	Ⅱ5A0130	Cucumis sativus var. sativus
CG1997	Shou Pi Qing Huang Gua	China, Henan	P1P3	IVF-CAAS	Ⅱ5A0644	Cucumis sativus var. sativus
CG1998	WJR585	China	P2	CGN	CGN20884	Cucumis sativus var. sativus
CG1999	Ning Ling Huang Gua	China, Henan	P2P3	IVF-CAAS	Ⅱ5A1255	Cucumis sativus var. sativus
CG3000	Kyoto Three Feet	Japan	P1	NPGS	PI 400270	Cucumis sativus var. sativus
CG3001	Natsu-Fushnari	Japan	P1	NPGS	PI 279465	Cucumis sativus var. sativus
CG3002	Ochiai-Fushinari, Strain	Japan	P1	NPGS	PI 279466	Cucumis sativus var. sativus
CG3003	Yomaki Plant Ii	Japan	P1	NPGS	PI 288238	Cucumis sativus var. sativus
CG3004	Aodai Large Green	Japan	P1	CGN	CGN19680	Cucumis sativus var. sativus
CG3005	Sakata	Japan	P1	CGN	CGN19826	Cucumis sativus var. sativus
CG3006	Kariha	Japan	P1	CGN	CGN19827	Cucumis sativus var. sativus
CG3007	Kaga Fushinari	Japan	P1	CGN	CGN19829	Cucumis sativus var. sativus
CG3008	Fn Fushinari	Japan	P1	CGN	CGN20211	Cucumis sativus var. sativus
CG3009	Zibai	Japan	P1	CGN	CGN20272	Cucumis sativus var. sativus
CG3010	Sagami Hanpaku Fushinari Kyuri	Japan	P1	CGN	CGN20853	Cucumis sativus var. sativus
CG3011	Aonaga Suyo Kyuri	Japan	P1	CGN	CGN20854	Cucumis sativus var. sativus
CG3012	Kurume Ochiai 1	Japan	P1	CGN	CGN20886	Cucumis sativus var. sativus
CG3013	Santo	Japan	P1	CGN	CGN21615	Cucumis sativus var. sativus
CG3014	Vir 1187	Japan	P1	CGN	CGN21683	Cucumis sativus var. sativus
CG3015	Natsu Fushinari	Japan	P1	CGN	CGN21693	Cucumis sativus var. sativus
CG3016	Aonaga	Japan	P1	CGN	CGN21694	Cucumis sativus var. sativus
CG3017	Harigaya	Japan	P1	CGN	CGN21696	Cucumis sativus var. sativus
CG3018	Hyuuga 2	Japan	P1	CGN	CGN21698	Cucumis sativus var. sativus
CG3019	Late Summer	Japan	P1	CGN	CGN22231	Cucumis sativus var. sativus
CG3020	Nagaoka Longfellow	Japan	P1	CGN	CGN22253	Cucumis sativus var. sativus
CG3021	Kyoto Three Feet	Japan	P1	CGN	CGN22271	Cucumis sativus var. sativus
CG3022	Cgn22276	Japan	P1	CGN	CGN22276	Cucumis sativus var. sativus
CG3023	Shougoin Aonaga Fushinari Kyuri	Japan	P1	CGN	CGN22286	Cucumis sativus var. sativus
CG3024	Ochiai	Japan	P1	CGN	CGN22287	Cucumis sativus var. sativus
CG3025	Ao Fushinari	Japan	P1	CGN	CGN22288	Cucumis sativus var. sativus
CG3026	Toyooka Fushinari	Japan	P1	CGN	CGN22292	Cucumis sativus var. sativus
CG3027	Tokiwa B	Japan	P1	CGN	CGN22293	Cucumis sativus var. sativus
CG3028	Sairaku No 4	Japan	P1	CGN	CGN22294	Cucumis sativus var. sativus
CG3029	Shindome	Japan	P1	CGN	CGN22989	Cucumis sativus var. sativus
CG3030	Shogoin	Japan	P1	CGN	CGN22990	Cucumis sativus var. sativus
CG3031	Kurume Ochiai	Japan	P1	CGN	CGN22991	Cucumis sativus var. sativus
CG3032	Higan Fushinari	Japan	P1	CGN	CGN23418	Cucumis sativus var. sativus
CG3033	Kanazawa	Japan	P1	CGN	CGN23419	Cucumis sativus var. sativus
CG3034	Yokota Risshuu	Japan	P1	CGN	CGN23425	Cucumis sativus var. sativus
CG3035	Sunazu	Japan	P1	CGN	CGN23620	Cucumis sativus var. sativus
CG3036	Ri Ben Huang Gua	Japan	P1	IVF-CAAS	Ⅱ5A1021	Cucumis sativus var. sativus
CG3037	Jia He Jie	Japan	P1	IVF-CAAS	Ⅱ5A1089	Cucumis sativus var. sativus
CG3038	Bei Jin	Japan	P1	IVF-CAAS	Ⅱ5A1090	Cucumis sativus var. sativus
CG3039	Qing Li 2 Hao	Japan	P1	IVF-CAAS	Ⅱ5A1091	Cucumis sativus var. sativus
CG3040	Tong 15-3-0	Japan	P1	IVF-CAAS	Ⅱ5A1270	Cucumis sativus var. sativus
CG3041	Tong 14-1-0	Japan	P1	IVF-CAAS	Ⅱ5A1271	Cucumis sativus var. sativus
CG3042	Q-1-0	Japan	P1	IVF-CAAS	Ⅱ5A1272	Cucumis sativus var. sativus
CG3043	87503	Japan	P1	IVF-CAAS	Ⅱ5A1386	Cucumis sativus var. sativus
CG3044	Tokiwa Gibai	Japan	P1	IVF-CAAS	Ⅱ5A1388	Cucumis sativus var. sativus
CG3045	Beauty# 267	Japan	P1	IVF-CAAS	Ⅱ5A1389	Cucumis sativus var. sativus
CG3046	Ri Ben Si Ye	Japan	P1	IVF-CAAS	Ⅱ5A0450	Cucumis sativus var. sativus
CG3047	Xin Li Qiu Pu Fu Xing Huang Gua	Japan	P1	IVF-CAAS	Ⅱ5A0864	Cucumis sativus var. sativus
CG3048	Manchuko Wonder	Japan	P1	NPGS	PI 114339	Cucumis sativus var. sativus
CG3049	Tsuda-Sanjaku	Japan	P1	NPGS	PI 267935	Cucumis sativus var. sativus
CG3050	Chojitsu-Ochiai, F1 Hybr	Japan	P1	NPGS	PI 279463	Cucumis sativus var. sativus
CG3051	Kaga Aonaga-Fushinari	Japan	P1	NPGS	PI 279464	Cucumis sativus var. sativus
CG3052	Yomaki	Japan	P1	NPGS	PI 378066	Cucumis sativus var. sativus
CG3053	Aodai	Japan	P1	NPGS	PI 390238	Cucumis sativus var. sativus
CG3054	Ao Fushinari (A)	Japan	P1	NPGS	PI 390239	Cucumis sativus var. sativus
CG3055	Ao Fushinari (B)	Japan	P1	NPGS	PI 390240	Cucumis sativus var. sativus
CG3056	Aonaga Jihai	Japan	P1	NPGS	PI 390241	Cucumis sativus var. sativus
CG3057	Daisen Kema	Japan	P1	NPGS	PI 390242	Cucumis sativus var. sativus
CG3058	Kaga Aonaga Fushinari	Japan	P1	NPGS	PI 390248	Cucumis sativus var. sativus
CG3059	Kariha Fushinari	Japan	P1	NPGS	PI 390249	Cucumis sativus var. sativus
CG3060	Kurume Ochiai 1	Japan	P1	NPGS	PI 390251	Cucumis sativus var. sativus
CG3061	Mitani	Japan	P1	NPGS	PI 390252	Cucumis sativus var. sativus
CG3062	Peking	Japan	P1	NPGS	PI 390256	Cucumis sativus var. sativus
CG3063	Sagami Hanjiro (A)	Japan	P1	NPGS	PI 390259	Cucumis sativus var. sativus
CG3064	Sakata	Japan	P1	NPGS	PI 390261	Cucumis sativus var. sativus
CG3065	Santo (A)	Japan	P1	NPGS	PI 390262	Cucumis sativus var. sativus
CG3066	Shimoshirazu Jihai	Japan	P1	NPGS	PI 390263	Cucumis sativus var. sativus
CG3067	Shogoin Aonaga Fushinari	Japan	P1	NPGS	PI 390265	Cucumis sativus var. sativus
CG3068	Suyo (B)	Japan	P1	NPGS	PI 390266	Cucumis sativus var. sativus
CG3069	Tokiwa (B)	Japan	P1	NPGS	PI 390267	Cucumis sativus var. sativus
CG3070	Too Sanjaku	Japan	P1	NPGS	PI 390268	Cucumis sativus var. sativus
CG3071	Yamato Sanjalu	Japan	P1	NPGS	PI 390269	Cucumis sativus var. sativus
CG3072	Tu Pien Chiaosan Chi	Japan	P1	NPGS	PI 432852	Cucumis sativus var. sativus
CG3073	Ta Ho Shanchih 262	Japan	P1	NPGS	PI 432863	Cucumis sativus var. sativus
CG3074	I Yu Chiehcheng	Japan	P1	NPGS	PI 432864	Cucumis sativus var. sativus
CG3075	Kuan Chi Chiaopai Hasia	Japan	P1	NPGS	PI 432865	Cucumis sativus var. sativus
CG3076	Tsuda	Japan	P1	NPGS	PI 504563	Cucumis sativus var. sativus
CG3077	Sakata Kohai Fushinari	Japan	P1	NPGS	PI 532521	Cucumis sativus var. sativus
CG3078	Sakata Kurosango	Japan	P1	NPGS	PI 532522	Cucumis sativus var. sativus
CG3079	Sakata Natsusango	Japan	P1	NPGS	PI 532523	Cucumis sativus var. sativus
CG3080	Sakata Tokiwa Natsufuch	Japan	P1	NPGS	PI 532524	Cucumis sativus var. sativus
CG3081	Fukuoka Kurume Natuhusinari	Japan,	P1	NPGS	PI 212233	Cucumis sativus var. sativus
CG3082	Honshu Suyo	Japan,	P1	NPGS	PI 227207	Cucumis sativus var. sativus
CG3083	Honshu Yomaki-Asahi Aonaga	Japan,	P1	NPGS	PI 227208	Cucumis sativus var. sativus
CG3084	Honshu Sagami-Hangiro (Sagamih	Japan,	P1	NPGS	PI 227209	Cucumis sativus var. sativus
CG3085	Honshu Aibai	Japan,	P1	NPGS	PI 227210	Cucumis sativus var. sativus
CG3086	Kyoto Nagaoka Longfellow	Japan,	P1	NPGS	PI 267741	Cucumis sativus var. sativus
CG3087	Sekino No. 2 (Ochiai No.	Japan, Osaka	P1	NPGS	PI 267942	Cucumis sativus var. sativus
CG3088	Qing Wei San Chi Huang Gua	Korea	P1	IVF-CAAS	Ⅱ5A1486	Cucumis sativus var. sativus
CG3089	An Cheng Zai Lai	Korea	P1	IVF-CAAS	Ⅱ5A1507	Cucumis sativus var. sativus
CG3090	Shuang Bu Zhi Di Zhe	Korea	P1	IVF-CAAS	Ⅱ5A1508	Cucumis sativus var. sativus
CG3091	Gai Liang Di Zhe No.2	Korea	P1	IVF-CAAS	Ⅱ5A1509	Cucumis sativus var. sativus
CG3092	Jiu Luo No.3	Korea	P1	IVF-CAAS	Ⅱ5A1510	Cucumis sativus var. sativus
CG3093	Jin Cheng Si Cai	Korea	P1	IVF-CAAS	Ⅱ5A1511	Cucumis sativus var. sativus
CG3094	Neng Ben Jie Cheng	Korea	P1	IVF-CAAS	Ⅱ5A1512	Cucumis sativus var. sativus
CG3095	Da Xian Mao Ma No.1	Korea	P1	IVF-CAAS	Ⅱ5A1513	Cucumis sativus var. sativus
CG3096	Bing Ku San Chi	Korea	P1	IVF-CAAS	Ⅱ5A1515	Cucumis sativus var. sativus
CG3097	Xiang Mo Ban Bai	Korea	P1	IVF-CAAS	Ⅱ5A1516	Cucumis sativus var. sativus
CG3098	Husinari	Korea, South Kaga	P1	NPGS	PI 224668	Cucumis sativus var. sativus
CG3099	Hungnong Semiwhite	Korea, South, Inchon	P1	NPGS	PI 508453	Cucumis sativus var. sativus
CG3100	New Black Pearl	Korea, South, Inchon	P1	NPGS	PI 508454	Cucumis sativus var. sativus
CG3101	Summer Fresh	Korea, South, Inchon	P1	NPGS	PI 508455	Cucumis sativus var. sativus
CG3102	Green Titan	Korea, South, Inchon	P1	NPGS	PI 508457	Cucumis sativus var. sativus
CG3103	New Horse Silver	Korea, South, Inchon	P1	NPGS	PI 508458	Cucumis sativus var. sativus
CG3104	Smart Green	Korea, South, Inchon	P1	NPGS	PI 508459	Cucumis sativus var. sativus
CG3105	Summer Long	Korea, South, Inchon	P1	NPGS	PI 508460	Cucumis sativus var. sativus
CG3106	Banbaeg Tadagi F1	Korea, South, Seoul	P1	NPGS	PI 483339	Cucumis sativus var. sativus
CG3107	H. N. Semiwhitef1	Korea, South, Seoul	P1	NPGS	PI 483340	Cucumis sativus var. sativus
CG3108	Jinju F1 (Newblack Pear	Korea, South, Seoul	P1	NPGS	PI 483341	Cucumis sativus var. sativus
CG3109	Sunghweon F1	Korea, South, Seoul	P1	NPGS	PI 483344	Cucumis sativus var. sativus
CG3110	Chao Xian Huang Gua	Korea,north	P1	IVF-CAAS	Ⅱ5A0845	Cucumis sativus var. sativus
CG3111	Yamaki 67-842N	Japan	P1	CGN	CGN22235	Cucumis sativus var. sativus
CG3112	G10	NA	P1	IVF-CAAS	G10	Cucumis sativus var. sativus
CG3113	G390	Japan	P1	IVF-CAAS	G390	Cucumis sativus var. sativus
CG3114	G407	Japan	P1	IVF-CAAS	G407	Cucumis sativus var. sativus
CG3115	G473	Japan	P1	IVF-CAAS	G473	Cucumis sativus var. sativus
CG3116	G474	Japan	P1	IVF-CAAS	G474	Cucumis sativus var. sativus
CG3117	G475	Japan	P1	IVF-CAAS	G475	Cucumis sativus var. sativus
CG3118	G476	Japan	P1	IVF-CAAS	G476	Cucumis sativus var. sativus
CG3119	GW71	Japan	P1	IVF-CAAS	GW71	Cucumis sativus var. sativus
CG3120	GW72	Japan	P1	IVF-CAAS	GW72	Cucumis sativus var. sativus
CG3121	GW80	Japan	P1	IVF-CAAS	GW80	Cucumis sativus var. sativus
CG3122	Ochiai-Fushinari, Strain	Japan	P1P2	NPGS	PI 279467	Cucumis sativus var. sativus
CG3123	Ochiai-Fushinari, Improv	Japan	P1P2	NPGS	PI 279468	Cucumis sativus var. sativus
CG3124	Natsu Fushinari	Japan	P1P2	CGN	CGN19756	Cucumis sativus var. sativus
CG3125	Long-Day Ochiai	Japan	P1P2	CGN	CGN19785	Cucumis sativus var. sativus
CG3126	Cgn19825	Japan	P1P2	CGN	CGN19825	Cucumis sativus var. sativus
CG3127	Cgn19828	Japan	P1P2	CGN	CGN19828	Cucumis sativus var. sativus
CG3128	Ochiai Early	Japan	P1P2	CGN	CGN20866	Cucumis sativus var. sativus
CG3129	Long Green	Japan	P1P2	CGN	CGN20900	Cucumis sativus var. sativus
CG3130	Sagami	Japan	P1P2	CGN	CGN23403	Cucumis sativus var. sativus
CG3131	Takii'S Model	Japan	P1P2	IVF-CAAS	Ⅱ5A1426	Cucumis sativus var. sativus
CG3132	Ban Bai Di Zhe	Korea	P1P2	IVF-CAAS	Ⅱ5A1514	Cucumis sativus var. sativus
CG3133	No. 17533	Korea, South Shogoin	P1P2	NPGS	PI 220860	Cucumis sativus var. sativus
CG3134	Kariha	Japan	P1P2	NPGS	PI 504813	Cucumis sativus var. sativus
CG3135	Chang Pan	Japan	P1P3	IVF-CAAS	Ⅱ5A1016	Cucumis sativus var. sativus
CG3136	Natuhusunari	Japan	P1P3	NPGS	PI 374694	Cucumis sativus var. sativus
CG3137	Yaenari Ochiai	Japan	P2	CGN	CGN20206	Cucumis sativus var. sativus
CG3138	VIR 1182	Japan	P2	CGN	CGN20822	Cucumis sativus var. sativus
CG3139	Yamato Sanjaku Kyuri	Japan	P2	CGN	CGN20855	Cucumis sativus var. sativus
CG3140	Jakota Kohai Fushinari	Japan	P2	CGN	CGN20887	Cucumis sativus var. sativus
CG3141	VIR 1180	Japan	P2	CGN	CGN21682	Cucumis sativus var. sativus
CG3142	Koshiro	Japan	P2	NPGS	PI 390250	Cucumis sativus var. sativus
CG3143	185	Japan	P1	IVF-CAAS	NA	Cucumis sativus var. sativus
CG4000	Chinese Cucumber	China, Hong Kong	P1	NPGS	PI 267743	Cucumis sativus var. sativus
CG4001	PI 419214	China, Hong Kong	P1	NPGS	PI 419214	Cucumis sativus var. sativus
CG4002	Taichung Mou Gua	China, Taiwan	P1	NPGS	PI 321011	Cucumis sativus var. sativus
CG4003	Fengyuan Green Skin	China, Taiwan	P1	CGN	CGN19615	Cucumis sativus var. sativus
CG4004	Improved Green Skin	China, Taiwan	P1	CGN	CGN19616	Cucumis sativus var. sativus
CG4005	Nanchi White Spine	China, Taiwan	P1	CGN	CGN19618	Cucumis sativus var. sativus
CG4006	Nei Wu	China, Taiwan	P1	CGN	CGN19619	Cucumis sativus var. sativus
CG4007	Taichung Mou Gua	China, Taiwan	P1	CGN	CGN21596	Cucumis sativus var. sativus
CG4008	Lv Bao Huang Gua	China, Taiwan	P1	IVF-CAAS	Ⅱ5A1020	Cucumis sativus var. sativus
CG4009	Gaofeng 8 Hao	China, Taiwan	P1	IVF-CAAS	Ⅱ5A1383	Cucumis sativus var. sativus
CG4010	Wu Ci Huang Gua	China, Taiwan	P1	IVF-CAAS	Ⅱ5A1475	Cucumis sativus var. sativus
CG4011	Taipei No. 2Hybrid	China, Taiwan	P1	NPGS	PI 302443	Cucumis sativus var. sativus
CG4012	Fengyuan Green Skin	China, Taiwan	P1	NPGS	PI 321006	Cucumis sativus var. sativus
CG4013	Improved Green Skin	China, Taiwan	P1	NPGS	PI 321007	Cucumis sativus var. sativus
CG4014	Nanchi White Spine	China, Taiwan	P1	NPGS	PI 321009	Cucumis sativus var. sativus
CG4015	Nei Wu	China, Taiwan	P1	NPGS	PI 321010	Cucumis sativus var. sativus
CG4016	Hei Pei Takua	China, Taiwan	P1	NPGS	PI 511817	Cucumis sativus var. sativus
CG4017	Woon Nong No.5	China, Taiwan	P1	NPGS	PI 511818	Cucumis sativus var. sativus
CG4018	205 Cucumber	China, Taiwan	P1	NPGS	PI 511819	Cucumis sativus var. sativus
CG4019	Za Jiao Huang Gua	China, Yunnan	P1	IVF-CAAS	Ⅱ5A1193	Cucumis sativus var. sativus
CG4020	Huang Gua	China, Yunnan	P1	IVF-CAAS	Ⅱ5A1397	Cucumis sativus var. sativus
CG4021	Lan Cang Huang Gua	China, Yunnan	P1	IVF-CAAS	Ⅱ5A0979	Cucumis sativus var. sativus
CG4022	Huang You Tiao	China, Yunnan	P1	IVF-CAAS	Ⅱ5A0980	Cucumis sativus var. sativus
CG4023	Cheng Hai Zao	China, Yunnan	P1	IVF-CAAS	Ⅱ5A1313	Cucumis sativus var. sativus
CG4024	Cheng Hai Zao Huang Gua	China, Yunnan	P1	IVF-CAAS	Ⅱ5A0464	Cucumis sativus var. sativus
CG4025	Huang Gua	China, Yunnan	P1	IVF-CAAS	Ⅱ5A1323	Cucumis sativus var. sativus
CG4026	Ben Di Bai Pi Huang Gua	China, Yunnan	P1	IVF-CAAS	Ⅱ5A1312	Cucumis sativus var. sativus
CG4027	Ben Di Huang Gua	China, Yunnan	P1	IVF-CAAS	Ⅱ5A1326	Cucumis sativus var. sativus
CG4028	San Jiang Kou Huang Gua	China, Jiangxi	P1	IVF-CAAS	Ⅱ5A1063	Cucumis sativus var. sativus
CG4029	Lv Bao	China, Taiwan	P1	IVF-CAAS	Ⅱ5A1019	Cucumis sativus var. sativus
CG4030	Huang Gua	China, Sichuan	P1	IVF-CAAS	Ⅱ5A1072	Cucumis sativus var. sativus
CG4031	San Ye Zao	China, Sichuan	P1	IVF-CAAS	Ⅱ5A1073	Cucumis sativus var. sativus
CG4032	Bai Tiao Huan Gua	China, Sichuan	P1	IVF-CAAS	Ⅱ5A1074	Cucumis sativus var. sativus
CG4033	Qing Huang Gua	China, Sichuan	P1	IVF-CAAS	Ⅱ5A0923	Cucumis sativus var. sativus
CG4034	Si Gua Qing	China, Sichuan	P1	IVF-CAAS	Ⅱ5A0961	Cucumis sativus var. sativus
CG4035	Da Huang Gua Zi	China, Sichuan	P1	IVF-CAAS	Ⅱ5A0981	Cucumis sativus var. sativus
CG4036	Bai Huang Gua	China, Sichuan	P1	IVF-CAAS	Ⅱ5A0984	Cucumis sativus var. sativus
CG4037	Wu Bang Huang Gua	China, Sichuan	P1	IVF-CAAS	Ⅱ5A0986	Cucumis sativus var. sativus
CG4038	Wan Yuan Huang Gua	China, Sichuan	P1	IVF-CAAS	Ⅱ5A0376	Cucumis sativus var. sativus
CG4039	Chang Huang Gua	China, Sichuan	P1	IVF-CAAS	Ⅱ5A0393	Cucumis sativus var. sativus
CG4040	Cun Jin Hang Gua	China, Sichuan	P1	IVF-CAAS	Ⅱ5A1328	Cucumis sativus var. sativus
CG4041	Da Ci Huang Gua	China, Sichuan	P1	IVF-CAAS	Ⅱ5A0386	Cucumis sativus var. sativus
CG4042	Bai Pi Huang Gua	China, Sichuan	P1	IVF-CAAS	Ⅱ5A0394	Cucumis sativus var. sativus
CG4043	Qing Huang Gua	China, Sichuan	P1	IVF-CAAS	Ⅱ5A0388	Cucumis sativus var. sativus
CG4044	Xiao Huang Gua	China, Sichuan	P1	IVF-CAAS	Ⅱ5A0378	Cucumis sativus var. sativus
CG4045	Qing Pi Huan Gua	China, Sichuan	P1	IVF-CAAS	Ⅱ5A0389	Cucumis sativus var. sativus
CG4046	Da Bai Huang Gua	China, Sichuan	P1	IVF-CAAS	Ⅱ5A1211	Cucumis sativus var. sativus
CG4047	Shan Huang Gua	China, Sichuan	P1	IVF-CAAS	Ⅱ5A1428	Cucumis sativus var. sativus
CG4048	Da Huang Gua	China, Sichuan	P1	IVF-CAAS	Ⅱ5A0379	Cucumis sativus var. sativus
CG4049	Zi Huang Gua	China, Sichuan	P1	IVF-CAAS	Ⅱ5A0380	Cucumis sativus var. sativus
CG4050	Bai Huang Gua	China, Sichuan	P1	IVF-CAAS	Ⅱ5A1210	Cucumis sativus var. sativus
CG4051	Zao Zi Huang Gua	China, Sichuan	P1	IVF-CAAS	Ⅱ5A0209	Cucumis sativus var. sativus
CG4052	Luo Dai Zhen Haung Gua	China, Sichuan	P1	IVF-CAAS	Ⅱ5A0457	Cucumis sativus var. sativus
CG4053	Hei Wu She	China, Sichuan	P1	IVF-CAAS	Ⅱ5A1059	Cucumis sativus var. sativus
CG4054	Huang Bai Huang Gua	China, Sichuan	P1	IVF-CAAS	Ⅱ5A0397	Cucumis sativus var. sativus
CG4055	Cun Jin Hang Gua	China, Sichuan	P1	IVF-CAAS	Ⅱ5A0374	Cucumis sativus var. sativus
CG4056	Da Bai Huang Gua	China, Sichuan	P1	IVF-CAAS	Ⅱ5A0370	Cucumis sativus var. sativus
CG4057	Bai Huang Gua	China, Sichuan	P1	IVF-CAAS	Ⅱ5A0373	Cucumis sativus var. sativus
CG4058	Er Zao Zi Huang Gua	China, Sichuan	P1	IVF-CAAS	Ⅱ5A0387	Cucumis sativus var. sativus
CG4059	Pi Xian Huang Gua	China, Sichuan	P1	IVF-CAAS	Ⅱ5A0391	Cucumis sativus var. sativus
CG4060	Da Bai Gua	China, Sichuan	P1	IVF-CAAS	Ⅱ5A0371	Cucumis sativus var. sativus
CG4061	Bai Pi Huang Gua	China, Sichuan	P1	IVF-CAAS	Ⅱ5A0384	Cucumis sativus var. sativus
CG4062	Peng Jia Huang Gua	China, Sichuan	P1	IVF-CAAS	Ⅱ5A0390	Cucumis sativus var. sativus
CG4063	Er Tiao Qing	China, Anhui	P1	IVF-CAAS	Ⅱ5A0899	Cucumis sativus var. sativus
CG4064	Jia Shan Qing Pi Huang Gua	China, Anhui	P1	IVF-CAAS	Ⅱ5A0759	Cucumis sativus var. sativus
CG4065	Jia Shan Bai Pi Huang Gua	China, Anhui	P1	IVF-CAAS	Ⅱ5A0760	Cucumis sativus var. sativus
CG4066	Xia Qiu Huang Gua	China, Anhui	P1	IVF-CAAS	Ⅱ5A1054	Cucumis sativus var. sativus
CG4067	Shou Xian Zao Huang Gua	China, Anhui	P1	IVF-CAAS	Ⅱ5A0038	Cucumis sativus var. sativus
CG4068	Yue Xi Huang Gua	China, Anhui	P1	IVF-CAAS	Ⅱ5A1341	Cucumis sativus var. sativus
CG4069	Hei You Pi Zao Huang Gua	China, Anhui	P1	IVF-CAAS	Ⅱ5A0854	Cucumis sativus var. sativus
CG4070	Wang Jiang Zao Huang Gua	China, Anhui	P1	IVF-CAAS	Ⅱ5A1342	Cucumis sativus var. sativus
CG4071	Qing Pi Zao Huang Gua	China, Anhui	P1	IVF-CAAS	Ⅱ5A0827	Cucumis sativus var. sativus
CG4072	Ling Bi Huang Gua	China, Anhui	P1	IVF-CAAS	Ⅱ5A1340	Cucumis sativus var. sativus
CG4073	You Pi Huang Gua	China, Anhui	P1	IVF-CAAS	Ⅱ5A0022	Cucumis sativus var. sativus
CG4074	Meng Cheng Qiu Huang Gua	China, Anhui	P1	IVF-CAAS	Ⅱ5A1099	Cucumis sativus var. sativus
CG4075	Yan Zi He Zao Huang Gua	China, Anhui	P1	IVF-CAAS	Ⅱ5A1339	Cucumis sativus var. sativus
CG4076	He Kou Zao Huang Gua	China, Anhui	P1	IVF-CAAS	Ⅱ5A1119	Cucumis sativus var. sativus
CG4077	Huo Qiu Zao Huang Gua	China, Anhui	P1	IVF-CAAS	Ⅱ5A1430	Cucumis sativus var. sativus
CG4078	Huo Qiu Zao Huang Gua	China, Anhui	P1	IVF-CAAS	Ⅱ5A0241	Cucumis sativus var. sativus
CG4079	Ben Di Qing Gua	China, Guangdong	P1	IVF-CAAS	Ⅱ5A1083	Cucumis sativus var. sativus
CG4080	Sui Qing 1 Hao	China, Guangdong	P1	IVF-CAAS	Ⅱ5A1134	Cucumis sativus var. sativus
CG4081	Qiu Huang Gua	China, Guangdong	P1	IVF-CAAS	Ⅱ5A1135	Cucumis sativus var. sativus
CG4082	Wu Chuan Huang Gua	China, Guangdong	P1	IVF-CAAS	Ⅱ5A0698	Cucumis sativus var. sativus
CG4083	Bian Peng Qing(Bai Ci)	China, Guangdong	P1	IVF-CAAS	Ⅱ5A0879	Cucumis sativus var. sativus
CG4084	Jia Huang Gua	China, Guangdong	P1	IVF-CAAS	Ⅱ5A0932	Cucumis sativus var. sativus
CG4085	Xia Qing Er Hao	China, Guangdong	P1	IVF-CAAS	Ⅱ5A1064	Cucumis sativus var. sativus
CG4086	Xin Wan Ji Huang Gua	China, Guangdong	P1	IVF-CAAS	Ⅱ5A1419	Cucumis sativus var. sativus
CG4087	Long Dong Xue Qing	China, Guangdong	P1	IVF-CAAS	Ⅱ5A0289	Cucumis sativus var. sativus
CG4088	Jiao Xin	China, Guangdong	P1	IVF-CAAS	Ⅱ5A0291	Cucumis sativus var. sativus
CG4089	Shan Tou Da Qing	China, Guangdong	P1	IVF-CAAS	Ⅱ5A0444	Cucumis sativus var. sativus
CG4090	Huang Shan Tou	China, Guangdong	P1	IVF-CAAS	Ⅱ5A0221	Cucumis sativus var. sativus
CG4091	Shan Tou Da Diao Gua(Hei Ci)	China, Guangdong	P1	IVF-CAAS	Ⅱ5A1017	Cucumis sativus var. sativus
CG4092	Shan Tou Da Diao Gua(Bai Ci)	China, Guangdong	P1	IVF-CAAS	Ⅱ5A1018	Cucumis sativus var. sativus
CG4093	Zhang Huang Huang Gua	China, Guangdong	P1	IVF-CAAS	Ⅱ5A1002	Cucumis sativus var. sativus
CG4094	Quan Qing	China, Guangdong	P1	IVF-CAAS	Ⅱ5A0285	Cucumis sativus var. sativus
CG4095	Jin Shan Huang Gua	China, Guangdong	P1	IVF-CAAS	Ⅱ5A1170	Cucumis sativus var. sativus
CG4096	Zhang Wang Huang Gua	China, Guangdong	P1	IVF-CAAS	Ⅱ5A1243	Cucumis sativus var. sativus
CG4097	Yue Zao 75	China, Guangdong	P1	IVF-CAAS	Ⅱ5A0223	Cucumis sativus var. sativus
CG4098	Sui Qing	China, Guangdong	P1	IVF-CAAS	Ⅱ5A0225	Cucumis sativus var. sativus
CG4099	Ning Qing	China, Guangdong	P1	IVF-CAAS	Ⅱ5A0281	Cucumis sativus var. sativus
CG4100	Yue Zao 82	China, Guangdong	P1	IVF-CAAS	Ⅱ5A0284	Cucumis sativus var. sativus
CG4101	Xia Qing San Hao	China, Guangdong	P1	IVF-CAAS	Ⅱ5A0295	Cucumis sativus var. sativus
CG4102	Xia Qiu Qing Gua	China, Guangdong	P1	IVF-CAAS	Ⅱ5A0637	Cucumis sativus var. sativus
CG4103	Huang Lang	China, Guangdong	P1	IVF-CAAS	Ⅱ5A0224	Cucumis sativus var. sativus
CG4104	Xia Qiu Si Feng	China, Guangdong	P1	IVF-CAAS	Ⅱ5A1023	Cucumis sativus var. sativus
CG4105	Huang Gua	China, Guangxi	P1	IVF-CAAS	Ⅱ5A1132	Cucumis sativus var. sativus
CG4106	Huang Gua	China, Guangxi	P1	IVF-CAAS	Ⅱ5A1329	Cucumis sativus var. sativus
CG4107	Bai Pi Huang Gua	China, Guangxi	P1	IVF-CAAS	Ⅱ5A1208	Cucumis sativus var. sativus
CG4108	Qing Yu Dan(Hei Ci)	China, Wuhan	P1	IVF-CAAS	Ⅱ5A1014	Cucumis sativus var. sativus
CG4109	Bai Shui(Hei Ci)	China, Wuhan	P1	IVF-CAAS	Ⅱ5A1015	Cucumis sativus var. sativus
CG4110	Ping Xiang Huang Gua	China, Jiangxi	P1	IVF-CAAS	Ⅱ5A1128	Cucumis sativus var. sativus
CG4111	Xian Huang Gua	China, Jiangxi	P1	IVF-CAAS	Ⅱ5A0677	Cucumis sativus var. sativus
CG4112	Ru Bai Huang Gua	China, Jiangxi	P1	IVF-CAAS	Ⅱ5A0933	Cucumis sativus var. sativus
CG4113	Shang Rao Huang Gua	China, Jiangxi	P1	IVF-CAAS	Ⅱ5A0937	Cucumis sativus var. sativus
CG4114	Su Chang	China, Jiangxi	P1	IVF-CAAS	Ⅱ5A0940	Cucumis sativus var. sativus
CG4115	Jiu Jiang Huang Gua	China, Jiangxi	P1	IVF-CAAS	Ⅱ5A0958	Cucumis sativus var. sativus
CG4116	San Jiang Kou Huang Gua	China, Jiangxi	P1	IVF-CAAS	Ⅱ5A0971	Cucumis sativus var. sativus
CG4117	Shui Dong Huang Gua	China, Jiangxi	P1	IVF-CAAS	Ⅱ5A0485	Cucumis sativus var. sativus
CG4118	An Yi Zao Huang Gua	China, Jiangxi	P1	IVF-CAAS	Ⅱ5A0972	Cucumis sativus var. sativus
CG4119	Yi Feng Zao Huang Gua	China, Jiangxi	P1	IVF-CAAS	Ⅱ5A0704	Cucumis sativus var. sativus
CG4120	Shang Li Huang Gua	China, Jiangxi	P1	IVF-CAAS	Ⅱ5A0069	Cucumis sativus var. sativus
CG4121	Gui Xi Bai Pi Huang Gua	China, Jiangxi	P1	IVF-CAAS	Ⅱ5A0821	Cucumis sativus var. sativus
CG4122	Long Quan Qing Huang Gua	China, Hubei	P1	IVF-CAAS	Ⅱ5A1011	Cucumis sativus var. sativus
CG4123	Duan Huang Gua	China, Hubei	P1	IVF-CAAS	Ⅱ5A1133	Cucumis sativus var. sativus
CG4124	Huang Gua	China, Hubei	P1	IVF-CAAS	Ⅱ5A1257	Cucumis sativus var. sativus
CG4125	Ci Huang Gua	China, Hubei	P1	IVF-CAAS	Ⅱ5A1258	Cucumis sativus var. sativus
CG4126	Bang Chui Gua	China, Hubei	P1	IVF-CAAS	Ⅱ5A1259	Cucumis sativus var. sativus
CG4127	Qing Yu Dan	China, Hubei	P1	IVF-CAAS	Ⅱ5A0974	Cucumis sativus var. sativus
CG4128	Shui Huang Gua	China, Hubei	P1	IVF-CAAS	Ⅱ5A1291	Cucumis sativus var. sativus
CG4129	Shan Huang Gua	China, Hubei	P1	IVF-CAAS	Ⅱ5A1292	Cucumis sativus var. sativus
CG4130	Han Huang Gua	China, Hubei	P1	IVF-CAAS	Ⅱ5A1293	Cucumis sativus var. sativus
CG4131	Guan Dou Huang Gua	China, Hubei	P1	IVF-CAAS	Ⅱ5A1294	Cucumis sativus var. sativus
CG4132	Han Huang Gua	China, Hubei	P1	IVF-CAAS	Ⅱ5A1400	Cucumis sativus var. sativus
CG4133	Shuai Huang Gua	China, Hubei	P1	IVF-CAAS	Ⅱ5A1401	Cucumis sativus var. sativus
CG4134	Shan Huang Gua	China, Hubei	P1	IVF-CAAS	Ⅱ5A1403	Cucumis sativus var. sativus
CG4135	Han Huang Gua	China, Hubei	P1	IVF-CAAS	Ⅱ5A1335	Cucumis sativus var. sativus
CG4136	Bai Huang Gua	China, Hubei	P1	IVF-CAAS	Ⅱ5A1337	Cucumis sativus var. sativus
CG4137	Han Huang Gua	China, Hubei	P1	IVF-CAAS	Ⅱ5A1338	Cucumis sativus var. sativus
CG4138	Shan Huang Gua	China, Hubei	P1	IVF-CAAS	Ⅱ5A1399	Cucumis sativus var. sativus
CG4139	Qing Yu Dan Huang Gua	China, Hubei	P1	IVF-CAAS	Ⅱ5A0239	Cucumis sativus var. sativus
CG4140	Yi Chuan Lian Huang Gua	China, Hubei	P1	IVF-CAAS	Ⅱ5A0240	Cucumis sativus var. sativus
CG4141	Liao Gua	China, Hubei	P1	IVF-CAAS	Ⅱ5A0427	Cucumis sativus var. sativus
CG4142	Wu Han Qiu Gua	China, Hubei	P1	IVF-CAAS	Ⅱ5A0435	Cucumis sativus var. sativus
CG4143	Bai Huang Gua	China, Hubei	P1	IVF-CAAS	Ⅱ5A0433	Cucumis sativus var. sativus
CG4144	Han Huang Gua	China, Hubei	P1	IVF-CAAS	Ⅱ5A1280	Cucumis sativus var. sativus
CG4145	Shan Huang Gua	China, Hubei	P1	IVF-CAAS	Ⅱ5A1281	Cucumis sativus var. sativus
CG4146	Han Huang Gua	China, Hubei	P1	IVF-CAAS	Ⅱ5A1282	Cucumis sativus var. sativus
CG4147	Han Huang Gua	China, Hubei	P1	IVF-CAAS	Ⅱ5A1289	Cucumis sativus var. sativus
CG4148	Han Huang Gua	China, Hubei	P1	IVF-CAAS	Ⅱ5A1290	Cucumis sativus var. sativus
CG4149	Han Huang Gua	China, Hubei	P1	IVF-CAAS	Ⅱ5A1333	Cucumis sativus var. sativus
CG4150	Han Huang Gua	China, Hubei	P1	IVF-CAAS	Ⅱ5A1334	Cucumis sativus var. sativus
CG4151	Ban Cang Huang Gua	China, Hubei	P1	IVF-CAAS	Ⅱ5A1336	Cucumis sativus var. sativus
CG4152	Shan Huang Gua	China, Hubei	P1	IVF-CAAS	Ⅱ5A1402	Cucumis sativus var. sativus
CG4153	Huang Pi Huang Gua	China, Hubei	P1	IVF-CAAS	Ⅱ5A1283	Cucumis sativus var. sativus
CG4154	Liu Lin Huang Gua	China, Hubei	P1	IVF-CAAS	Ⅱ5A1284	Cucumis sativus var. sativus
CG4155	Bai Sha Huang Gua	China, Hubei	P1	IVF-CAAS	Ⅱ5A1285	Cucumis sativus var. sativus
CG4156	Bang Chui Huang Gua	China, Hubei	P1	IVF-CAAS	Ⅱ5A1287	Cucumis sativus var. sativus
CG4157	Feng Xi Huang Gua	China, Hubei	P1	IVF-CAAS	Ⅱ5A1288	Cucumis sativus var. sativus
CG4158	Bai Huang Gua Yi Hao	China, Hubei	P1	IVF-CAAS	Ⅱ5A1493	Cucumis sativus var. sativus
CG4159	Bai Huang Gua Er Hao	China, Hubei	P1	IVF-CAAS	Ⅱ5A1494	Cucumis sativus var. sativus
CG4160	Yi Chuanlian	China, Hubei	P1	IVF-CAAS	Ⅱ5A1062	Cucumis sativus var. sativus
CG4161	Huang Gua	China, Hunan	P1	IVF-CAAS	Ⅱ5A1137	Cucumis sativus var. sativus
CG4162	Lin Xiang Zao Huang Gua	China, Hunan	P1	IVF-CAAS	Ⅱ5A0042	Cucumis sativus var. sativus
CG4163	Feng Huang Zao Huang Gua	China, Hunan	P1	IVF-CAAS	Ⅱ5A0265	Cucumis sativus var. sativus
CG4164	Bai Huang Gua	China, Hunan	P1	IVF-CAAS	Ⅱ5A0268	Cucumis sativus var. sativus
CG4165	Xin Qiang Huang Gua	China, Hunan	P1	IVF-CAAS	Ⅱ5A0060	Cucumis sativus var. sativus
CG4166	Yi Wo Feng Hang Gua	China, Hunan	P1	IVF-CAAS	Ⅱ5A0263	Cucumis sativus var. sativus
CG4167	Bai Pi Huang Gua	China, Hunan	P1	IVF-CAAS	Ⅱ5A0264	Cucumis sativus var. sativus
CG4168	Chun Huang Gua	China, Hunan	P1	IVF-CAAS	Ⅱ5A1492	Cucumis sativus var. sativus
CG4169	Zhu Zhou Bai Huang Gua	China, Hunan	P1	IVF-CAAS	Ⅱ5A0041	Cucumis sativus var. sativus
CG4170	Bai Huang Gua	China, Hunan	P1	IVF-CAAS	Ⅱ5A0053	Cucumis sativus var. sativus
CG4171	Han Shou Huang Gua	China, Hunan	P1	IVF-CAAS	Ⅱ5A0269	Cucumis sativus var. sativus
CG4172	Yuan Jang Huang Gua	China, Hunan	P1	IVF-CAAS	Ⅱ5A0065	Cucumis sativus var. sativus
CG4173	Da Shi Qiao Zao Huang Gua	China, Hunan	P1	IVF-CAAS	Ⅱ5A0045	Cucumis sativus var. sativus
CG4174	Zao Bai Huang Gua	China, Hunan	P1	IVF-CAAS	Ⅱ5A0260	Cucumis sativus var. sativus
CG4175	Lan Tian Zao Huang Gua	China, Hunan	P1	IVF-CAAS	Ⅱ5A0054	Cucumis sativus var. sativus
CG4176	Tang Shan Qing Ci	China, Hunan	P1	IVF-CAAS	Ⅱ5A0272	Cucumis sativus var. sativus
CG4177	Yi Yang Zao Huang Gua	China, Hunan	P1	IVF-CAAS	Ⅱ5A0046	Cucumis sativus var. sativus
CG4178	Wa Shi Ji Zao Huang Gua	China, Hunan	P1	IVF-CAAS	Ⅱ5A0992	Cucumis sativus var. sativus
CG4179	Rou Huang Gua	China, Hunan	P1	IVF-CAAS	Ⅱ5A0052	Cucumis sativus var. sativus
CG4180	Huang Cha Ling Shui Huang Gua	China, Hunan	P1	IVF-CAAS	Ⅱ5A0050	Cucumis sativus var. sativus
CG4181	Tai Wan Huang Gua	China, Hunan	P1	IVF-CAAS	Ⅱ5A0051	Cucumis sativus var. sativus
CG4182	Leng Lu Huang Gua	China, Hunan	P1	IVF-CAAS	Ⅱ5A0061	Cucumis sativus var. sativus
CG4183	Pu Kou Bai Huang Gua	China, Hunan	P1	IVF-CAAS	Ⅱ5A0261	Cucumis sativus var. sativus
CG4184	Fu An Zao Huang Gua	China, Hunan	P1	IVF-CAAS	Ⅱ5A0040	Cucumis sativus var. sativus
CG4185	Chang Sha Ci Gua	China, Hunan	P1	IVF-CAAS	Ⅱ5A0459	Cucumis sativus var. sativus
CG4186	Lang Li Zao	China, Hunan	P1	IVF-CAAS	Ⅱ5A0058	Cucumis sativus var. sativus
CG4187	Han Huang Gua	China, Fujian	P1	IVF-CAAS	Ⅱ5A0896	Cucumis sativus var. sativus
CG4188	Yan Ping Huang Gua	China, Fujian	P1	IVF-CAAS	Ⅱ5A0557	Cucumis sativus var. sativus
CG4189	You Xi Qing Pi Huang Gua	China, Fujian	P1	IVF-CAAS	Ⅱ5A1114	Cucumis sativus var. sativus
CG4190	You Xi Lao Shu Gua	China, Fujian	P1	IVF-CAAS	Ⅱ5A0549	Cucumis sativus var. sativus
CG4191	You Xi Qing Pi Lao Shu Gua	China, Fujian	P1	IVF-CAAS	Ⅱ5A0550	Cucumis sativus var. sativus
CG4192	Yong Ding Qing Huang Gua	China, Fujian	P1	IVF-CAAS	Ⅱ5A0554	Cucumis sativus var. sativus
CG4193	Yong Ding Ben Di Huang Gua	China, Fujian	P1	IVF-CAAS	Ⅱ5A0555	Cucumis sativus var. sativus
CG4194	Yong Ding Qing Pi Huang Gua	China, Fujian	P1	IVF-CAAS	Ⅱ5A0556	Cucumis sativus var. sativus
CG4195	Sha Xian Xia Mao Huang Gua	China, Fujian	P1	IVF-CAAS	Ⅱ5A0548	Cucumis sativus var. sativus
CG4196	Lian Jiang Huang Gua	China, Fujian	P1	IVF-CAAS	Ⅱ5A0826	Cucumis sativus var. sativus
CG4197	Xia Pu Huang Gua	China, Fujian	P1	IVF-CAAS	Ⅱ5A1115	Cucumis sativus var. sativus
CG4198	Yun Guan Qing Pi Huang Gua	China, Guangxi	P1	IVF-CAAS	Ⅱ5A1411	Cucumis sativus var. sativus
CG4199	Ci Huang Gua	China, Guangxi	P1	IVF-CAAS	Ⅱ5A0889	Cucumis sativus var. sativus
CG4200	Chang Xing Qing Pi Huang Gua	China, Guangxi	P1	IVF-CAAS	Ⅱ5A0300	Cucumis sativus var. sativus
CG4201	Zao Huang Gua	China, Guangxi	P1	IVF-CAAS	Ⅱ5A0858	Cucumis sativus var. sativus
CG4202	Na Yong Huang Gua	China, Guangxi	P1	IVF-CAAS	Ⅱ5A0301	Cucumis sativus var. sativus
CG4203	Gui Yang Jia Huang Gua	China, Guangxi	P1	IVF-CAAS	Ⅱ5A0441	Cucumis sativus var. sativus
CG4204	Tong Ren Ben Di Huang Gua	China, Guangxi	P1	IVF-CAAS	Ⅱ5A0991	Cucumis sativus var. sativus
CG4205	Li Ping Ben Di Huang Gua	China, Guangxi	P1	IVF-CAAS	Ⅱ5A0856	Cucumis sativus var. sativus
CG4206	98 Hao Huang Gua	China, Chongqing	P1	IVF-CAAS	Ⅱ5A1477	Cucumis sativus var. sativus
CG4207	5A25 Huang Gua	China, Chongqing	P1	IVF-CAAS	Ⅱ5A1478	Cucumis sativus var. sativus
CG4208	64 Hao Huang Gua	China, Chongqing	P1	IVF-CAAS	Ⅱ5A1479	Cucumis sativus var. sativus
CG4209	115 Hao Huang Gua	China, Chongqing	P1	IVF-CAAS	Ⅱ5A1480	Cucumis sativus var. sativus
CG4210	71 Hao Huang Gua	China, Chongqing	P1	IVF-CAAS	Ⅱ5A1482	Cucumis sativus var. sativus
CG4211	Gang Qing	China, Hong Kong	P1	IVF-CAAS	Ⅱ5A0292	Cucumis sativus var. sativus
CG4212	GW79	NA	P1	IVF-CAAS	GW79	Cucumis sativus var. sativus
CG4213	Hong Kong N.T.	China, Hong Kong	P1P2	NPGS	PI 267742	Cucumis sativus var. sativus
CG4214	Gao Feng 6 Hao	China, Taiwan	P1P2	IVF-CAAS	Ⅱ5A1425	Cucumis sativus var. sativus
CG4215	Shan Huang Gua	China, Yunnan	P1P2	IVF-CAAS	Ⅱ5A1325	Cucumis sativus var. sativus
CG4216	Huang Gua	China, Yunnan	P1P2	IVF-CAAS	Ⅱ5A1110	Cucumis sativus var. sativus
CG4217	San Dao Yan Huang Gua	China, Sichuan	P1P2	IVF-CAAS	Ⅱ5A0461	Cucumis sativus var. sativus
CG4218	Bai Huang Gua	China, Anhui	P1P2	IVF-CAAS	Ⅱ5A1253	Cucumis sativus var. sativus
CG4219	Ye Er San Huang Gua	China, Anhui	P1P2	IVF-CAAS	Ⅱ5A1241	Cucumis sativus var. sativus
CG4220	Han Huang Gua	China, Hubei	P1P2	IVF-CAAS	Ⅱ5A1279	Cucumis sativus var. sativus
CG4221	Fen Yao Huang Gua(Bai Ci)	China, Fujian	P1P2	IVF-CAAS	Ⅱ5A0874	Cucumis sativus var. sativus
CG4222	Ben Di Huang Gua	China, Yunnan	P1P2	IVF-CAAS	Ⅱ5A1195	Cucumis sativus var. sativus
CG4223	Gui Ping Chi Shu Duan Huang Gua	China, Guangxi	P1P3	IVF-CAAS	Ⅱ5A1044	Cucumis sativus var. sativus
CG4224	Yan Men Zao Huang Gua	China, Hunan	P1P2	IVF-CAAS	Ⅱ5A0044	Cucumis sativus var. sativus
CG4225	Huang Gua	China, Guangxi	P1P2	IVF-CAAS	Ⅱ5A1261	Cucumis sativus var. sativus
CG4226	Ddw 382	China, Hong Kong	P3	NPGS	PI 512336	Cucumis sativus var. sativus
CG4227	Nanchi Black Spine	China, Taiwan	P1P3	NPGS	PI 321008	Cucumis sativus var. sativus
CG4228	206 Cucumber	China, Taiwan	P1P3	NPGS	PI 511820	Cucumis sativus var. sativus
CG4229	Qing Pi Wu Ci	China, Yunnan	P1P3	IVF-CAAS	Ⅱ5A1315	Cucumis sativus var. sativus
CG4230	Shan Huang Gua	China, Yunnan	P1P3	IVF-CAAS	Ⅱ5A1108	Cucumis sativus var. sativus
CG4231	Huang Gua	China, Yunnan	P1P3	IVF-CAAS	Ⅱ5A1320	Cucumis sativus var. sativus
CG4232	Ben Huang Gua X Jin Yan 1 Hao	China, Yunnan	P1P3	IVF-CAAS	Ⅱ5A1197	Cucumis sativus var. sativus
CG4233	Bei Jing Da Ci	China, Yunnan	P1P3	IVF-CAAS	Ⅱ5A1324	Cucumis sativus var. sativus
CG4234	Shan Huang Gua	China, Yunnan	P1P3	IVF-CAAS	Ⅱ5A1107	Cucumis sativus var. sativus
CG4235	Huang Gua	China, Yunnan	P1P3	IVF-CAAS	Ⅱ5A1321	Cucumis sativus var. sativus
CG4236	Shan Huang Gua	China, Yunnan	P1P3	IVF-CAAS	Ⅱ5A1431	Cucumis sativus var. sativus
CG4237	Huang Gua	China, Yunnan	P1P3	IVF-CAAS	Ⅱ5A0999	Cucumis sativus var. sativus
CG4238	Ben Di Huang Gua	China, Yunnan	P1P3	IVF-CAAS	Ⅱ5A1109	Cucumis sativus var. sativus
CG4239	Ben Di Huang Gua	China, Yunnan	P1P3	IVF-CAAS	Ⅱ5A1196	Cucumis sativus var. sativus
CG4240	Ben Di Huang Gua	China, Yunnan	P1P3	IVF-CAAS	Ⅱ5A1318	Cucumis sativus var. sativus
CG4241	Ben Di Huang Gua	China, Yunnan	P1P3	IVF-CAAS	Ⅱ5A1319	Cucumis sativus var. sativus
CG4242	Yuan Huang Gua	China, Yunnan	P1P3	IVF-CAAS	Ⅱ5A1314	Cucumis sativus var. sativus
CG4243	Pa Di Huang Gua	China, Yunnan	P1P3	IVF-CAAS	Ⅱ5A1316	Cucumis sativus var. sativus
CG4244	Shui Huang Gua	China, Yunnan	P1P3	IVF-CAAS	Ⅱ5A1194	Cucumis sativus var. sativus
CG4245	Ben Di Huang Gua	China, Yunnan	P1P3	IVF-CAAS	Ⅱ5A1322	Cucumis sativus var. sativus
CG4246	Huang Gua	China, Yunnan	P1P3	IVF-CAAS	Ⅱ5A1317	Cucumis sativus var. sativus
CG4247	Duan Zi Huang Gua	China, Sichuan	P1P3	IVF-CAAS	Ⅱ5A0213	Cucumis sativus var. sativus
CG4248	Xing Wen Huang Gua	China, Sichuan	P1P3	IVF-CAAS	Ⅱ5A0396	Cucumis sativus var. sativus
CG4249	Da Huang Gua	China, Sichuan	P1P3	IVF-CAAS	Ⅱ5A0377	Cucumis sativus var. sativus
CG4250	Pa Di Huang Gua	China, Sichuan	P1P3	IVF-CAAS	Ⅱ5A1209	Cucumis sativus var. sativus
CG4251	Da Zhu Zao Huang Gua	China, Sichuan	P1P3	IVF-CAAS	Ⅱ5A0368	Cucumis sativus var. sativus
CG4252	Da Huang Gua Zi	China, Sichuan	P1P3	IVF-CAAS	Ⅱ5A0214	Cucumis sativus var. sativus
CG4253	Xiao Huang Gua	China, Sichuan	P1P3	IVF-CAAS	Ⅱ5A0395	Cucumis sativus var. sativus
CG4254	Pa Di Huang Gua(Yi Bin Huang Gua)	China, Sichuan	P1P3	IVF-CAAS	Ⅱ5A0279	Cucumis sativus var. sativus
CG4255	Cun Jin Hang Gua	China, Sichuan	P1P3	IVF-CAAS	Ⅱ5A0828	Cucumis sativus var. sativus
CG4256	Wang Shui Huang Gua	China, Sichuan	P1P3	IVF-CAAS	Ⅱ5A0829	Cucumis sativus var. sativus
CG4257	Guang An Huang Gua	China, Sichuan	P1P3	IVF-CAAS	Ⅱ5A0375	Cucumis sativus var. sativus
CG4258	Qing Hua Pi Huang Gua	China, Sichuan	P1P3	IVF-CAAS	Ⅱ5A1117	Cucumis sativus var. sativus
CG4259	Qing Pa Di Huang Gua	China, Sichuan	P1P3	IVF-CAAS	Ⅱ5A1380	Cucumis sativus var. sativus
CG4260	Bai Si Tiao	China, Sichuan	P1P3	IVF-CAAS	Ⅱ5A0208	Cucumis sativus var. sativus
CG4261	Cun Jin Zi	China, Sichuan	P1P3	IVF-CAAS	Ⅱ5A0210	Cucumis sativus var. sativus
CG4262	Er Zao Zi	China, Sichuan	P1P3	IVF-CAAS	Ⅱ5A0211	Cucumis sativus var. sativus
CG4263	Dong Huang Gua	China, Sichuan	P1P3	IVF-CAAS	Ⅱ5A0217	Cucumis sativus var. sativus
CG4264	Da Bai Huang Gua	China, Sichuan	P1P3	IVF-CAAS	Ⅱ5A0399	Cucumis sativus var. sativus
CG4265	Er Zao Zi	China, Sichuan	P1P3	IVF-CAAS	Ⅱ5A0216	Cucumis sativus var. sativus
CG4266	Shan Shan Huang Gua	China, Sichuan	P1P3	IVF-CAAS	Ⅱ5A0830	Cucumis sativus var. sativus
CG4267	Bai Zi Huang Gua	China, Sichuan	P1P3	IVF-CAAS	Ⅱ5A0853	Cucumis sativus var. sativus
CG4268	Gun Di Huang Gua	China, Sichuan	P1P3	IVF-CAAS	Ⅱ5A0280	Cucumis sativus var. sativus
CG4269	Huang Pi Xiang Huang Gua	China, Sichuan	P1P3	IVF-CAAS	Ⅱ5A0398	Cucumis sativus var. sativus
CG4270	Mian Zhu Huang Gua	China, Sichuan	P1P3	IVF-CAAS	Ⅱ5A0212	Cucumis sativus var. sativus
CG4271	Qing Pi Huang Gua	China, Sichuan	P1P3	IVF-CAAS	Ⅱ5A0372	Cucumis sativus var. sativus
CG4272	Xian Huang Gua	China, Sichuan	P1P3	IVF-CAAS	Ⅱ5A0484	Cucumis sativus var. sativus
CG4273	Lang Zhong Huang Gua	China, Sichuan	P1P3	IVF-CAAS	Ⅱ5A0404	Cucumis sativus var. sativus
CG4274	Bai Pi Huang Gua	China, Anhui	P1P3	IVF-CAAS	Ⅱ5A1242	Cucumis sativus var. sativus
CG4275	Jin Zhai Wan Huang Gua	China, Anhui	P1P3	IVF-CAAS	Ⅱ5A1429	Cucumis sativus var. sativus
CG4276	Da Huang Gua	China, Guangdong	P1P3	IVF-CAAS	Ⅱ5A0638	Cucumis sativus var. sativus
CG4277	Lan Shi	China, Guangdong	P1P3	IVF-CAAS	Ⅱ5A0282	Cucumis sativus var. sativus
CG4278	Shan Ju Huang Gua	China, Guangdong	P1P3	IVF-CAAS	Ⅱ5A1112	Cucumis sativus var. sativus
CG4279	Er Qing	China, Guangdong	P1P3	IVF-CAAS	Ⅱ5A0222	Cucumis sativus var. sativus
CG4280	Jiang Men Da Qing	China, Guangdong	P1P3	IVF-CAAS	Ⅱ5A0226	Cucumis sativus var. sativus
CG4281	Da Ya Da Diao Gua	China, Guangdong	P1P3	IVF-CAAS	Ⅱ5A0286	Cucumis sativus var. sativus
CG4282	Huang Ge Qing	China, Guangdong	P1P3	IVF-CAAS	Ⅱ5A0288	Cucumis sativus var. sativus
CG4283	Shan Zui	China, Guangdong	P1P3	IVF-CAAS	Ⅱ5A0294	Cucumis sativus var. sativus
CG4284	Da Ya 8303	China, Guangdong	P1P3	IVF-CAAS	Ⅱ5A1065	Cucumis sativus var. sativus
CG4285	Cui Qing	China, Guangdong	P1P3	IVF-CAAS	Ⅱ5A0287	Cucumis sativus var. sativus
CG4286	Shao Guan Da Qing	China, Guangdong	P1P3	IVF-CAAS	Ⅱ5A0283	Cucumis sativus var. sativus
CG4287	Jin Shan Huang Gua	China, Guangdong	P1P3	IVF-CAAS	Ⅱ5A0706	Cucumis sativus var. sativus
CG4288	Zhang Huang Huang Gua	China, Guangxi	P1P3	IVF-CAAS	Ⅱ5A0259	Cucumis sativus var. sativus
CG4289	Huang Gua	China, Guangxi	P1P3	IVF-CAAS	Ⅱ5A1332	Cucumis sativus var. sativus
CG4290	Huang Gua	China, Guangxi	P1P3	IVF-CAAS	Ⅱ5A1330	Cucumis sativus var. sativus
CG4291	Gui Ping Zao Shu Duan Huang Gua	China, Guangxi	P1P3	IVF-CAAS	Ⅱ5A1043	Cucumis sativus var. sativus
CG4292	Gao Wang Zao Huang Gua	China, Guangxi	P1P3	IVF-CAAS	Ⅱ5A0037	Cucumis sativus var. sativus
CG4293	Bai Se Zao Huang Gua	China, Guangxi	P1P3	IVF-CAAS	Ⅱ5A0066	Cucumis sativus var. sativus
CG4294	La You Huang Gua	China, Guangxi	P1P3	IVF-CAAS	Ⅱ5A0819	Cucumis sativus var. sativus
CG4295	Huang Gua	China, Guangxi	P1P3	IVF-CAAS	Ⅱ5A1331	Cucumis sativus var. sativus
CG4296	Qing Pi Huang Gua	China, Jiangxi	P1P3	IVF-CAAS	Ⅱ5A0067	Cucumis sativus var. sativus
CG4297	Xin Gan Huang Gua	China, Jiangxi	P1P3	IVF-CAAS	Ⅱ5A0068	Cucumis sativus var. sativus
CG4298	Huang Gua	China, Hubei	P1P3	IVF-CAAS	Ⅱ5A1260	Cucumis sativus var. sativus
CG4299	Qing Pi Huang Gua	China, Hubei	P1P3	IVF-CAAS	Ⅱ5A1286	Cucumis sativus var. sativus
CG4300	Wu Yue Huang Gua	China, Hunan	P1P3	IVF-CAAS	Ⅱ5A0043	Cucumis sativus var. sativus
CG4301	Hu Qiao Huang Gua	China, Hunan	P1P3	IVF-CAAS	Ⅱ5A0055	Cucumis sativus var. sativus
CG4302	He Xi Huang Gua	China, Hunan	P1P3	IVF-CAAS	Ⅱ5A0064	Cucumis sativus var. sativus
CG4303	Ning Yuan Huang Gua	China, Hunan	P1P3	IVF-CAAS	Ⅱ5A0273	Cucumis sativus var. sativus
CG4304	Zao Huang Gua	China, Hunan	P1P3	IVF-CAAS	Ⅱ5A0270	Cucumis sativus var. sativus
CG4305	Huang Ba Cun	China, Hunan	P1P3	IVF-CAAS	Ⅱ5A0056	Cucumis sativus var. sativus
CG4306	Xin Tian Huang Gua	China, Hunan	P1P3	IVF-CAAS	Ⅱ5A0062	Cucumis sativus var. sativus
CG4307	Yuan Ling Huang Gua	China, Hunan	P1P3	IVF-CAAS	Ⅱ5A0262	Cucumis sativus var. sativus
CG4308	Lian Meng Zao Huang Gua	China, Hunan	P1P3	IVF-CAAS	Ⅱ5A0266	Cucumis sativus var. sativus
CG4309	Si Yue Huang Gua	China, Hunan	P1P3	IVF-CAAS	Ⅱ5A0276	Cucumis sativus var. sativus
CG4310	Heng Shan Huang Gua	China, Hunan	P1P3	IVF-CAAS	Ⅱ5A0047	Cucumis sativus var. sativus
CG4311	Tai Ping Zao Huang Gua	China, Hunan	P1P3	IVF-CAAS	Ⅱ5A0049	Cucumis sativus var. sativus
CG4312	Chang Qing	China, Hunan	P1P3	IVF-CAAS	Ⅱ5A0048	Cucumis sativus var. sativus
CG4313	Chang Sha Qing Ci	China, Hunan	P1P3	IVF-CAAS	Ⅱ5A0059	Cucumis sativus var. sativus
CG4314	Bai Huang Gua	China, Hunan	P1P3	IVF-CAAS	Ⅱ5A0057	Cucumis sativus var. sativus
CG4315	Xia Men Jiao Qu Cao Chun Huang Gua	China, Fujian	P1P3	IVF-CAAS	Ⅱ5A0824	Cucumis sativus var. sativus
CG4316	Zhang Zhou Zao Huang Gua	China, Fujian	P1P3	IVF-CAAS	Ⅱ5A0552	Cucumis sativus var. sativus
CG4317	Shao Wu Na Kou Huang Gua	China, Fujian	P1P3	IVF-CAAS	Ⅱ5A1045	Cucumis sativus var. sativus
CG4318	Long Yan Qing Pi Si Yue Gua	China, Fujian	P1P3	IVF-CAAS	Ⅱ5A0551	Cucumis sativus var. sativus
CG4319	Long Yan Qing Pi Si Yue Gua	China, Fujian	P1P3	IVF-CAAS	Ⅱ5A0825	Cucumis sativus var. sativus
CG4320	Wu Yue Huang Gua	China, Guangxi	P1P3	IVF-CAAS	Ⅱ5A1412	Cucumis sativus var. sativus
CG4321	Xi Shui Di Huang Gua	China, Guangxi	P1P3	IVF-CAAS	Ⅱ5A0307	Cucumis sativus var. sativus
CG4322	Qing Bai Pi Huang Gua	China, Guangxi	P1P3	IVF-CAAS	Ⅱ5A0860	Cucumis sativus var. sativus
CG4323	Kai Li Di Huang Gua	China, Guangxi	P1P3	IVF-CAAS	Ⅱ5A0304	Cucumis sativus var. sativus
CG4324	Wu Chuan Di Huang Gua	China, Guangxi	P1P3	IVF-CAAS	Ⅱ5A1297	Cucumis sativus var. sativus
CG4325	Tai Jiang Huang Gua	China, Guangxi	P1P3	IVF-CAAS	Ⅱ5A1295	Cucumis sativus var. sativus
CG4326	Song Tao Huang Gua	China, Guangxi	P1P3	IVF-CAAS	Ⅱ5A1298	Cucumis sativus var. sativus
CG4327	Tong Zi Ben Di Huang Gua(2)	China, Guangxi	P1P3	IVF-CAAS	Ⅱ5A0299	Cucumis sativus var. sativus
CG4328	Tong Zi Ben Di Huang Gua(1)	China, Guangxi	P1P3	IVF-CAAS	Ⅱ5A0303	Cucumis sativus var. sativus
CG4329	Qing Bai Pi Huang Gua	China, Guangxi	P1P3	IVF-CAAS	Ⅱ5A0306	Cucumis sativus var. sativus
CG4330	Zheng An Ben Di Huang Gua	China, Guangxi	P1P3	IVF-CAAS	Ⅱ5A0859	Cucumis sativus var. sativus
CG4331	Qing Zhen Huang Gua	China, Guangxi	P1P3	IVF-CAAS	Ⅱ5A0296	Cucumis sativus var. sativus
CG4332	Mei Tan Ben Di Huang Gua	China, Guangxi	P1P3	IVF-CAAS	Ⅱ5A0298	Cucumis sativus var. sativus
CG4333	Ben Di Zao Huang Gua	China, Guangxi	P1P3	IVF-CAAS	Ⅱ5A0861	Cucumis sativus var. sativus
CG4334	Ben Di Wan Huang Gua	China, Guangxi	P1P3	IVF-CAAS	Ⅱ5A0862	Cucumis sativus var. sativus
CG4335	Zao Huang Gua	China, Guangxi	P1P3	IVF-CAAS	Ⅱ5A0302	Cucumis sativus var. sativus
CG4336	Fu Quan Ben Di Huang Gua	China, Guangxi	P1P3	IVF-CAAS	Ⅱ5A0308	Cucumis sativus var. sativus
CG4337	Luo Dian Huang Gua	China, Guangxi	P1P3	IVF-CAAS	Ⅱ5A0705	Cucumis sativus var. sativus
CG4338	Zao Shu Huang Gua	China, Guangxi	P1P3	IVF-CAAS	Ⅱ5A0309	Cucumis sativus var. sativus
CG4339	Dao Zhen Ben Huang Gua	China, Guangxi	P1P3	IVF-CAAS	Ⅱ5A0305	Cucumis sativus var. sativus
CG4340	Zun Yi Ben Di Bai Huang Gua	China, Guangxi	P1P3	IVF-CAAS	Ⅱ5A1296	Cucumis sativus var. sativus
CG4341	Ben Di Huang Gua	China, Guangxi	P1P3	IVF-CAAS	Ⅱ5A0297	Cucumis sativus var. sativus
CG4342	Qing Pi Huang Gua	China, Guangxi	P1P3	IVF-CAAS	Ⅱ5A0310	Cucumis sativus var. sativus
CG4343	Zhen Yuan Ben Di Huang Gua	China, Guangxi	P1P3	IVF-CAAS	Ⅱ5A0857	Cucumis sativus var. sativus
CG4344	Zhen Yuan Di Huang Gua	China, Guangxi	P1P3	IVF-CAAS	Ⅱ5A0863	Cucumis sativus var. sativus
CG4345	5A39 Huang Gua	China, Chongqing	P1P3	IVF-CAAS	Ⅱ5A1481	Cucumis sativus var. sativus
CG4346	Chong Qing Huang Gua	China, Chongqing	P1P3	IVF-CAAS	Ⅱ5A1071	Cucumis sativus var. sativus
CG4347	G1792	NA	P1P3	IVF-CAAS	G1792	Cucumis sativus var. sativus
CG4348	Nanchi Black Spine	China, Taiwan	P2P3	CGN	CGN19617	Cucumis sativus var. sativus
CG4349	Jie Yang Qing Pi Da Diao Gua	China, Guangdong	P2P3	IVF-CAAS	Ⅱ5A0758	Cucumis sativus var. sativus
CG4350	Shan Di Huang Gua	China, Yunnan	P3	IVF-CAAS	Ⅱ5A0702	Cucumis sativus var. sativus
CG4351	Bai Qing Huang Gua	China, Sichuan	P3	IVF-CAAS	Ⅱ5A0215	Cucumis sativus var. sativus
CG4352	Xi Jiao Huang Gua	China, Fujian	P3	IVF-CAAS	Ⅱ5A1118	Cucumis sativus var. sativus
CG4353	Bai Ye San 04870	China	P1	IVF-CAAS	G6	Cucumis sativus var. sativus
CG4354	Ji Han	China, Jinlin	P1	IVF-CAAS	G17	Cucumis sativus var. sativus
CG4355	9110Gt	China	P1P2	IVF-CAAS	9110Gt	Cucumis sativus var. sativus
CG4356	3502	China	P1P2	IVF-CAAS	3502	Cucumis sativus var. sativus
CG4357	Chuan Bai	China, Sichuan	P1P2	IVF-CAAS	G13	Cucumis sativus var. sativus
CG4358	K2148	China	P1P3	IVF-CAAS	G14	Cucumis sativus var. sativus
CG4359	01 Yin 16	China	P1P3	IVF-CAAS	G15	Cucumis sativus var. sativus
CG4360	2004348	China	P1P2	IVF-CAAS	G16	Cucumis sativus var. sativus
CG5000	Gergano	Bulgaria	P1	NPGS	Ames 21761	Cucumis sativus var. sativus
CG5001	Lange Grune Volltragende	Denmark	P1	CGN	CGN21589	Cucumis sativus var. sativus
CG5002	Kaskad	Former Soviet Union	P1	NPGS	Ames 19223	Cucumis sativus var. sativus
CG5003	Vert Long Dechine	France	P1	NPGS	PI 264228	Cucumis sativus var. sativus
CG5004	Torpedo	Netherlands	P1	CGN	CGN19597	Cucumis sativus var. sativus
CG5005	Mr17+Pollinator	Netherlands	P1	CGN	CGN20867	Cucumis sativus var. sativus
CG5006	Ha Er Ke Fu Huang Gua	Russian Federation	P1	IVF-CAAS	Ⅱ5A1240	Cucumis sativus var. sativus
CG5007	Su Lian Huang Gua	Russian Federation	P1	IVF-CAAS	Ⅱ5A1263	Cucumis sativus var. sativus
CG5008	Mestnyi N471	Russian Federation	P1	CGN	CGN20927	Cucumis sativus var. sativus
CG5009	Dalnevostochny 6 (Dalnev	Russian Federation, Amur	P1	NPGS	PI 263046	Cucumis sativus var. sativus
CG5010	Mestnyi 467	Russian Federation, Primor	P1	NPGS	Ames 19224	Cucumis sativus var. sativus
CG5011	Vir 308	Turkey	P1	CGN	CGN20816	Cucumis sativus var. sativus
CG5012	Izinsjanskij Wezesnij	Union of Soviet Soc. Rep.	P1	CGN	CGN19550	Cucumis sativus var. sativus
CG5013	Vladivostokskii 155	Union of Soviet Soc. Rep.	P1	CGN	CGN19688	Cucumis sativus var. sativus
CG5014	E-C-Szan	Union of Soviet Soc. Rep.	P1	CGN	CGN20251	Cucumis sativus var. sativus
CG5015	Cus15/71	Albania	P1P2	CGN	CGN19775	Cucumis sativus var. sativus
CG5016	Danische Senf	Denmark	P1P2	CGN	CGN21588	Cucumis sativus var. sativus
CG5017	Langeland'S Riesen	Denmark	P1P2	CGN	CGN21590	Cucumis sativus var. sativus
CG5018	Mig	Former Soviet Union	P1P2	NPGS	Ames 19226	Cucumis sativus var. sativus
CG5019	Linija Gdp 14-3/1982	Former Soviet Union	P1P2	NPGS	Ames 19227	Cucumis sativus var. sativus
CG5020	Konkurent	Former Soviet Union	P1P2	NPGS	PI 435946	Cucumis sativus var. sativus
CG5021	A De Bo Ha Mi	France	P1P2	IVF-CAAS	Ⅱ5A0408	Cucumis sativus var. sativus
CG5022	Sensation	Germany	P1P2	CGN	CGN19637	Cucumis sativus var. sativus
CG5023	Japanische Klettergurke	Germany	P1P2	CGN	CGN19774	Cucumis sativus var. sativus
CG5024	Chinesische Schlangen	Germany	P1P2	CGN	CGN19777	Cucumis sativus var. sativus
CG5025	Kecskemeti Hamvas	Hungary	P1P2	CGN	CGN19628	Cucumis sativus var. sativus
CG5026	Budai Csemege	Hungary	P1P2	CGN	CGN20270	Cucumis sativus var. sativus
CG5027	Tiraspol'Sky 234 (Tirasp	Moldova	P1P2	NPGS	PI 263080	Cucumis sativus var. sativus
CG5028	Tiraspolski Rannii (234)	Moldova	P1P2	CGN	CGN23406	Cucumis sativus var. sativus
CG5029	Lange Groene	Netherlands	P1P2	CGN	CGN19719	Cucumis sativus var. sativus
CG5030	Lange Groene	Netherlands	P1P2	CGN	CGN19732	Cucumis sativus var. sativus
CG5031	Hok	Netherlands	P1P2	CGN	CGN20266	Cucumis sativus var. sativus
CG5032	Multo Improved	Netherlands	P1P2	CGN	CGN20824	Cucumis sativus var. sativus
CG5033	Eriko	Netherlands	P1P2	CGN	CGN20876	Cucumis sativus var. sativus
CG5034	Efram	Netherlands	P1P2	CGN	CGN20878	Cucumis sativus var. sativus
CG5035	Scherpe Kleine Groene	Netherlands	P1P2	CGN	CGN20921	Cucumis sativus var. sativus
CG5036	Broza H 581	Netherlands	P1P2	CGN	CGN21719	Cucumis sativus var. sativus
CG5037	Niagara	Netherlands	P1P2	NPGS	PI 406473	Cucumis sativus var. sativus
CG5038	Koravo	Netherlands	P1P2	NPGS	PI 422183	Cucumis sativus var. sativus
CG5039	Witlo	Netherlands	P1P2	NPGS	PI 422199	Cucumis sativus var. sativus
CG5040	Monastyrski Line 14	Poland	P1P2	CGN	CGN20514	Cucumis sativus var. sativus
CG5041	Soiul Cornichon	Romania	P1P2	CGN	CGN22247	Cucumis sativus var. sativus
CG5042	Bistritza	Romania	P1P2	CGN	CGN22949	Cucumis sativus var. sativus
CG5043	Shun Jian Huang Gua	Russian Federation	P1P2	IVF-CAAS	Ⅱ5A1239	Cucumis sativus var. sativus
CG5044	Рочнцлок	Russian Federation	P1P2	IVF-CAAS	Ⅱ5A1276	Cucumis sativus var. sativus
CG5045	Ларач	Russian Federation	P1P2	IVF-CAAS	Ⅱ5A1278	Cucumis sativus var. sativus
CG5046	Fu Duo Lie Yi(E 37)	Russian Federation	P1P2	IVF-CAAS	Ⅱ5A1352	Cucumis sativus var. sativus
CG5047	Аист	Russian Federation	P1P2	IVF-CAAS	Ⅱ5A1424	Cucumis sativus var. sativus
CG5048	Avangard 121	Russian Federation	P1P2	CGN	CGN19686	Cucumis sativus var. sativus
CG5049	Izobilnyi 131	Russian Federation	P1P2	CGN	CGN19729	Cucumis sativus var. sativus
CG5050	Polyarnyi 6	Russian Federation	P1P2	CGN	CGN20253	Cucumis sativus var. sativus
CG5051	Local 2824	Russian Federation	P1P2	CGN	CGN20924	Cucumis sativus var. sativus
CG5052	Posrednik 97-J	Russian Federation	P1P2	CGN	CGN23618	Cucumis sativus var. sativus
CG5053	Far Eastern	Russian Federation	P1P2	NPGS	Ames 25154	Cucumis sativus var. sativus
CG5054	44	Russian Federation	P1P2	NPGS	PI 466923	Cucumis sativus var. sativus
CG5055	Virovsky	Russian Federation, Lening	P1P2	NPGS	PI 263049	Cucumis sativus var. sativus
CG5056	Muromskii 36	Russian Federation, Moscow	P1P2	NPGS	PI 267087	Cucumis sativus var. sativus
CG5057	Avangard 121	Russian Federation, Primor	P1P2	NPGS	PI 306179	Cucumis sativus var. sativus
CG5058	Pi 257286	Spain, Murcia	P1P2	NPGS	PI 257286	Cucumis sativus var. sativus
CG5059	7589	Turkey, Kars	P1P2	NPGS	PI 174160	Cucumis sativus var. sativus
CG5060	Micstnyj	Former Soviet Union	P1P2	CGN	CGN19555	Cucumis sativus var. sativus
CG5061	Dalnevostochnyi 6	Former Soviet Union	P1P2	CGN	CGN19724	Cucumis sativus var. sativus
CG5062	Cgn19766	Former Soviet Union	P1P2	CGN	CGN19766	Cucumis sativus var. sativus
CG5063	Atlasnyi	Former Soviet Union	P1P2	CGN	CGN19837	Cucumis sativus var. sativus
CG5064	Odnostebelnyi Atlasnyi	Former Soviet Union	P1P2	CGN	CGN19838	Cucumis sativus var. sativus
CG5065	Dlinnoplodnyi 1294	Former Soviet Union	P1P2	CGN	CGN21301	Cucumis sativus var. sativus
CG5066	Langvruchtige	Former Soviet Union	P1P2	CGN	CGN21603	Cucumis sativus var. sativus
CG5067	Jet	Former Soviet Union	P1P2	CGN	CGN22249	Cucumis sativus var. sativus
CG5068	Perfection Ridge	United Kingdom	P1P2	CGN	CGN20849	Cucumis sativus var. sativus
CG5069	Sharpe's Epicurean	United Kingdom	P1P2	CGN	CGN20888	Cucumis sativus var. sativus
CG5070	Long Green	United Kingdom, London	P1P2	NPGS	PI 385968	Cucumis sativus var. sativus
CG5071	151G	NA	P1P2	IVF-CAAS	G12	Cucumis sativus var. sativus
CG5072	G195	NA	P1P2	IVF-CAAS	G195	Cucumis sativus var. sativus
CG5073	Konkurent 174	Former Soviet Union	P1P2	NPGS	Ames 19222	Cucumis sativus var. sativus
CG5074	Minerva Weibliche Linie	Hungary	P1P2	NPGS	PI 531314	Cucumis sativus var. sativus
CG5075	Numerus	Netherlands	P1P2	NPGS	PI 422186	Cucumis sativus var. sativus
CG5076	Неженскц	Russian Federation	P1P2	IVF-CAAS	Ⅱ5A1275	Cucumis sativus var. sativus
CG5077	ЖУРаРЪеник	Russian Federation	P1P2	IVF-CAAS	Ⅱ5A1381	Cucumis sativus var. sativus
CG5078	L 84 G100	Albania	P2	NPGS	Ames 22250	Cucumis sativus var. sativus
CG5079	Ziegler's Namenlose	Austria	P2	CGN	CGN21687	Cucumis sativus var. sativus
CG5080	Baarlose Nietplekkers	Belgium	P2	NPGS	PI271753	Cucumis sativus var. sativus
CG5081	Starozagorskie Langi	Bulgaria	P2	CGN	CGN19752	Cucumis sativus var. sativus
CG5082	89 E 510	Bulgaria	P2	CGN	CGN23432	Cucumis sativus var. sativus
CG5083	89 E 513	Bulgaria	P2	CGN	CGN23433	Cucumis sativus var. sativus
CG5084	Cus73/72	Croatia	P2	CGN	CGN22940	Cucumis sativus var. sativus
CG5085	Grivskij Rannij	Croatia	P2	CGN	CGN20246	Cucumis sativus var. sativus
CG5086	Beth Alpha	Cyprus	P2	CGN	CGN20908	Cucumis sativus var. sativus
CG5087	Fenix	Czech Republic	P2	NPGS	Ames 23007	Cucumis sativus var. sativus
CG5088	Palava	Czech Republic	P2	NPGS	Ames 23008	Cucumis sativus var. sativus
CG5089	ZE CMV	Czech Republic	P2	NPGS	Ames 23009	Cucumis sativus var. sativus
CG5090	Bilske Nakladacky	Czech Republic	P2	NPGS	PI 283899	Cucumis sativus var. sativus
CG5091	Melnicke Nakladacky	Czech Republic	P2	NPGS	PI 283900	Cucumis sativus var. sativus
CG5092	Mladoboleslavske Salatni	Czech Republic	P2	NPGS	PI 283901	Cucumis sativus var. sativus
CG5093	Delikates	Czech Republic	P2	NPGS	PI 422169	Cucumis sativus var. sativus
CG5094	Nejlepsi ze Vsech	Czech Republic	P2	NPGS	PI 422184	Cucumis sativus var. sativus
CG5095	Reforma	Czech Republic	P2	NPGS	PI 422192	Cucumis sativus var. sativus
CG5096	Unikat	Czech Republic	P2	NPGS	PI 422197	Cucumis sativus var. sativus
CG5097	Zidovicka Produkta	Czech Republic	P2	NPGS	PI 422200	Cucumis sativus var. sativus
CG5098	Bo Danoks	Czech Republic, Central	P2	NPGS	PI 422168	Cucumis sativus var. sativus
CG5099	Bilske Nakladacky	Czech Republic	P2	CGN	CGN19624	Cucumis sativus var. sativus
CG5100	Reforma	Czech Republic	P2	CGN	CGN20874	Cucumis sativus var. sativus
CG5101	Mladoboleslavska	Czechoslovakia	P2	CGN	CGN20839	Cucumis sativus var. sativus
CG5102	Landovskeho	Czechoslovakia	P2	CGN	CGN20842	Cucumis sativus var. sativus
CG5103	Typ Melnik	Czechoslovakia	P2	CGN	CGN21674	Cucumis sativus var. sativus
CG5104	Jedinecna	Czechoslovakia	P2	CGN	CGN22246	Cucumis sativus var. sativus
CG5105	Pickling F1 No. 40	Denmark	P2	NPGS	PI 342951	Cucumis sativus var. sativus
CG5106	Dansk Asie	Denmark	P2	CGN	CGN19584	Cucumis sativus var. sativus
CG5107	Ideal Daehnfeldt's Strain	Denmark	P2	CGN	CGN19585	Cucumis sativus var. sativus
CG5108	Langland's Kaempe	Denmark	P2	CGN	CGN19586	Cucumis sativus var. sativus
CG5109	Muromsk Drue	Denmark	P2	CGN	CGN19587	Cucumis sativus var. sativus
CG5110	Rhinsk Drue 39/59	Denmark	P2	CGN	CGN19588	Cucumis sativus var. sativus
CG5111	Topscore 62	Denmark	P2	CGN	CGN19589	Cucumis sativus var. sativus
CG5112	Vestervang Improved	Denmark	P2	CGN	CGN19590	Cucumis sativus var. sativus
CG5113	Cavallius Trauben Osena	Denmark	P2	CGN	CGN19591	Cucumis sativus var. sativus
CG5114	Superb Osena	Denmark	P2	CGN	CGN19596	Cucumis sativus var. sativus
CG5115	Sorgenfri Drue nr.365	Denmark	P2	CGN	CGN19645	Cucumis sativus var. sativus
CG5116	Sorgenfri Drue	Denmark	P2	CGN	CGN19646	Cucumis sativus var. sativus
CG5117	Langeland's Riesen Str.16	Denmark	P2	CGN	CGN19648	Cucumis sativus var. sativus
CG5118	Ashley	Denmark	P2	CGN	CGN19682	Cucumis sativus var. sativus
CG5119	Rensk Druv OE	Denmark	P2	CGN	CGN19720	Cucumis sativus var. sativus
CG5120	Spangsbjerg	Denmark	P2	CGN	CGN19772	Cucumis sativus var. sativus
CG5121	Drivgurka 21954	Denmark	P2	CGN	CGN20891	Cucumis sativus var. sativus
CG5122	Monopol	Denmark	P2	CGN	CGN20954	Cucumis sativus var. sativus
CG5123	Spotresisting O.E. Spezial	Denmark	P2	CGN	CGN21591	Cucumis sativus var. sativus
CG5124	Nordischer Prasident	Denmark	P2	CGN	CGN21600	Cucumis sativus var. sativus
CG5125	Butchers O.E.Spezial	Denmark	P2	CGN	CGN22931	Cucumis sativus var. sativus
CG5126	Spanberg Pickling	Denmark	P2	NPGS	PI 342950	Cucumis sativus var. sativus
CG5127	Rhinish Pickling 39/59H	Denmark	P2	NPGS	PI 354952	Cucumis sativus var. sativus
CG5128	Dolga crna	Former Serbia & Monteneg	P2	NPGS	PI 357830	Cucumis sativus var. sativus
CG5129	Crna dolga	Former Serbia & Monteneg	P2	NPGS	PI 357831	Cucumis sativus var. sativus
CG5130	Sitna	Former Serbia & Monteneg	P2	NPGS	PI 357842	Cucumis sativus var. sativus
CG5131	Crna	Former Serbia & Monteneg	P2	NPGS	PI 357844	Cucumis sativus var. sativus
CG5132	Vinicka	Former Serbia & Monteneg	P2	NPGS	PI 357845	Cucumis sativus var. sativus
CG5133	Kocanska	Former Serbia & Monteneg	P2	NPGS	PI 357846	Cucumis sativus var. sativus
CG5134	Kumanovska	Former Serbia & Monteneg	P2	NPGS	PI 357847	Cucumis sativus var. sativus
CG5135	Opliska	Former Serbia & Monteneg	P2	NPGS	PI 357849	Cucumis sativus var. sativus
CG5136	Ginovska	Former Serbia & Monteneg	P2	NPGS	PI 357850	Cucumis sativus var. sativus
CG5137	Prilepska	Former Serbia & Monteneg	P2	NPGS	PI 357851	Cucumis sativus var. sativus
CG5138	Dolga zelena	Former Serbia & Monteneg	P2	NPGS	PI 357853	Cucumis sativus var. sativus
CG5139	Vodjanska	Former Serbia & Monteneg	P2	NPGS	PI 357854	Cucumis sativus var. sativus
CG5140	Lokalna	Former Serbia & Monteneg	P2	NPGS	PI 379278	Cucumis sativus var. sativus
CG5141	Sredno-dolga	Former Serbia & Monteneg	P2	NPGS	PI 379279	Cucumis sativus var. sativus
CG5142	Krupna	Former Serbia & Monteneg	P2	NPGS	PI 379283	Cucumis sativus var. sativus
CG5143	Vinicka	Former Serbia & Monteneg	P2	NPGS	PI 379286	Cucumis sativus var. sativus
CG5144	Krupna	Former Serbia & Monteneg	P2	NPGS	PI 379287	Cucumis sativus var. sativus
CG5145	Hermaphrodite 61	Former Soviet Union	P2	NPGS	PI 351139	Cucumis sativus var. sativus
CG5146	Hermaphrodite 62	Former Soviet Union	P2	NPGS	PI 351140	Cucumis sativus var. sativus
CG5147	Germafrodit 61-2	Former Soviet Union	P2	NPGS	Ames 19220	Cucumis sativus var. sativus
CG5148	Determinantnaja 26-1/198	Former Soviet Union	P2	NPGS	Ames 19225	Cucumis sativus var. sativus
CG5149	Germafrodit 37259	Former Soviet Union	P2	NPGS	Ames 19229	Cucumis sativus var. sativus
CG5150	Altaj	Former Soviet Union	P2	NPGS	Ames 19230	Cucumis sativus var. sativus
CG5151	Germafrodit 39814	Former Soviet Union	P2	NPGS	Ames 19231	Cucumis sativus var. sativus
CG5152	Bershzovskii (Bersenevsk	Former Soviet Union	P2	NPGS	PI 267086	Cucumis sativus var. sativus
CG5153	Nezheeskii 12 (Elita)(N	Former Soviet Union	P2	NPGS	PI 267088	Cucumis sativus var. sativus
CG5154	Rzhavskii	Former Soviet Union	P2	NPGS	PI 343451	Cucumis sativus var. sativus
CG5155	Vyaznikovskii 37	Former Soviet Union	P2	NPGS	PI 343452	Cucumis sativus var. sativus
CG5156	Polyarnye 571	Former Soviet Union	P2	NPGS	PI 504559	Cucumis sativus var. sativus
CG5157	Vyzanikovski	Former Soviet Union	P2	NPGS	PI 504561	Cucumis sativus var. sativus
CG5158	VIR 714	Former Soviet Union	P2	NPGS	PI 504562	Cucumis sativus var. sativus
CG5159	Galahovskie	Former Soviet Union	P2	NPGS	PI 504566	Cucumis sativus var. sativus
CG5160	Nerosimye	Former Soviet Union	P2	NPGS	PI 504567	Cucumis sativus var. sativus
CG5161	Malahit	Former Soviet Union	P2	NPGS	PI 532519	Cucumis sativus var. sativus
CG5162	Moskovskij	Former Soviet Union	P2	NPGS	PI 532520	Cucumis sativus var. sativus
CG5163	Fin de Meaux	France	P2	CGN	CGN19623	Cucumis sativus var. sativus
CG5164	Vert Petit de Paris	France	P2	CGN	CGN19801	Cucumis sativus var. sativus
CG5165	Vert de Massy	France	P2	CGN	CGN19802	Cucumis sativus var. sativus
CG5166	Parijse Korte Groene	France	P2	CGN	CGN20920	Cucumis sativus var. sativus
CG5167	Vert Long de Chine	France	P2	CGN	CGN20935	Cucumis sativus var. sativus
CG5168	Vert Long Allemand	France	P2	CGN	CGN20936	Cucumis sativus var. sativus
CG5169	Verbesserte aus Bourbonne	France	P2	CGN	CGN20958	Cucumis sativus var. sativus
CG5170	Vorgebirg	France	P2	NPGS	PI 264226	Cucumis sativus var. sativus
CG5171	Delicatess	France	P2	NPGS	PI 264227	Cucumis sativus var. sativus
CG5172	Gloire de Paris	France	P2	NPGS	PI 264229	Cucumis sativus var. sativus
CG5173	Vert Long Allemand	France	P2	NPGS	PI 264230	Cucumis sativus var. sativus
CG5174	Spiers	France	P2	NPGS	PI 264231	Cucumis sativus var. sativus
CG5175	Mestnyi (Ryabchik)	Georgia	P2	CGN	CGN20925	Cucumis sativus var. sativus
CG5176	Nejinske	Georgia	P2	NPGS	PI 314425	Cucumis sativus var. sativus
CG5177	Mukranke	Georgia	P2	NPGS	PI 314426	Cucumis sativus var. sativus
CG5178	Caisci	Georgia	P2	NPGS	PI 390951	Cucumis sativus var. sativus
CG5179	Landgurken Delikaress	Germany	P2	NPGS	PI 264666	Cucumis sativus var. sativus
CG5180	Landgurken Vorgegirgstra	Germany	P2	NPGS	PI 264667	Cucumis sativus var. sativus
CG5181	Riesen Schael	Germany	P2	CGN	CGN19594	Cucumis sativus var. sativus
CG5182	Reform	Germany	P2	CGN	CGN19638	Cucumis sativus var. sativus
CG5183	Hoffmann's Giganta	Germany	P2	CGN	CGN19640	Cucumis sativus var. sativus
CG5184	Hoffmann's Producta	Germany	P2	CGN	CGN19681	Cucumis sativus var. sativus
CG5185	Moneta	Germany	P2	CGN	CGN19690	Cucumis sativus var. sativus
CG5186	Bismark	Germany	P2	CGN	CGN19773	Cucumis sativus var. sativus
CG5187	Delicatess	Germany	P2	CGN	CGN19793	Cucumis sativus var. sativus
CG5188	Grochlitzer	Germany	P2	CGN	CGN20239	Cucumis sativus var. sativus
CG5189	Dickfleischige Gelbe (Nr 555)	Germany	P2	CGN	CGN20901	Cucumis sativus var. sativus
CG5190	Kardia	Germany	P2	CGN	CGN20945	Cucumis sativus var. sativus
CG5191	Rheinische Vorgebirgstrauben	Germany	P2	CGN	CGN20951	Cucumis sativus var. sativus
CG5192	Halslose Spotresisting	Germany	P2	CGN	CGN21598	Cucumis sativus var. sativus
CG5193	Beste von Allen	Germany	P2	CGN	CGN21604	Cucumis sativus var. sativus
CG5194	Vivat	Germany	P2	CGN	CGN21641	Cucumis sativus var. sativus
CG5195	Hilds Glattschalige Traube	Germany	P2	CGN	CGN21658	Cucumis sativus var. sativus
CG5196	Eva	Germany	P2	CGN	CGN21676	Cucumis sativus var. sativus
CG5197	Landgurken Vorgebirgstrauben	Germany	P2	CGN	CGN21709	Cucumis sativus var. sativus
CG5198	Hoffmann's Dominia	Germany	P2	CGN	CGN22239	Cucumis sativus var. sativus
CG5199	Cornichon Mouthery	Germany	P2	CGN	CGN22248	Cucumis sativus var. sativus
CG5200	Koningsdorffers Unermudliche	Germany	P2	CGN	CGN22258	Cucumis sativus var. sativus
CG5201	Noas Treib	Germany	P2	CGN	CGN22259	Cucumis sativus var. sativus
CG5202	Venloer Trauben	Germany	P2	CGN	CGN22944	Cucumis sativus var. sativus
CG5203	Berliner Aal	Germany	P2	CGN	CGN22953	Cucumis sativus var. sativus
CG5204	Hampels Verbesserte	Germany	P2	CGN	CGN22954	Cucumis sativus var. sativus
CG5205	Bautzener Kastengurke	Germany	P2	CGN	CGN22956	Cucumis sativus var. sativus
CG5206	Delicatess	Germany	P2	CGN	CGN22965	Cucumis sativus var. sativus
CG5207	Delicatess	Germany	P2	CGN	CGN22968	Cucumis sativus var. sativus
CG5208	Delicatess	Germany	P2	CGN	CGN22973	Cucumis sativus var. sativus
CG5209	Delicatess	Germany	P2	CGN	CGN22977	Cucumis sativus var. sativus
CG5210	Delicatess	Germany	P2	CGN	CGN22979	Cucumis sativus var. sativus
CG5211	Landgurken Delikaress	Germany	P2	NPGS	PI 264664	Cucumis sativus var. sativus
CG5212	Landgurken Delikaress	Germany	P2	NPGS	PI 264665	Cucumis sativus var. sativus
CG5213	Cus16/72	Greece	P2	CGN	CGN22244	Cucumis sativus var. sativus
CG5214	Kalivia	Greece	P2	NPGS	PI 212059	Cucumis sativus var. sativus
CG5215	Francia Furtos	Hungary	P2	CGN	CGN19625	Cucumis sativus var. sativus
CG5216	Kecskemeti	Hungary	P2	CGN	CGN19626	Cucumis sativus var. sativus
CG5217	Muromi Furtos	Hungary	P2	CGN	CGN19659	Cucumis sativus var. sativus
CG5218	Nemet Kigyo	Hungary	P2	CGN	CGN19660	Cucumis sativus var. sativus
CG5219	Kecskemeti keseredes-mentes konserv	Hungary	P2	CGN	CGN19823	Cucumis sativus var. sativus
CG5220	Kecskemeti Botermo	Hungary	P2	CGN	CGN19824	Cucumis sativus var. sativus
CG5221	Kecskemeti Livme	Hungary	P2	CGN	CGN19831	Cucumis sativus var. sativus
CG5222	Monsun Furtos	Hungary	P2	CGN	CGN20241	Cucumis sativus var. sativus
CG5223	Kecskemeti Csemege	Hungary	P2	CGN	CGN20271	Cucumis sativus var. sativus
CG5224	Kinai Kigyo VII-4-8	Hungary	P2	CGN	CGN21624	Cucumis sativus var. sativus
CG5225	Osemege Furtos	Hungary	P2	CGN	CGN22273	Cucumis sativus var. sativus
CG5226	Rajnai Furtos	Hungary	P2	CGN	CGN22951	Cucumis sativus var. sativus
CG5227	Kecskemeti Hamvas	Hungary	P2	NPGS	PI 288990	Cucumis sativus var. sativus
CG5228	Parizsi Furtos	Hungary	P2	NPGS	PI 288991	Cucumis sativus var. sativus
CG5229	Muromi Furtos	Hungary	P2	NPGS	PI 288992	Cucumis sativus var. sativus
CG5230	Nemet Furtos	Hungary	P2	NPGS	PI 288993	Cucumis sativus var. sativus
CG5231	Francia Furtos	Hungary	P2	NPGS	PI 288994	Cucumis sativus var. sativus
CG5232	Nemet Kigyo	Hungary	P2	NPGS	PI 288995	Cucumis sativus var. sativus
CG5233	Kinai Kigyo	Hungary	P2	NPGS	PI 288996	Cucumis sativus var. sativus
CG5234	Kecskemeti Hamvas	Hungary	P2	NPGS	PI 326594	Cucumis sativus var. sativus
CG5235	Kecskemeti 3 (F1)	Hungary	P2	NPGS	PI 326595	Cucumis sativus var. sativus
CG5236	Kecskemeti 31 (F1)	Hungary	P2	NPGS	PI 326596	Cucumis sativus var. sativus
CG5237	Kecskemeti 32 (F1)	Hungary	P2	NPGS	PI 326597	Cucumis sativus var. sativus
CG5238	2700999	Hungary	P2	NPGS	PI 507875	Cucumis sativus var. sativus
CG5239	Budai Csemege	Hungary	P2	NPGS	PI 531308	Cucumis sativus var. sativus
CG5240	Kecskemeti Botermo	Hungary	P2	NPGS	PI 531309	Cucumis sativus var. sativus
CG5241	Kecskemeti Csemege	Hungary	P2	NPGS	PI 531310	Cucumis sativus var. sativus
CG5242	Kecskemeti Keseredesment	Hungary	P2	NPGS	PI 531312	Cucumis sativus var. sativus
CG5243	Kecskemeti Livme	Hungary	P2	NPGS	PI 531313	Cucumis sativus var. sativus
CG5244	2701000	Hungary, Nograd	P2	NPGS	PI 507876	Cucumis sativus var. sativus
CG5245	2700817	Hungary, Szabolcs-Szatmar	P2	NPGS	PI 507874	Cucumis sativus var. sativus
CG5246	Cubit Mezzo Lungo	Italy	P2	CGN	CGN19665	Cucumis sativus var. sativus
CG5247	Ikar F1	Moldova	P2	NPGS	Ames 19228	Cucumis sativus var. sativus
CG5248	Odnosterbelnyi 33	Moldova	P2	CGN	CGN20257	Cucumis sativus var. sativus
CG5249	T2	Netherlands	P2	NPGS	PI 255933	Cucumis sativus var. sativus
CG5250	Eminent	Netherlands	P2	CGN	CGN19532	Cucumis sativus var. sativus
CG5251	Manloos M 66-19	Netherlands	P2	CGN	CGN19533	Cucumis sativus var. sativus
CG5252	Manloos M 66-19822	Netherlands	P2	CGN	CGN19534	Cucumis sativus var. sativus
CG5253	Albaster	Netherlands	P2	CGN	CGN19537	Cucumis sativus var. sativus
CG5254	Amato	Netherlands	P2	CGN	CGN19538	Cucumis sativus var. sativus
CG5255	Groene Broeikomkommer	Netherlands	P2	CGN	CGN19542	Cucumis sativus var. sativus
CG5256	Groene Standaard	Netherlands	P2	CGN	CGN19543	Cucumis sativus var. sativus
CG5257	Halflange Rijkdragende Delftse	Netherlands	P2	CGN	CGN19544	Cucumis sativus var. sativus
CG5258	Extra Lange Donkergroene	Netherlands	P2	CGN	CGN19545	Cucumis sativus var. sativus
CG5259	E-2	Netherlands	P2	CGN	CGN19547	Cucumis sativus var. sativus
CG5260	BA 225	Netherlands	P2	CGN	CGN19548	Cucumis sativus var. sativus
CG5261	DSG no.73	Netherlands	P2	CGN	CGN19556	Cucumis sativus var. sativus
CG5262	Bivur	Netherlands	P2	CGN	CGN19558	Cucumis sativus var. sativus
CG5263	Gravita	Netherlands	P2	CGN	CGN19559	Cucumis sativus var. sativus
CG5264	Groene nr.21119	Netherlands	P2	CGN	CGN19560	Cucumis sativus var. sativus
CG5265	M 100	Netherlands	P2	CGN	CGN19561	Cucumis sativus var. sativus
CG5266	Concorde	Netherlands	P2	CGN	CGN19562	Cucumis sativus var. sativus
CG5267	Addis	Netherlands	P2	CGN	CGN19577	Cucumis sativus var. sativus
CG5268	Oudendam A	Netherlands	P2	CGN	CGN19581	Cucumis sativus var. sativus
CG5269	Venus	Netherlands	P2	CGN	CGN19620	Cucumis sativus var. sativus
CG5270	Witte Westlandse	Netherlands	P2	CGN	CGN19633	Cucumis sativus var. sativus
CG5271	Ideaal	Netherlands	P2	CGN	CGN19634	Cucumis sativus var. sativus
CG5272	Habro	Netherlands	P2	CGN	CGN19649	Cucumis sativus var. sativus
CG5273	Esvier	Netherlands	P2	CGN	CGN19653	Cucumis sativus var. sativus
CG5274	Venus	Netherlands	P2	CGN	CGN19654	Cucumis sativus var. sativus
CG5275	Bonnie Lang	Netherlands	P2	CGN	CGN19674	Cucumis sativus var. sativus
CG5276	Betuwse Witte	Netherlands	P2	CGN	CGN19675	Cucumis sativus var. sativus
CG5277	Amsterdamse Lange Gele	Netherlands	P2	CGN	CGN19676	Cucumis sativus var. sativus
CG5278	M 5	Netherlands	P2	CGN	CGN19677	Cucumis sativus var. sativus
CG5279	M 1	Netherlands	P2	CGN	CGN19678	Cucumis sativus var. sativus
CG5280	Bonnie Kort	Netherlands	P2	CGN	CGN19679	Cucumis sativus var. sativus
CG5281	Truda	Netherlands	P2	CGN	CGN19714	Cucumis sativus var. sativus
CG5282	Gele Tros	Netherlands	P2	CGN	CGN19716	Cucumis sativus var. sativus
CG5283	Lange Groene	Netherlands	P2	CGN	CGN19717	Cucumis sativus var. sativus
CG5284	Gele Tros	Netherlands	P2	CGN	CGN19718	Cucumis sativus var. sativus
CG5285	Lange Gele Tros	Netherlands	P2	CGN	CGN19722	Cucumis sativus var. sativus
CG5286	Gele Tros	Netherlands	P2	CGN	CGN19730	Cucumis sativus var. sativus
CG5287	Gele Tros	Netherlands	P2	CGN	CGN19731	Cucumis sativus var. sativus
CG5288	Lange Gele Tros	Netherlands	P2	CGN	CGN19733	Cucumis sativus var. sativus
CG5289	Hollandse Lange Groene	Netherlands	P2	CGN	CGN19734	Cucumis sativus var. sativus
CG5290	Spiers	Netherlands	P2	CGN	CGN19779	Cucumis sativus var. sativus
CG5291	Hokus	Netherlands	P2	CGN	CGN19786	Cucumis sativus var. sativus
CG5292	Gebeha A 30	Netherlands	P2	CGN	CGN19787	Cucumis sativus var. sativus
CG5293	Femina	Netherlands	P2	CGN	CGN19788	Cucumis sativus var. sativus
CG5294	Gunter	Netherlands	P2	CGN	CGN19789	Cucumis sativus var. sativus
CG5295	Guntruud	Netherlands	P2	CGN	CGN19790	Cucumis sativus var. sativus
CG5296	Ventruud	Netherlands	P2	CGN	CGN19791	Cucumis sativus var. sativus
CG5297	Femina	Netherlands	P2	CGN	CGN19792	Cucumis sativus var. sativus
CG5298	Guntruud 12	Netherlands	P2	CGN	CGN19795	Cucumis sativus var. sativus
CG5299	Epram I	Netherlands	P2	CGN	CGN19796	Cucumis sativus var. sativus
CG5300	Epram II	Netherlands	P2	CGN	CGN19797	Cucumis sativus var. sativus
CG5301	Robusta origineel	Netherlands	P2	CGN	CGN19800	Cucumis sativus var. sativus
CG5302	Venlose Export	Netherlands	P2	CGN	CGN19805	Cucumis sativus var. sativus
CG5303	Bivuwit	Netherlands	P2	CGN	CGN19810	Cucumis sativus var. sativus
CG5304	Bivugeel	Netherlands	P2	CGN	CGN19811	Cucumis sativus var. sativus
CG5305	RS 88	Netherlands	P2	CGN	CGN19833	Cucumis sativus var. sativus
CG5306	Kumixa D	Netherlands	P2	CGN	CGN20199	Cucumis sativus var. sativus
CG5307	Witte Bruid	Netherlands	P2	CGN	CGN20200	Cucumis sativus var. sativus
CG5308	Vios	Netherlands	P2	CGN	CGN20201	Cucumis sativus var. sativus
CG5309	Clarex	Netherlands	P2	CGN	CGN20202	Cucumis sativus var. sativus
CG5310	Groene Broeikomkommer	Netherlands	P2	CGN	CGN20207	Cucumis sativus var. sativus
CG5311	Westlandse Halflange Witte	Netherlands	P2	CGN	CGN20208	Cucumis sativus var. sativus
CG5312	Halflange Groene	Netherlands	P2	CGN	CGN20209	Cucumis sativus var. sativus
CG5313	Lentse Gele	Netherlands	P2	CGN	CGN20210	Cucumis sativus var. sativus
CG5314	Amsterdamse Lange Gele	Netherlands	P2	CGN	CGN20216	Cucumis sativus var. sativus
CG5315	Lentse Vroege Lange Gele	Netherlands	P2	CGN	CGN20217	Cucumis sativus var. sativus
CG5316	Excelsior	Netherlands	P2	CGN	CGN20233	Cucumis sativus var. sativus
CG5317	Sporu Zaadvast	Netherlands	P2	CGN	CGN20252	Cucumis sativus var. sativus
CG5318	Guntruud	Netherlands	P2	CGN	CGN20255	Cucumis sativus var. sativus
CG5319	Femina	Netherlands	P2	CGN	CGN20256	Cucumis sativus var. sativus
CG5320	Baarlose Nietplekkers, Ras VI	Netherlands	P2	CGN	CGN20258	Cucumis sativus var. sativus
CG5321	Baarlose Nietplekkers, Ras VII	Netherlands	P2	CGN	CGN20259	Cucumis sativus var. sativus
CG5322	Nimbus	Netherlands	P2	CGN	CGN20262	Cucumis sativus var. sativus
CG5323	Grafina	Netherlands	P2	CGN	CGN20263	Cucumis sativus var. sativus
CG5324	Unicrop	Netherlands	P2	CGN	CGN20267	Cucumis sativus var. sativus
CG5325	Bittervrij	Netherlands	P2	CGN	CGN20268	Cucumis sativus var. sativus
CG5326	752	Netherlands	P2	CGN	CGN20512	Cucumis sativus var. sativus
CG5327	Femkor	Netherlands	P2	CGN	CGN20825	Cucumis sativus var. sativus
CG5328	Stam A	Netherlands	P2	CGN	CGN20827	Cucumis sativus var. sativus
CG5329	Hokus	Netherlands	P2	CGN	CGN20831	Cucumis sativus var. sativus
CG5330	Dew	Netherlands	P2	CGN	CGN20832	Cucumis sativus var. sativus
CG5331	Mirella	Netherlands	P2	CGN	CGN20838	Cucumis sativus var. sativus
CG5332	Lijn E	Netherlands	P2	CGN	CGN20858	Cucumis sativus var. sativus
CG5333	Salvo	Netherlands	P2	CGN	CGN20877	Cucumis sativus var. sativus
CG5334	Edelweisz	Netherlands	P2	CGN	CGN20879	Cucumis sativus var. sativus
CG5335	Evergreen	Netherlands	P2	CGN	CGN20907	Cucumis sativus var. sativus
CG5336	Vreko	Netherlands	P2	CGN	CGN20918	Cucumis sativus var. sativus
[truncated: 1,343 more rows]
